# Supplementary material
Source: publisher site journal article supplement (https://www.dovepress.com/get_supplementary_file.php?f=342368.xlsx)
Supplement: Supplementary file 1 [file get_supplementary_file.php]

## Sheet: A1A2
Protein	Protein.name	log2(A1/A2)		Protein	Protein.name	log2(A1/A2)		Protein	Protein.name	log2(A1/A2)		Protein	Protein.name
W1DEU9	siderophore transport，Iron(III) dicitrate transport protein FecA，iron ion binding，signaling receptor activity	7.79782		W1DCE9	Putative exported protein	2.12609		W1DGC1	Lysine decarboxylase, inducible	-11.6128		W1DCK7	Anaerobic dimethyl sulfoxide reductase chain A
W1DG48	1-phosphofructokinase	6.11959		W1DCH6	Isocitrate lyase	1.2898		W1DGJ4	Succinate dehydrogenase iron-sulfur subunit	-7.33849		W1DCM4	Putative cold-shock protein
W1DGB7	Catecholate siderophore receptor CirA，Colicin I receptor，TonB-dependent receptor	5.81643		W1DCL9	Phosphoserine aminotransferase	3.50143		W1DGK3	Aconitate hydratase	-6.54547		W1DCS9	Putative acetyltransferase
W1DGL4	Fe(2+) transporter FeoB ，Ferrous iron transport protein B	5.72733		W1DCN3	NADH dehydrogenase	2.19048		W1DI50	NADP-dependent malic enzyme	-8.29799		W1DCW5	Serine--tRNA ligase
W1DGS7	Outer Membrane Siderophore Receptor IroN，TonB-dependent siderophore receptor	7.10014		W1DCX9	Uncharacterized protein ImpB	4.35292		W1DIM9	Autoinducer 2 (AI-2) aldolase LsrF	-7.61254		W1DD42	Galactose/methyl galactoside ABC transport system, D-galactose-binding periplasmic protein MglB (TC 3.A.1.2.3)
W1DHM0	SSU ribosomal protein S20p，30S ribosomal protein S20	7.14418		W1DD01	Lactoylglutathione lyase	2.40813		W1DIR9	Cytochrome d ubiquinol oxidase subunit II	-7.283		W1DDC0	Osmotically inducible protein OsmY
W1DJ96	Enolase-phosphatase E1	9.93283		W1DD55	Uncharacterized protein	2.16333		W1DJ17	Fumarate hydratase class I	-6.41489		W1DDF7	Glutathionylspermidine synthase / Glutathionylspermidine amidohydrolase
W1DJI6	Glutamate synthase [NADPH] small chain	5.60649		W1DD89	Phosphoribosylamine--glycine ligase	4.83748		W1DJQ8	Bacterioferritin	-7.86671		W1DDG8	Inositol-1-monophosphatase
W1DJK3	Iron uptake system component ，Ferrous iron transport periplasmic protein EfeO,contains peptidase-M75 domain and (Frequently) cupredoxin-like domain	6.4235		W1DDB1	Glutaredoxin	1.73416		W1DJV9	Universal stress protein F	-7.35824		W1DDH2	Free methionine-(R)-sulfoxide reductase, contains GAF domain
W1DJM0	Outer membrane chaperone Skp (OmpH)，COG2825: Outer membrane protein	5.86556		W1DDF2	GTPase HflX	1.11866		W1DKA1	Aspartate ammonia-lyase	-6.35644		W1DDU4	Phosphate starvation-inducible ATPase PhoH with RNA binding motif
W1DJS3	YncE，Uncharacterized protein	5.63286		W1DDH7	Acetolactate synthase small subunit	2.62636		W1DL89	Xaa-Pro dipeptidase	-8.0238		W1DDU8	Lysine-specific permease
W1DJT2	metal ion binding，Carbamoyl-phosphate synthase large chain	7.52819		W1DDM1	D-alanine--D-alanine ligase	2.56263		W1DLA5	Dihydrolipoamide succinyltransferase component (E2) of 2-oxoglutarate dehydrogenase complex	-7.41216		W1DE29	DNA topoisomerase I
W1DK89	Argininosuccinate lyase	6.10441		W1DDU5	MotA/TolQ/ExbB proton channel family protein	4.42026		W1DLX7	Alcohol dehydrogenase	-6.86047		W1DE38	GTP cyclohydrolase II
W1DKB3	Dihydroxy-acid dehydratase	5.78662		W1DDV3	1-phosphofructokinase	2.88642		W1DM70	50S ribosomal protein L16	-7.57066		W1DE99	Succinate dehydrogenase flavoprotein subunit
W1DL93	Candidate zinc-binding lipoprotein ZinT	7.92577		W1DDW4	Glutaredoxin	3.38823		W1DP34	Transcription termination/antitermination protein NusA	-8.08234		W1DEA5	NAD-dependent malic enzyme
W1DLP5	50S ribosomal protein L7/L12	6.19512		W1DE97	Fructose-specific phosphocarrier protein HPr / PTS system, fructose-specific IIA component	3.8263		W1DQX2	Uridine phosphorylase	-7.68933		W1DEA9	2,3-bisphosphoglycerate-independent phosphoglycerate mutase
W1DLQ6	Inosine-5-monophosphate dehydrogenase	5.7436		W1DEE8	DNA topoisomerase 4 subunit A	1.40861		W1DR88	Quinone-dependent D-lactate dehydrogenase	-6.91754		W1DEH0	UPF0227 protein
W1DM60	50S ribosomal protein L30，structural constituent of ribosome	5.70675		W1DEJ4	Ribosome-binding ATPase YchF	2.85923		W1DR89	Phosphoenolpyruvate carboxykinase [ATP]	-6.8984		W1DEH2	Aconitate hydratase
W1DME6	Acetolactate synthase, catabolic	6.77733		W1DEK0	Pseudouridine synthase	2.65547		W1DRI9	Glucosamine--fructose-6-phosphate aminotransferase [isomerizing]	-7.44039		W1DEN3	2-oxoglutarate dehydrogenase E1 component
W1DML5	Uncharacterized protein	7.24145		W1DEL8	Peptidase T	1.35928		W1DRX3	Glucose-1-phosphatase	-6.39152		W1DEU4	Inosine-5-monophosphate dehydrogenase
W1DN80	BudC protein，2,3-butanediol dehydrogenase, S-alcohol forming,(R)-acetoin-specific / Acetoin (Diacetyl) reductase	8.66734		W1DEQ9	Formate efflux transporter (TC 2.A.44 family)	1.04761		W1DS27	Uncharacterized protein	-10.4752		W1DF25	Anaerobic dimethyl sulfoxide reductase chain A
W1DN90	ZnuA，Zinc ABC transporter, periplasmic-binding protein	9.36426		W1DEX1	Ribose ABC transport system, periplasmic ribose-binding protein RbsB (TC 3.A.1.2.1)	2.95379		W1DT82	Phosphoenolpyruvate carboxykinase (ATP)	-9.12385		W1DF36	ATP synthase subunit c
W1DNP4	DNA-binding protein HU-alpha	7.6934		W1DEZ4	50S ribosomal protein L31 type B	5.37894		W1DV39	Uronate isomerase	-6.55225		W1DF40	Ribonuclease T
W1DNP7	YjiM protein，Uncharacterized protein	8.96901		W1DF32	Pyruvate formate-lyase	2.387		W1DVN0	Uncharacterized protein	-6.34642		W1DF42	tRNA uridine 5-carboxymethylaminomethyl modification enzyme MnmG
W1DP04	Argininosuccinate synthase	5.76733		W1DF57	Putrescine ABC transporter putrescine-binding protein PotF (TC 3.A.1.11.2)	4.77286		W1DVV0	Acid phosphatase	-7.68631		W1DF59	Endoribonuclease L-PSP
W1DP28	Putative sugar ABC transporter	6.1859		W1DF62	FIG004016: Uncharacterized protein YggN	4.5764		W1DWH1	Maltoporin (Maltose/maltodextrin high-affinity receptor, phage lambda receptor protein)	-7.12655		W1DF91	Tyrosyl-tRNA synthetase
W1DPF9	Uncharacterized protein	5.90098		W1DF86	Phosphomethylpyrimidine synthase	2.59514		W1DWJ1	Outer membrane protein W	-8.84052		W1DF98	Topoisomerase IV subunit B
W1DR30	Alpha-acetolactate decarboxylase	7.31877		W1DFC2	Acetolactate synthase	5.19802						W1DFB0	Manganese superoxide dismutase
W1DSN5	zinc ion binding，Methionine synthase	6.78129		W1DFJ8	Pyridoxine/pyridoxamine 5-phosphate oxidase	3.28879						W1DFB5	tRNA modification GTPase MnmE
W1DST8	Outer membrane protein F	6.03132		W1DFR5	Glutamine ABC transporter, periplasmic glutamine-binding protein (TC 3.A.1.3.2)	4.10872						W1DFB6	RNA chaperone ProQ
W1DSU1	zinc ion binding，5-methyltetrahydropteroyltriglutamate--homocysteine methyltransferase	6.40859		W1DFV9	ATP-dependent Clp protease proteolytic subunit	1.10189						W1DFD6	Phosphate ABC transporter, periplasmic phosphate-binding protein PstS (TC 3.A.1.7.1)
W1DTR6	Riboflavin synthase eubacterial/eukaryotic	6.10341		W1DFW8	Exoribonuclease 2	2.42311						W1DFJ2	Ubiquinol oxidase subunit 2
W1DU44	ABC-type amino acid transport/signal transduction systems, periplasmic component/domain	8.64614		W1DG08	Outer membrane vitamin B12 receptor BtuB	4.47444						W1DFK8	Inorganic pyrophosphatase
W1DVN9	ATP-binding cassette (ABC) transporter complex，Dipeptide-binding ABC transporter, periplasmic substrate-binding component (TC 3.A.1.5.2)	6.77738		W1DG25	L-threonine dehydratase	4.13512						W1DFN3	Tail-specific protease
				W1DG42	Thioredoxin	4.34517						W1DFN9	2-isopropylmalate synthase
				W1DG79	Manganese ABC transporter, ATP-binding protein SitB	4.16421						W1DFP3	Transcriptional regulator MraZ
				W1DG91	Oligopeptidase A	2.69543						W1DFR6	Acyl carrier protein
				W1DG97	Outer membrane protein Imp, required for envelope biogenesis / Organic solvent tolerance protein	3.93167						W1DFS7	Pyruvate oxidase [ubiquinone, cytochrome]
				W1DGB5	Branched-chain-amino-acid aminotransferase	1.66009						W1DFV4	Hypothetical lipoprotein YajG
				W1DGB9	DNA topoisomerase I	1.24628						W1DFW9	RNA polymerase-associated protein RapA
				W1DGC0	PTS system, fructose-specific IIB component / PTS system, fructose-specific IIC component	5.09064						W1DG04	Soluble pyridine nucleotide transhydrogenase
				W1DGC2	Ketol-acid reductoisomerase	3.38418						W1DG35	Glutamate Aspartate periplasmic binding protein GltI (TC 3.A.1.3.4)
				W1DGD3	Protein-export protein SecB	1.8516						W1DG40	tRNA-2-methylthio-N(6)-dimethylallyladenosine synthase
				W1DGF4	VgrG protein	1.14941						W1DG49	Ethanolamine utilization protein EutQ
				W1DGP1	Homoserine O-succinyltransferase	1.41002						W1DG54	Transaldolase
				W1DGP4	High-affinity leucine-specific transport system,periplasmic binding protein LivK (TC 3.A.1.4.1)	1.55943						W1DG75	Homoserine kinase
				W1DGR1	Paraquat-inducible protein B	2.58145						W1DG85	Polymyxin resistance protein ArnA_DH,UDP-glucuronic acid decarboxylase / Polymyxin resistance protein ArnA_FT, UDP-4-amino-4-deoxy-L-arabinose formylase
				W1DGS0	Sulfate adenylyltransferase	3.95686						W1DGC3	Aconitate hydratase
				W1DGT2	Ribose ABC transport system, periplasmic ribose-binding protein RbsB (TC 3.A.1.2.1)	3.49154						W1DGD0	50S ribosomal protein L3 glutamine methyltransferase
				W1DGT4	Pyruvate formate-lyase	1.32535						W1DGE1	Phosphoenolpyruvate carboxykinase (ATP)
				W1DGU6	1,2-dihydroxy-3-keto-5-methylthiopentene dioxygenase	3.26932						W1DGF2	Glucose-6-phosphate 1-dehydrogenase
				W1DH29	Biotin carboxylase	1.1743						W1DGG5	6-phosphogluconolactonase
				W1DH45	ABC transporter, periplasmic spermidine putrescine-binding protein PotD (TC 3.A.1.11.1)	3.03326						W1DGH4	Glutaminyl-tRNA synthetase
				W1DH46	Ornithine carbamoyltransferase	5.3021						W1DGJ6	DNA topoisomerase I
				W1DH48	Probable tonB-dependent receptor yncD	3.01169						W1DGL0	Phosphohistidine phosphatase SixA
				W1DHB2	Phosphate ABC transporter, periplasmic phosphate-binding protein PstS (TC 3.A.1.7.1)	3.38498						W1DGL2	Pseudouridine synthase
				W1DHC3	ATP synthase gamma chain	1.68661						W1DGN8	3-to-5 exoribonuclease RNase R
				W1DHF2	Glycerol dehydrogenase	1.45302						W1DGP3	Rod shape-determining protein MreB
				W1DHF3	Type I secretion outer membrane protein, TolC	1.61632						W1DGS4	Glutamine--tRNA ligase
				W1DHG2	Dipeptide-binding ABC transporter, periplasmic substrate-binding component (TC 3.A.1.5.2) Putative hemin-binding lipoprotein	2.40404						W1DGT1	Ferric uptake regulation protein
				W1DHG9	Tyrosine--tRNA ligase	1.43158						W1DGV9	Transcriptional repressor of the lac operon
				W1DHH1	3-polyprenyl-4-hydroxybenzoate carboxy-lyase	4.67436						W1DGW6	tRNA sulfurtransferase
				W1DHI3	Dihydrodipicolinate synthase	2.51932						W1DGW9	Periplasmic Murein Peptide-Binding Protein MppA
				W1DHK7	50S ribosomal protein L31	4.16214						W1DGY8	Cob(I)alamin adenosyltransferase
				W1DHM5	NAD-dependent glyceraldehyde-3-phosphate dehydrogenase	1.04755						W1DGY9	RNA polymerase sigma factor RpoD
				W1DHM8	3-isopropylmalate dehydrogenase	4.22819						W1DGZ2	Cyclic di-GMP-binding protein
				W1DHM9	ATP synthase subunit b	1.2306						W1DH01	GTP cyclohydrolase 1
				W1DHP2	Dipeptide-binding ABC transporter, periplasmic substrate-binding component (TC 3.A.1.5.2) Putative hemin-binding lipoprotein	2.89497						W1DH07	Universal stress protein
				W1DHQ6	Maltoporin (Maltose/maltodextrin high-affinity receptor, phage lambda receptor protein)	3.52237						W1DH13	Mannose-1-phosphate guanylyltransferase (GDP)
				W1DHT2	Phospho-2-dehydro-3-deoxyheptonate aldolase	4.95996						W1DHA1	Glutamate dehydrogenase
				W1DHU5	Thiol peroxidase, Bcp-type	1.92417						W1DHA6	Fructose-1,6-bisphosphatase, type I
				W1DHW4	Ferrous iron transport periplasmic protein EfeO,contains peptidase-M75 domain and (Frequently) cupredoxin-like domain	2.84299						W1DHB5	HD-GYP domain
				W1DI31	Acetyl-coenzyme A carboxylase carboxyl transferase subunit beta	2.61173						W1DHD9	Aspartate carbamoyltransferase
				W1DI78	Homoserine dehydrogenase	3.02412						W1DHG4	Histidine--tRNA ligase
				W1DI94	Chaperone protein HtpG	1.23748						W1DHG6	Fructose repressor FruR, LacI family
				W1DIA2	S-ribosylhomocysteine lyase	1.16993						W1DHH6	Enoyl-CoA hydratase / Delta(3)-cis-delta(2)-trans-enoyl-CoA isomerase / 3-hydroxyacyl-CoA dehydrogenase / 3-hydroxybutyryl-CoA epimerase
				W1DIA8	Uncharacterized protein	1.03025						W1DHL0	YaaH protein
				W1DIB1	Ferrichrome-iron receptor	1.12165						W1DHL5	Chaperone protein DnaJ
				W1DIM5	Acetolactate synthase large subunit	2.02						W1DHL7	N-acetylglucosamine-1-phosphate uridyltransferase / Glucosamine-1-phosphate N-acetyltransferase
				W1DIN8	Methionine import ATP-binding protein MetN	3.67841						W1DHP6	NADPH:quinone oxidoreductase 2
				W1DIR3	4-hydroxy-2-oxoglutarate aldolase @ 2-dehydro-3-deoxyphosphogluconate aldolase	3.047						W1DHP8	Protein GrpE
				W1DIR7	Aspartokinase	1.55911						W1DHQ3	Dihydrolipoamide acetyltransferase component of pyruvate dehydrogenase complex
				W1DIS2	Zinc ABC transporter, periplasmic-binding protein ZnuA	2.4628						W1DHT4	Endopeptidase La
				W1DIT2	Branched-chain amino acid ABC transporter, amino acid-binding protein (TC 3.A.1.4.1)	1.67686						W1DHX2	Succinate dehydrogenase iron-sulfur subunit
				W1DIU3	Pectinesterase	1.36269						W1DHZ6	Chromosome partition protein MukB
				W1DIV4	YciL protein	3.00784						W1DI34	ATP-dependent protease La Type I
				W1DIW7	Alcohol dehydrogenase Acetaldehyde dehydrogenase	2.83827						W1DI41	Alkyl hydroperoxide reductase protein C
				W1DIZ3	Glutamate synthase [NADPH] small chain	2.6541						W1DI68	Elongation factor P
				W1DJ01	Putative cytochrome d ubiquinol oxidase subunit III (Cytochrome bd-I oxidase subunit III)	2.54826						W1DI75	Galactokinase
				W1DJ25	PTS system, N-acetylglucosamine-specific IIA component / PTS system,N-acetylglucosamine-specific IIB component / PTS system, N-acetylglucosamine-specific IIC component	1.87305						W1DI82	NADH-quinone oxidoreductase subunit B
				W1DJ54	Tryptophan synthase alpha chain	3.52074						W1DI85	Glucosamine--fructose-6-phosphate aminotransferase [isomerizing]
				W1DJ87	ATP synthase subunit delta	1.09045						W1DI98	Outer membrane protein assembly factor BamD
				W1DJE2	Efflux pump membrane transporter	5.34849						W1DIA3	Oligopeptidase A
				W1DJF2	GMP synthase (glutamine-hydrolyzing)	3.19349						W1DIC3	Aconitate hydratase
				W1DJF8	Formyltetrahydrofolate deformylase	1.00887						W1DID1	DNA gyrase subunit A
				W1DJI7	Probable exported protein YPO4070	1.36219						W1DID6	Glycerol-3-phosphate dehydrogenase
				W1DJJ5	Homolog of E. coli HemX protein	3.38704						W1DIE5	Aspartate-semialdehyde dehydrogenase
				W1DJJ8	Periplasmic serine endoprotease DegP-like	1.90501						W1DIF0	Glycerophosphoryl diester phosphodiesterase,periplasmic
				W1DJK6	Outer membrane protein X	1.22818						W1DIF3	Transcription termination factor Rho
				W1DJN6	30S ribosomal protein S11	1.21599						W1DIH3	Glucose-6-phosphate 1-dehydrogenase
				W1DJP3	NAD(P)H-flavin reductase	2.25984						W1DIH6	Acetate kinase
				W1DJQ9	Fructose-1,6-bisphosphatase, type I	1.21999						W1DII4	Succinate dehydrogenase hydrophobic membrane anchor subunit
				W1DJT4	Peptidylprolyl isomerase	1.6683						W1DIL9	Protein translocase subunit SecE
				W1DJV2	50S ribosomal protein L19	2.34348						W1DIM3	Probable cytosol aminopeptidase
				W1DJW4	Anthranilate synthase, amidotransferase component / Anthranilate phosphoribosyltransferase	4.79892						W1DIM6	LPS-assembly protein LptD
				W1DJW6	Glucokinase	1.38025						W1DIN0	Deoxyribose-phosphate aldolase
				W1DJX9	Efflux pump membrane transporter	2.11885						W1DIN2	Ribosomal RNA large subunit methyltransferase J
				W1DK12	Periplasmic protein related to spheroblast formation	1.29518						W1DIN9	Putative membrane protein
				W1DK16	Uncharacterized protein	3.74464						W1DIP6	ATP-dependent RNA helicase RhlB
				W1DK31	Exodeoxyribonuclease III	1.23761						W1DIQ2	Regulator of length of O-antigen component of lipopolysaccharide chains
				W1DK40	Molybdopterin biosynthesis Mog protein,molybdochelatase	1.78708						W1DIQ6	UDP-glucose dehydrogenase
				W1DK62	Hypothetical oxidoreductase YqhD	2.22863						W1DIR4	Succinate--CoA ligase [ADP-forming] subunit beta
				W1DK66	Threonine synthase	2.96032						W1DIR6	NADH-quinone oxidoreductase subunit F
				W1DKB7	Ketol-acid reductoisomerase	3.93626						W1DIT4	PTS system, trehalose-specific IIB component / PTS system, trehalose-specific IIC component
				W1DKE2	Formate-dependent phosphoribosylglycinamide formyltransferase	3.78685						W1DIV3	Glutaminyl-tRNA synthetase
				W1DKH1	3-dehydroquinate synthase	2.03961						W1DIW8	Negative modulator of initiation of replication
				W1DKI8	Serine hydroxymethyltransferase	1.10775						W1DIX0	Outer membrane protein C
				W1DKM5	Protein-export membrane protein SecF	1.04435						W1DIY2	Lysine decarboxylase, inducible
				W1DKS8	4-alpha-glucanotransferase (Amylomaltase)	1.88849						W1DJ05	Malate dehydrogenase
				W1DKU9	Putative oxidoreductase	1.06081						W1DJ29	PTS system, maltose and glucose-specific IIC component / PTS system, maltose and glucose-specific IIB component
				W1DKW4	Phosphatidylserine decarboxylase proenzyme	1.67996						W1DJ43	Galactose operon repressor, GalR-LacI family of transcriptional regulators
				W1DKZ0	Pyruvate formate-lyase	2.49611						W1DJ47	Protein HflC
				W1DL10	Tartrate dehydrogenase / Tartrate decarboxylase / D-malic enzyme	1.86882						W1DJ52	2-Keto-3-deoxy-D-manno-octulosonate-8-phosphate synthase
				W1DL74	Oligopeptide ABC transporter, periplasmic oligopeptide-binding protein OppA (TC 3.A.1.5.1)	1.19089						W1DJ53	23S rRNA (guanosine-2-O-)-methyltransferase RlmB
				W1DL78	Alcohol dehydrogenase Acetaldehyde dehydrogenase	2.02082						W1DJ61	2-amino-3-ketobutyrate coenzyme A ligase
				W1DLA2	Glutamate synthase [NADPH] small chain	3.29633						W1DJ65	Uncharacterized acetyltransferase YjgM
				W1DLB4	ADP-heptose synthase / D-glycero-beta-D-manno-heptose 7-phosphate kinase	1.84874						W1DJ81	Glutamine--fructose-6-phosphate aminotransferase [isomerizing]
				W1DLB6	Carbamoyl-phosphate synthase small chain	2.64432						W1DJA4	Glycoprotein-polysaccharide metabolism
				W1DLE1	Enoyl-[acyl-carrier-protein] reductase [NADH]	1.30824						W1DJB3	3-to-5 exoribonuclease RNase R
				W1DLE2	Protein YicC	3.50021						W1DJE3	Oligopeptide ABC transporter, periplasmic oligopeptide-binding protein OppA (TC 3.A.1.5.1)
				W1DLE5	Uncharacterized protein	3.31141						W1DJE4	Ribonucleotide reductase of class III (Anaerobic), large subunit
				W1DLJ0	ClpXP protease specificity-enhancing factor / Stringent starvation protein B	3.31177						W1DJE8	Thymidine kinase
				W1DLT9	Blue copper oxidase CueO	2.51418						W1DJG2	Ion-translocating oxidoreductase complex subunit G
				W1DLU1	Nitrite reductase [NAD(P)H] large subunit	2.80768						W1DJG7	Glutathione S-transferase
				W1DLV8	OsmC/Ohr family protein	1.25572						W1DJH6	Transcriptional regulator SlyA
				W1DLW9	UDP-3-O-(3-hydroxymyristoyl)glucosamine N-acyltransferase	4.70313						W1DJJ0	Ribulosamine/erythrulosamine 3-kinase potentially involved in protein deglycation
				W1DLY8	50S ribosomal protein L18	1.9659						W1DJJ1	50S ribosomal protein L13
				W1DM00	Chaperone protein ClpB	1.3147						W1DJJ6	DNA-directed RNA polymerase subunit omega
				W1DM02	LSU ribosomal protein L3p (L3e)	1.04438						W1DJL7	Isoleucine--tRNA ligase
				W1DM05	Ribosome hibernation protein YfiA	2.2526						W1DJL8	Transcription-repair coupling factor
				W1DM35	Formiminoglutamase	1.69744						W1DJL9	Translation elongation factor P Lys34:lysine transferase
				W1DM86	S-adenosylmethionine synthetase	2.84559						W1DJN9	FIG021952: putative membrane protein
				W1DM92	Periplasmic protein YqjC	3.73061						W1DJQ1	30S ribosomal protein S3
				W1DMA2	D-3-phosphoglycerate dehydrogenase	2.98844						W1DJQ3	Alcohol dehydrogenase
				W1DMB9	Bifunctional purine biosynthesis protein PurH	4.07656						W1DJS7	Glutathione S-transferase, omega
				W1DMD1	Protein involved in stability of MscS mechanosensitive channel	1.19984						W1DJT7	1,4-dihydroxy-2-naphthoyl-CoA synthase
				W1DMD2	Phosphoenolpyruvate carboxylase	1.36472						W1DJV6	Signal recognition particle protein
				W1DMM4	UDP-N-acetylmuramate:L-alanyl-gamma-D-glutamyl-meso-diaminopimelate ligase	2.35581						W1DJW9	Putative phosphosugar isomerase
				W1DMP0	TonB-dependent hemin, ferrichrome receptor	4.20535						W1DJY3	Acetyl-coenzyme A synthetase
				W1DMW8	Valine--tRNA ligase	1.68719						W1DJZ9	High frequency lysogenization protein HflD homolog
				W1DMY3	Methionine ABC transporter substrate-binding protein	3.10625						W1DK11	Chaperone FimC
				W1DN03	Acylphosphatase	3.27967						W1DK45	Elongation factor G
				W1DN14	Trp operon repressor	1.36758						W1DK84	(3R)-hydroxymyristoyl-[acyl carrier protein] dehydratase
				W1DN30	3-phosphoshikimate 1-carboxyvinyltransferase	2.50987						W1DK92	Chorismate mutase I / Prephenate dehydratase
				W1DN36	Glycine dehydrogenase (aminomethyl-transferring)	1.2473						W1DK99	Protein translocase subunit SecY
				W1DN54	Elongation factor P-like protein	3.53654						W1DKA8	30S ribosomal protein S17
				W1DN78	Formyltetrahydrofolate deformylase	3.8823						W1DKB8	Universal stress protein G
				W1DN89	Sulfite reductase [NADPH] flavoprotein alpha-component	5.06905						W1DKC0	Uncharacterized protein
				W1DN93	Glutamate synthase [NADPH] large chain	2.77021						W1DKC9	ATP-dependent RNA helicase SrmB
				W1DNB9	50S ribosomal protein L10	1.32012						W1DKI0	Outer membrane lipoprotein Blc
				W1DND2	UDP-N-acetylmuramoylalanyl-D-glutamate--2,6-diaminopimelate ligase	1.37954						W1DKK2	Na(+)-translocating NADH-quinone reductase subunit A
				W1DNF1	6,7-dimethyl-8-ribityllumazine synthase	2.22697						W1DKL7	Xanthine phosphoribosyltransferase
				W1DNH5	YheO-like PAS domain	1.49681						W1DKM1	Inhibitor of vertebrate lysozyme
				W1DNK3	FIG094199: Fumarylacetoacetate hydrolase	2.74876						W1DKM3	Phosphatase NudJ
				W1DNN3	Diaminopimelate decarboxylase	3.26965						W1DKN3	NADH-ubiquinone oxidoreductase chain G
				W1DNN4	Formate dehydrogenase H @ selenocysteine-containing	1.92499						W1DKN7	NADH-quinone oxidoreductase subunit A
				W1DNP3	Isochorismatase [enterobactin] siderophore / Apo-aryl carrier domain of EntB	4.59469						W1DKQ1	Aldose 1-epimerase
				W1DNQ6	Aspartate-semialdehyde dehydrogenase	3.19268						W1DKQ7	Glutamate--cysteine ligase
				W1DNS8	ATP-dependent hsl protease ATP-binding subunit HslU	1.84326						W1DKR1	Translational regulator CsrA
				W1DNX9	Predicted outer membrane lipoprotein YfeY	4.46702						W1DKR8	Arylsulfatase
				W1DNZ4	30S ribosomal protein S8	1.05846						W1DKS9	Transcriptional regulator, PadR family
				W1DNZ8	50S ribosomal protein L29	1.23864						W1DKV0	Nucleoside-specific channel-forming protein Tsx
				W1DNZ9	Ribosome-binding factor A	1.166						W1DKV8	NADH-quinone oxidoreductase subunit C/D
				W1DP39	Argininosuccinate synthase	4.01023						W1DKX0	3-to-5 exoribonuclease RNase R
				W1DP44	PTS system, glucose-specific IIB component / PTS system, glucose-specific IIC component	4.46319						W1DKZ6	L-threonine 3-dehydrogenase
				W1DP55	YrbA protein	1.41377						W1DL15	Glycogen synthase, ADP-glucose transglucosylase
				W1DP59	Shikimate kinase 1	1.06036						W1DL27	Peroxidase
				W1DPA3	Phosphoglycerate kinase	1.17343						W1DL35	Succinate--CoA ligase [ADP-forming] subunit alpha
				W1DPC6	Acetylglutamate kinase	1.78462						W1DL53	Probable malate:quinone oxidoreductase
				W1DPE3	NAD(P) transhydrogenase subunit beta	2.66871						W1DL55	Fructose-1,6-bisphosphatase, GlpX type
				W1DPG1	Phosphoenolpyruvate-protein phosphotransferase of PTS system	3.07286						W1DL95	Respiratory nitrate reductase alpha chain
				W1DPH9	NAD(P) transhydrogenase subunit alpha	2.5084						W1DLA7	30S ribosomal protein S9
				W1DPK2	TldE protein, part of TldE/TldD proteolytic complex	3.02373						W1DLA9	Cytochrome d ubiquinol oxidase subunit I
				W1DPK3	PTS system, glucose-specific IIA component	1.50805						W1DLB5	Malate dehydrogenase
				W1DPM0	Aspartyl-tRNA synthetase	1.23343						W1DLB7	Diaminobutyrate--2-oxoglutarate aminotransferase
				W1DPM4	Iron-sulfur cluster assembly protein SufD	2.91614						W1DLB8	UDP-N-acetylmuramoyl-tripeptide--D-alanyl-D-alanine ligase
				W1DPM5	Uncharacterized protein ImpJ/VasE,Type VI secretion system baseplate subunit TssK	3.2356						W1DLC1	Trehalose-6-phosphate hydrolase
				W1DPQ3	Probable transcriptional regulatory protein	1.2415						W1DLD2	Ribonuclease PH
				W1DPR6	Uncharacterized protein YfaZ	3.1186						W1DLE3	30S ribosomal protein S16
				W1DPS4	Transketolase, C-terminal section	3.65075						W1DLF3	Phospho-N-acetylmuramoyl-pentapeptide-transferase
				W1DPS7	D-alanyl-D-alanine carboxypeptidase	2.0989						W1DLG0	DNA-binding protein H-NS
				W1DQ07	Phosphopantothenoylcysteine decarboxylase / Phosphopantothenoylcysteine synthetase	1.16315						W1DLJ4	Phosphoenolpyruvate synthase
				W1DQ14	TonB-dependent receptor Outer membrane receptor for ferric enterobactin and colicins B, D	4.85605						W1DLL8	Similarity with glutathionylspermidine synthase, group 1
				W1DQ52	Outer membrane protein F	1.41341						W1DLM3	PTS system, cellobiose-specific IIB component
				W1DQ53	Lipoprotein NlpD	1.45613						W1DLM5	Purine-nucleoside phosphorylase
				W1DQA5	Putative aldo/keto reductase	3.10971						W1DLN7	Succinate-semialdehyde dehydrogenase [NAD] Succinate-semialdehyde dehydrogenase [NADP+]
				W1DQB9	Leucine-responsive regulatory protein, regulator for leucine (Or lrp) regulon and high-affinity branched-chain amino acid transport system	1.05526						W1DLP1	Carbon starvation protein A paralog
				W1DQC3	UPF0482 protein	4.36366						W1DLP8	Delta-aminolevulinic acid dehydratase
				W1DQD7	Uncharacterized protein	3.43218						W1DLT4	Molybdenum cofactor biosynthesis protein B
				W1DQH9	Septum site-determining protein MinC	1.96947						W1DLU3	Peptidyl-prolyl cis-trans isomerase
				W1DQJ6	Acetylornithine aminotransferase / N-succinyl-L,L-diaminopimelate aminotransferase	3.72111						W1DLU6	Phosphoglycolate phosphatase
				W1DQK4	Sulfate and thiosulfate binding protein CysP	3.3917						W1DLW1	L,D-transpeptidase YbiS
				W1DQR7	Argininosuccinate synthase	2.55049						W1DLY1	Galactose-1-phosphate uridylyltransferase
				W1DQW8	D-lactate dehydrogenase	2.68225						W1DLY3	GMP synthase [glutamine-hydrolyzing],amidotransferase subunit / GMP synthase [glutamine-hydrolyzing], ATP pyrophosphatase subunit
				W1DQZ6	Cell division protein ZapA	2.84841						W1DLY4	30S ribosomal protein S13
				W1DR04	Trehalose 6-phosphate phosphatase	3.34314						W1DLZ8	50S ribosomal protein L22
				W1DR26	N-acetyl-gamma-glutamyl-phosphate reductase	4.50265						W1DM18	Inner membrane protein YqjE
				W1DR34	FIG004454: RNA binding protein	2.50943						W1DM31	Class B acid phosphatase
				W1DR50	UDP-N-acetylglucosamine 1-carboxyvinyltransferase	1.45477						W1DM48	Homolog of E. coli HemY protein
				W1DR72	Osmotically inducible lipoprotein E	1.07161						W1DM51	Acetyl-coenzyme A carboxyl transferase alpha chain
				W1DRB1	Phenylalanine--tRNA ligase beta subunit	3.01742						W1DM54	Putative stomatin/prohibitin-family membrane protease subunit YbbK
				W1DRB5	Translation initiation factor IF-3	1.09768						W1DM58	Phosphoribosylformylglycinamidine synthase,synthetase subunit / Phosphoribosylformylglycinamidine synthase, glutamine amidotransferase subunit
				W1DRD3	Quinolinate phosphoribosyltransferase [decarboxylating]	3.51098						W1DM75	50S ribosomal protein L23
				W1DRD8	Aromatic amino acid transport protein AroP	4.47602						W1DM79	Bacterioferritin
				W1DRE1	Protein ydgH	1.71423						W1DM82	Chromosome (Plasmid) partitioning protein ParB
				W1DRE5	NAD(P) transhydrogenase subunit beta	3.5811						W1DM87	Phosphate acetyltransferase
				W1DRF1	Formate hydrogenlyase subunit 5	3.2143						W1DMB0	CDP-diacylglycerol--serine O-phosphatidyltransferase
				W1DRG2	Phosphotransferase system, phosphocarrier protein HPr	5.06346						W1DMC5	Ribose-5-phosphate isomerase A
				W1DRH0	6-phosphogluconate dehydrogenase, decarboxylating	1.3475						W1DMD5	Transketolase
				W1DRH7	Phenylalanyl-tRNA synthetase beta chain	5.28626						W1DME7	Peptide methionine sulfoxide reductase MsrA
				W1DRJ3	Lipid A 1-diphosphate synthase	1.5655						W1DMF9	Nicotinamidase family protein YcaC
				W1DRL3	Ribonucleoside-diphosphate reductase subunit beta	4.75823						W1DMG4	YcfF/hinT protein: a purine nucleoside phosphoramidase
				W1DRS4	Amidophosphoribosyltransferase	3.70453						W1DMJ5	NAD synthetase
				W1DRW4	Uncharacterized protein ImpA ,Type VI secretion protein	3.17707						W1DMK8	Alanine--tRNA ligase
				W1DRX9	Sulfite reductase [NADPH] hemoprotein beta-component	1.9797						W1DMM9	Transcriptional regulatory protein RcsB
				W1DRY5	Solute-binding periplasmic protein of iron/siderophore ABC transporter	3.40933						W1DMN7	Hypothetical oxidoreductase YqhD
				W1DRZ3	Pantothenate synthetase	4.58537						W1DMQ4	GTPase Der
				W1DSA4	NADPH-dependent 7-cyano-7-deazaguanine reductase	3.67419						W1DMU8	Sigma factor RpoE negative regulatory protein RseB
				W1DSB4	Dipeptidyl carboxypeptidase Dcp	1.95153						W1DMV9	Hypothetical tRNA/rRNA methyltransferase yfiF
				W1DSG2	Promiscuous sugar phosphatase YidA, haloacid dehalogenase-like phosphatase family	4.69798						W1DMX5	PTS system, mannose-specific IIA component / PTS system, mannose-specific IIB component
				W1DSJ4	Regulator of ribonuclease activity A	2.45246						W1DMY1	Phosphopantetheine adenylyltransferase
				W1DSK2	NAD-dependent glyceraldehyde-3-phosphate dehydrogenase	1.58733						W1DN04	ATP-dependent helicase HrpA
				W1DSL0	Probable protein kinase UbiB	1.19657						W1DN07	Orotate phosphoribosyltransferase
				W1DSN9	Trehalose-6-phosphate synthase	2.74415						W1DN11	Cytochrome d ubiquinol oxidase subunit I
				W1DSU3	Ubiquinone/menaquinone biosynthesis C-methyltransferase UbiE	2.35208						W1DN20	Diaminobutyrate--2-oxoglutarate aminotransferase
				W1DSU9	Enolase	1.65222						W1DN35	30S ribosomal protein S21
				W1DSY1	UDP-N-acetylglucosamine 1-carboxyvinyltransferase	2.44268						W1DN39	Peptidyl-prolyl cis-trans isomerase
				W1DT03	Uncharacterized protein	3.17436						W1DN41	L-Proline/Glycine betaine transporter ProP
				W1DT73	Methylenetetrahydrofolate reductase	5.00929						W1DN42	Chromosome partition protein MukB
				W1DTA1	Cysteine synthase	1.44996						W1DN59	Uncharacterized protein
				W1DTB3	N-acetylglucosamine-6-phosphate deacetylase	4.1465						W1DN82	LSU ribosomal protein L28p
				W1DTF5	Histidinol-phosphate aminotransferase	3.82073						W1DN92	D-mannonate oxidoreductase
				W1DTL1	Uncharacterized membrane lipoprotein clustered with tellurite resistance proteins TehA/TehB	3.45458						W1DNA2	Aspartate 1-decarboxylase
				W1DTN1	5-hydroxyisourate hydrolase	3.03389						W1DNA3	Phosphopentomutase
				W1DTS0	Dipeptidyl carboxypeptidase Dcp	1.78677						W1DNC4	DNA-directed RNA polymerase subunit
				W1DTU1	Lead, cadmium, zinc and mercury transporting ATPase Copper-translocating P-type ATPase	1.64267						W1DNC9	Lipoprotein NlpD
				W1DTU5	Lipoprotein	3.67423						W1DNE4	Putative exported protein
				W1DU04	Cell division protein FtsZ	1.66624						W1DNI0	Putative phosphoenolpyruvate synthase regulatory protein
				W1DU13	GMP reductase	1.6775						W1DNJ1	Thiamine-monophosphate kinase
				W1DU16	21 kDa hemolysin	2.09468						W1DNJ8	Peptidyl-prolyl cis-trans isomerase
				W1DU54	3-hydroxypropionate dehydrogenase	2.73321						W1DNK1	Deoxyribose-phosphate aldolase
				W1DU59	Imidazole glycerol phosphate synthase subunit HisF	3.49738						W1DNK6	Ribulose-phosphate 3-epimerase
				W1DU66	Glutamine synthetase	2.79528						W1DNK8	Septum site-determining protein MinD
				W1DUA5	Outer membrane protein A	1.267						W1DNQ9	3-oxoacyl-[acyl-carrier-protein] synthase, KASI
				W1DUD5	Signal peptidase I	1.21143						W1DNR8	Putative oxidoreductase YncB
				W1DUG1	Probable haloacid dehalogenase-like hydrolase STY3852	1.63936						W1DNS4	Peptidyl-prolyl cis-trans isomerase
				W1DUH4	Glutamate transport ATP-binding protein	1.93451						W1DNS6	Transcriptional regulator, TetR family
				W1DUJ4	Uncharacterized protein	5.15575						W1DNV4	Tryptophanyl-tRNA synthetase
				W1DUQ9	Maltose/maltodextrin ABC transporter, permease protein MalF	3.72727						W1DNV6	D-alanyl-D-alanine carboxypeptidase
				W1DUS4	Asparagine--tRNA ligase	1.25867						W1DNW6	ATP-dependent protease subunit HslV
				W1DUV2	Alkanesulfonate utilization operon LysR-family regulator CbI	4.79754						W1DNZ7	SSU ribosomal protein S1p
				W1DV09	Polyphosphate kinase	3.822						W1DP13	Chromosome (Plasmid) partitioning protein ParA
				W1DV94	Histidine biosynthesis bifunctional protein HisB	1.27653						W1DP47	Transcription elongation factor GreA
				W1DV95	Asparagine synthetase [glutamine-hydrolyzing]	3.70073						W1DP51	Uncharacterized PLP-dependent aminotransferase YfdZ
				W1DVC7	Putative formate dehydrogenase oxidoreductase protein	5.00466						W1DP52	Biosynthetic arginine decarboxylase
				W1DVJ7	Amidophosphoribosyltransferase	1.49721						W1DP87	NADH-ubiquinone oxidoreductase chain G
				W1DVK8	Putative oxidoreductase	1.43758						W1DP98	Uncharacterized protein
				W1DVN8	Phosphoribosylaminoimidazole-succinocarboxamide synthase	4.27788						W1DPA9	UDP-sugar hydrolase 5-nucleotidase
				W1DVW2	Putative fimbrial-like protein	1.20244						W1DPB8	NAD(P)H-flavin oxidoreductase
				W1DVX9	Ribonuclease E	2.1754						W1DPE9	Methylglyoxal reductase, acetol producing / 2,5-diketo-D-gluconate reductase A
				W1DW50	Predicted membrane fusion protein (MFP) component of efflux pump, membrane anchor protein YbhG	2.80271						W1DPF2	Aminomethyltransferase
				W1DW60	Glucans biosynthesis protein G	2.59186						W1DPF7	Outer membrane protein YfgL, lipoprotein component of the protein assembly complex (Forms a complex with YaeT, YfiO, and NlpB)
				W1DWC4	LPS-assembly lipoprotein LptE	3.17768						W1DPG6	Ethanolamine utilization polyhedral-body-like protein EutL
				W1DXU9	Uncharacterized protein ImpH/VasB,Type VI secretion protein, family	4.09208						W1DPH2	Short chain dehydrogenase
												W1DPI1	Phenylalanyl-tRNA synthetase beta chain
												W1DPI2	Succinate-semialdehyde dehydrogenase [NAD] Succinate-semialdehyde dehydrogenase [NADP+]
												W1DPJ4	ATP-dependent Clp protease ATP-binding subunit ClpA
												W1DPM6	Uracil-DNA glycosylase
												W1DPM7	Threonine--tRNA ligase
												W1DPP2	Soluble lytic murein transglycosylase
												W1DPP5	Right origin-binding protein
												W1DPU0	Glycerol-3-phosphate dehydrogenase
												W1DPU4	PTS system, mannose-specific IID component
												W1DPV2	Maf-like protein
												W1DPW4	Phosphoadenosine phosphosulfate reductase
												W1DPX5	Mannonate dehydratase
												W1DPY9	Probable phosphoglycerate mutase GpmB
												W1DQ09	Oxidoreductase
												W1DQ10	1,3-propanediol dehydrogenase
												W1DQ33	UDP-N-acetylmuramoylalanyl-D-glutamate--2,6-diaminopimelate ligase
												W1DQ51	C4-dicarboxylate transport protein
												W1DQ75	Transcription antitermination protein NusB
												W1DQ81	Histidine ammonia-lyase
												W1DQ82	Epi-inositol hydrolase
												W1DQ92	Lysine-arginine-ornithine-binding periplasmic protein (TC 3.A.1.3.1)
												W1DQA8	Nucleoside permease
												W1DQB4	Lipoate-protein ligase A
												W1DQD2	DNA-directed RNA polymerase beta subunit
												W1DQE2	RNA polymerase sigma factor RpoS
												W1DQG6	Putative oxidoreductase
												W1DQH0	Fatty acid metabolism regulator protein
												W1DQH1	Arginine ABC transporter, periplasmic arginine-binding protein ArtI
												W1DQJ2	Cyclic AMP receptor protein
												W1DQJ5	ATP-dependent hsl protease ATP-binding subunit HslU
												W1DQK3	Tryptophanyl-tRNA synthetase
												W1DQK5	Serine protein kinase (PrkA protein), P-loop containing
												W1DQK9	Predicted dye-decolorizing peroxidase (DyP),YfeX-like subgroup
												W1DQN0	Phosphoenolpyruvate-dihydroxyacetone phosphotransferase, dihydroxyacetone binding subunit DhaK
												W1DQN6	Uroporphyrinogen decarboxylase
												W1DQN8	MltA-interacting protein MipA
												W1DQQ4	DNA polymerase III beta subunit
												W1DQQ6	Polyribonucleotide nucleotidyltransferase
												W1DQR0	Inosine-uridine preferring nucleoside hydrolase
												W1DQR2	Translation initiation factor IF-2
												W1DQR5	Copper-sensing two-component system response regulator CpxR
												W1DQS5	Methionine aminopeptidase
												W1DQS7	DNA gyrase subunit B
												W1DQS9	Uridylate kinase
												W1DQT2	UvrABC system protein A
												W1DQU2	5-methylthioadenosine/S-adenosylhomocysteine nucleosidase
												W1DQU5	Putative carboxymethylenebutenolidase
												W1DQV6	Arginine decarboxylase
												W1DQW7	Cof protein, HD superfamily hydrolase
												W1DQX3	Arginine--tRNA ligase
												W1DQY7	Polyribonucleotide nucleotidyltransferase
												W1DR11	Putative metalloprotease yggG
												W1DR16	Ferritin-like protein 2
												W1DR17	Phosphoglucosamine mutase
												W1DR25	N-3-oxohexanoyl-L-homoserine lactone quorum-sensing transcriptional activator @ N-3-oxooctanoyl-L-homoserine lactone quorum-sensing transcriptional activator
												W1DR29	D-cysteine desulfhydrase
												W1DR40	GTP pyrophosphokinase, (P)ppGpp synthetase I / Guanosine-3,5-bis(Diphosphate) 3-pyrophosphohydrolase
												W1DR83	Catalase
												W1DRB3	Two-component system response regulator OmpR
												W1DRB8	PTS system, mannitol-specific IIC component / PTS system, mannitol-specific IIB component / PTS system, mannitol-specific IIA component
												W1DRC7	DcrB protein
												W1DRC9	Formate hydrogenlyase subunit 7
												W1DRE6	Aspartyl-tRNA synthetase
												W1DRF5	AmpE protein
												W1DRI4	PTS system, mannose-specific IIB component
												W1DRI7	Lysyl-tRNA synthetase (Class II)
												W1DRL4	Aconitate hydratase B
												W1DRQ1	Peptidyl-prolyl cis-trans isomerase
												W1DRT0	Mlc, transcriptional repressor of MalT (The transcriptional activator of maltose regulon) and manXYZ operon
												W1DRT6	5-keto-2-deoxygluconokinase / uncharacterized domain
												W1DRY3	Pyridoxine 5-phosphate synthase
												W1DRZ9	Myo-inositol 2-dehydrogenase 1
												W1DS03	Inosose dehydratase
												W1DS25	Thioredoxin reductase
												W1DS39	Iron-sulfur cluster regulator IscR
												W1DSA1	Peptidoglycan-associated protein
												W1DSB8	ABC transport system, permease component YbhS
												W1DSC3	Serine protein kinase (PrkA protein), P-loop containing
												W1DSD8	Thiol:disulfide interchange protein
												W1DSF5	Possible oxidoreductase
												W1DSH0	Thymidylate synthase
												W1DSI1	Formate dehydrogenase O alpha subunit @ selenocysteine-containing
												W1DSI4	30S ribosomal protein S2
												W1DSK3	S-methylmethionine permease
												W1DSM5	Uncharacterized protein
												W1DSN0	UTP--glucose-1-phosphate uridylyltransferase
												W1DSN1	Ferrichrome-iron receptor
												W1DSQ1	Maltodextrin-binding protein
												W1DSQ2	Ferritin
												W1DSS9	Glucose-1-phosphate adenylyltransferase
												W1DST5	Uncharacterized protein
												W1DSV0	Glucose-1-phosphate adenylyltransferase
												W1DSW3	Phosphoheptose isomerase
												W1DSW8	LysR family transcriptional regulator YafC
												W1DSY5	6-phospho-beta-glucosidase
												W1DSZ4	Arsenate reductase
												W1DT07	Exopolyphosphatase
												W1DT78	Protein ydgH
												W1DT79	Lysyl-tRNA synthetase (Class II)
												W1DT87	Fumarate and nitrate reduction regulatory protein
												W1DT92	Glycine dehydrogenase [decarboxylating] (Glycine cleavage system P protein)
												W1DTA0	Pyruvate kinase
												W1DTA2	PTS system, N-acetylglucosamine-specific IIA component / PTS system,N-acetylglucosamine-specific IIB component / PTS system, N-acetylglucosamine-specific IIC component
												W1DTD3	Dihydrolipoamide acetyltransferase component of pyruvate dehydrogenase complex
												W1DTI0	Glucosamine--fructose-6-phosphate aminotransferase [isomerizing]
												W1DTJ5	Carbonic anhydrase
												W1DTL4	Spermidine synthase
												W1DTM0	Protein HflK
												W1DTT0	Oxidoreductase
												W1DTT3	Lipid A export ATP-binding/permease protein MsbA
												W1DTV3	NAD(P)H dehydrogenase (quinone)
												W1DTV4	tRNA-modifying protein YgfZ
												W1DTZ5	Propanediol dehydratase small subunit
												W1DTZ9	Glycerol-3-phosphate acyltransferase
												W1DU33	COG1399 protein, clustered with ribosomal protein L32p
												W1DU62	Cell division protein ZapD
												W1DU80	Formate dehydrogenase O beta subunit
												W1DU93	Leucyl-tRNA synthetase
												W1DUB1	Ribonucleotide reductase of class Ia (Aerobic),alpha subunit
												W1DUB3	Peptidase B
												W1DUC5	Uncharacterized protein
												W1DUC7	UTP--glucose-1-phosphate uridylyltransferase
												W1DUH1	Phosphoribosylformylglycinamidine synthase,synthetase subunit / Phosphoribosylformylglycinamidine synthase, glutamine amidotransferase subunit
												W1DUH6	Formate dehydrogenase O alpha subunit @ selenocysteine-containing
												W1DUJ7	Glucose-1-phosphate adenylyltransferase
												W1DUL8	Peptide deformylase
												W1DUP3	Ferric hydroxamate outer membrane receptor FhuA
												W1DUQ2	Cytoplasmic copper homeostasis protein CutC
												W1DUR3	Maltoporin (Maltose/maltodextrin high-affinity receptor, phage lambda receptor protein)
												W1DUS3	UvrABC system protein C
												W1DUX7	Iron-sulfur cluster carrier protein
												W1DUZ0	Pyruvate kinase
												W1DUZ1	D-Lactate dehydrogenase
												W1DUZ3	C4-type zinc finger protein, DksA/TraR family
												W1DV12	Phosphoenolpyruvate carboxykinase [ATP]
												W1DVG6	Ribosomal RNA large subunit methyltransferase M
												W1DVJ8	DNA-binding protein
												W1DW28	dTDP-glucose 4,6-dehydratase
												W1DW65	DNA polymerase I
												W1DW82	Protein FdhE homolog
												W1DW86	Formate dehydrogenase O alpha subunit @ selenocysteine-containing
												W1DWC0	50S ribosomal protein L17
												W1DWD0	Uncharacterized protein
												W1DWJ3	Membrane alanine aminopeptidase N
												W1DX06	Glucosamine-6-phosphate deaminase
												W1DXA8	Uncharacterized protein
												W1DXF4	FolM Alternative dihydrofolate reductase 1
												W1DXT9	Protein translocase subunit SecA
												W1DY05	Glycosyltransferase
												W1DY12	Phosphomannomutase
												W1DY24	Elongation factor 4
												W1DYC5	Methionyl-tRNA formyltransferase
												W1DYD9	DNA protection during starvation protein

## Sheet: B1B2
Protein	Protein.name	log2(B1/B2)		Protein	Protein.name	log2(B1/B2)		Protein	Protein.name	log2(B1/B2)		Protein	Protein.name	log2(B1/B2)
W1DD55	Uncharacterized protein	6.08367		W1DCE9	Putative exported protein	1.75428		W1DDU4	Phosphate starvation-inducible ATPase PhoH with RNA binding motif	-7.81549		W1DCH6	Isocitrate lyase	-4.88386
W1DDU5	MotA/TolQ/ExbB proton channel family protein	5.45465		W1DCL9	Phosphoserine aminotransferase	3.78754		W1DE99	Succinate dehydrogenase flavoprotein subunit	-10.0463		W1DCM4	Putative cold-shock protein	-2.95702
W1DEZ4	50S ribosomal protein L31 type B	5.81632		W1DCN3	NADH dehydrogenase	1.5269		W1DFJ2	Ubiquinol oxidase subunit 2	-9.03884		W1DCS9	Putative acetyltransferase	-1.21801
W1DFL6	10 kDa chaperonin	5.88282		W1DCW0	Sulfate adenylyltransferase subunit 1	3.31243		W1DFL9	4-hydroxybenzoate transporter	-7.79578		W1DCW5	Serine--tRNA ligase	-2.16647
W1DG42	Thioredoxin	5.40472		W1DD89	Phosphoribosylamine--glycine ligase	3.00134		W1DGJ4	Succinate dehydrogenase iron-sulfur subunit	-8.75393		W1DCZ9	Two-component system response regulator OmpR	-3.97696
W1DG48	1-phosphofructokinase	6.56888		W1DDB1	Glutaredoxin	2.14167		W1DI50	NADP-dependent malic enzyme	-9.49235		W1DD01	Lactoylglutathione lyase	-4.19548
W1DGB7	Colicin I receptor	6.80315		W1DDH7	Acetolactate synthase small subunit	3.73995		W1DI85	Glucosamine--fructose-6-phosphate aminotransferase [isomerizing]	-7.63174		W1DD42	Galactose/methyl galactoside ABC transport system, D-galactose-binding periplasmic protein MglB (TC 3.A.1.2.3)	-3.12145
W1DGC0	PTS system, fructose-specific IIB component / PTS system, fructose-specific IIC component	5.52692		W1DDH8	3-oxoacyl-[acyl-carrier protein] reductase	1.44417		W1DIX8	Alpha-1,4 glucan phosphorylase	-8.92415		W1DDC0	Osmotically inducible protein OsmY	-2.80616
W1DHT2	Phospho-2-dehydro-3-deoxyheptonate aldolase	5.9133		W1DDV3	1-phosphofructokinase	3.02578		W1DIY2	Lysine decarboxylase, inducible	-7.84053		W1DDC3	3-dehydroquinate dehydratase	-3.52472
W1DIA8	Uncharacterized protein	5.27884		W1DDW4	Glutaredoxin	3.34397		W1DJ61	2-amino-3-ketobutyrate coenzyme A ligase	-9.16668		W1DDF2	GTPase HflX	-1.24469
W1DJ62	Biotin carboxyl carrier protein of acetyl-CoA carboxylase	5.86665		W1DE97	Fructose-specific phosphocarrier protein HPr / PTS system, fructose-specific IIA component	5.07467		W1DJP6	50S ribosomal protein L24	-8.05983		W1DDF7	Glutathionylspermidine synthase / Glutathionylspermidine amidohydrolase	-2.21018
W1DJK3	Ferrous iron transport periplasmic protein EfeO,contains peptidase-M75 domain and (Frequently) cupredoxin-like domain	5.47192		W1DEA9	2,3-bisphosphoglycerate-independent phosphoglycerate mutase	4.46297		W1DK11	Chaperone FimC	-7.94227		W1DDG8	Inositol-1-monophosphatase	-5.72888
W1DJM0	COG2825: Outer membrane protein	5.95818		W1DEH0	UPF0227 protein	1.96703		W1DK65	Galactokinase	-9.06545		W1DDH2	Free methionine-(R)-sulfoxide reductase, contains GAF domain	-2.92782
W1DJS3	Uncharacterized protein	5.2802		W1DEJ4	Ribosome-binding ATPase YchF	4.982		W1DKQ1	Aldose 1-epimerase	-7.71393		W1DDM1	D-alanine--D-alanine ligase	-1.9655
W1DJT2	Carbamoyl-phosphate synthase large chain	5.3487		W1DEL8	Peptidase T	3.00492		W1DLB5	Malate dehydrogenase	-9.05843		W1DDQ9	Putative sugar ABC transport system, periplasmic binding protein YtfQ	-1.52213
W1DKA8	30S ribosomal protein S17	5.61273		W1DEU9	Iron(III) dicitrate transport protein FecA	2.44032		W1DLY1	Galactose-1-phosphate uridylyltransferase	-9.10875		W1DDU8	Lysine-specific permease	-2.82599
W1DKZ0	Pyruvate formate-lyase	6.76785		W1DEZ6	Malate synthase	4.18142		W1DLY4	30S ribosomal protein S13	-8.8541		W1DDW9	Outer-membrane lipoprotein carrier protein	-2.35412
W1DL93	Candidate zinc-binding lipoprotein ZinT	5.94836		W1DF25	Anaerobic dimethyl sulfoxide reductase chain A	1.30162		W1DN11	Cytochrome d ubiquinol oxidase subunit I	-8.77224		W1DE38	GTP cyclohydrolase II	-2.30788
W1DLG0	DNA-binding protein H-NS	9.78691		W1DF62	FIG004016: Uncharacterized protein YggN	3.47014		W1DQ81	Histidine ammonia-lyase	-7.66135		W1DEE8	DNA topoisomerase 4 subunit A	-1.05833
W1DM60	50S ribosomal protein L30	7.70362		W1DF86	Phosphomethylpyrimidine synthase	1.32727		W1DQB5	Myo-inositol 2-dehydrogenase 1	-8.22411		W1DEH2	Aconitate hydratase	-1.46105
W1DMA2	D-3-phosphoglycerate dehydrogenase	5.95053		W1DF95	ThiJ/PfpI family protein	3.55777		W1DR89	Phosphoenolpyruvate carboxykinase [ATP]	-8.8752		W1DEN3	2-oxoglutarate dehydrogenase E1 component	-3.48341
W1DML5	Uncharacterized protein	7.3889		W1DF96	Outer membrane lipoprotein pcp	3.54913		W1DRX3	Glucose-1-phosphatase	-8.04266		W1DEQ9	Formate efflux transporter (TC 2.A.44 family)	-4.40791
W1DMM3	Pyruvate formate-lyase	5.44256		W1DFB6	RNA chaperone ProQ	2.04493		W1DUW3	CTP synthase	-7.58281		W1DEU4	Inosine-5-monophosphate dehydrogenase	-4.01937
W1DN80	2,3-butanediol dehydrogenase, S-alcohol forming,(R)-acetoin-specific / Acetoin (Diacetyl) reductase	5.51211		W1DFN3	Tail-specific protease	1.76413		W1DW60	Glucans biosynthesis protein G	-7.68538		W1DEX1	Ribose ABC transport system, periplasmic ribose-binding protein RbsB (TC 3.A.1.2.1)	-2.02096
W1DN90	Zinc ABC transporter, periplasmic-binding protein ZnuA	7.94726		W1DFN9	2-isopropylmalate synthase	1.82102		W1DWJ1	Outer membrane protein W	-7.8002		W1DF36	ATP synthase subunit c	-3.36582
W1DNP4	DNA-binding protein HU-alpha	6.60726		W1DFP3	Transcriptional regulator MraZ	3.5621						W1DF40	Ribonuclease T	-2.10128
W1DNX5	Sulfate and thiosulfate binding protein CysP	5.39613		W1DFR5	Glutamine ABC transporter, periplasmic glutamine-binding protein (TC 3.A.1.3.2)	2.77074						W1DF57	Putrescine ABC transporter putrescine-binding protein PotF (TC 3.A.1.11.2)	-3.60586
W1DNZ9	Ribosome-binding factor A	5.70431		W1DFU2	Erythronate-4-phosphate dehydrogenase	2.22406						W1DF59	Endoribonuclease L-PSP	-5.19864
W1DPW4	Phosphoadenosine phosphosulfate reductase	5.47286		W1DFV4	Hypothetical lipoprotein YajG	1.29784						W1DF91	Tyrosyl-tRNA synthetase	-1.64191
W1DR72	Osmotically inducible lipoprotein E	5.56777		W1DFV9	ATP-dependent Clp protease proteolytic subunit	2.99518						W1DF98	Topoisomerase IV subunit B	-1.30641
W1DRF1	Formate hydrogenlyase subunit 5	6.52626		W1DFX7	Aspartokinase / Homoserine dehydrogenase	2.82321						W1DFB0	Manganese superoxide dismutase	-5.91976
W1DST8	Outer membrane protein F	5.22911		W1DFX9	60 kDa chaperonin	2.05372						W1DFB5	tRNA modification GTPase MnmE	-3.67138
W1DSU1	5-methyltetrahydropteroyltriglutamate--homocysteine methyltransferase	6.61156		W1DG08	Outer membrane vitamin B12 receptor BtuB	3.76264						W1DFC2	Acetolactate synthase	-3.58894
W1DT73	Methylenetetrahydrofolate reductase	7.10792		W1DG25	L-threonine dehydratase	2.31322						W1DFD6	Phosphate ABC transporter, periplasmic phosphate-binding protein PstS (TC 3.A.1.7.1)	-1.59903
W1DU44	ABC-type amino acid transport/signal transduction systems, periplasmic component/domain	8.66042		W1DG91	Oligopeptidase A	2.42752						W1DFG4	PTS IIA-like nitrogen-regulatory protein PtsN	-2.88017
W1DUJ4	Uncharacterized protein	6.27843		W1DG97	Outer membrane protein Imp, required for envelope biogenesis / Organic solvent tolerance protein	1.05831						W1DFG7	N-ethylmaleimide reductase	-3.87147
W1DVW2	Putative fimbrial-like protein	5.25393		W1DGB0	Protein yifE	1.4008						W1DFJ8	Pyridoxine/pyridoxamine 5-phosphate oxidase	-1.98774
				W1DGB5	Branched-chain-amino-acid aminotransferase	4.46898						W1DFK8	Inorganic pyrophosphatase	-4.74113
				W1DGC2	Ketol-acid reductoisomerase	4.46151						W1DFQ2	Non-specific ribonucleoside hydrolase RihC	-3.62254
				W1DGD3	Protein-export protein SecB	1.46726						W1DFQ9	Alkaline phosphatase	-6.38121
				W1DGP4	High-affinity leucine-specific transport system,periplasmic binding protein LivK (TC 3.A.1.4.1)	4.85105						W1DFR9	Lipopolysaccharide ABC transporter, ATP-binding protein LptB	-3.87749
				W1DGS7	Outer Membrane Siderophore Receptor IroN	4.59561						W1DFT0	Type 1 fimbrae adaptor subunit FimF	-4.32381
				W1DGT4	Pyruvate formate-lyase	2.84879						W1DFW8	Exoribonuclease 2	-1.61218
				W1DHF3	Type I secretion outer membrane protein, TolC	2.24865						W1DFZ7	Cytokinin riboside 5-monophosphate phosphoribohydrolase	-1.60663
				W1DHG4	Histidine--tRNA ligase	3.80499						W1DG02	PTS system, mannose-specific IIB component	-5.9046
				W1DHI3	Dihydrodipicolinate synthase	1.88722						W1DG04	Soluble pyridine nucleotide transhydrogenase	-4.4369
				W1DHM0	SSU ribosomal protein S20p	4.85961						W1DG18	Transcription termination/antitermination protein NusG	-2.83114
				W1DHM1	Glucose dehydrogenase, PQQ-dependent	2.35988						W1DG54	Transaldolase	-6.32059
				W1DHP2	Dipeptide-binding ABC transporter, periplasmic substrate-binding component (TC 3.A.1.5.2) Putative hemin-binding lipoprotein	1.65208						W1DG60	FIG136845: Rhodanese-related sulfurtransferase	-4.11766
				W1DHQ6	Maltoporin (Maltose/maltodextrin high-affinity receptor, phage lambda receptor protein)	2.37672						W1DG72	Aerobic respiration control protein arcA	-4.84157
				W1DHV4	Heat shock protein 60 family chaperone GroEL	2.47923						W1DG85	Polymyxin resistance protein ArnA_DH,UDP-glucuronic acid decarboxylase / Polymyxin resistance protein ArnA_FT, UDP-4-amino-4-deoxy-L-arabinose formylase	-2.59139
				W1DHW4	Ferrous iron transport periplasmic protein EfeO,contains peptidase-M75 domain and (Frequently) cupredoxin-like domain	4.28241						W1DGB9	DNA topoisomerase I	-1.87137
				W1DHW6	Chaperone protein DnaK	2.24176						W1DGC1	Lysine decarboxylase, inducible	-4.41981
				W1DI01	UPF0304 protein	1.22845						W1DGC3	Aconitate hydratase	-2.4796
				W1DI78	Homoserine dehydrogenase	2.68608						W1DGD0	50S ribosomal protein L3 glutamine methyltransferase	-1.49524
				W1DI91	Oxygen-insensitive NAD(P)H nitroreductase / Dihydropteridine reductase	1.95145						W1DGD8	Transcription termination factor Rho	-2.43248
				W1DI94	Chaperone protein HtpG	2.69964						W1DGE1	Phosphoenolpyruvate carboxykinase (ATP)	-5.71948
				W1DIC0	Cys regulon transcriptional activator CysB	2.83965						W1DGF2	Glucose-6-phosphate 1-dehydrogenase	-1.77545
				W1DID5	2-hydroxy-3-oxopropionate reductase	3.67526						W1DGF7	Gamma-aminobutyrate:alpha-ketoglutarate aminotransferase	-7.24198
				W1DID6	Glycerol-3-phosphate dehydrogenase	1.0105						W1DGG5	6-phosphogluconolactonase	-2.24955
				W1DIF1	Aminoacyl-histidine dipeptidase (Peptidase D)	1.88602						W1DGH4	Glutaminyl-tRNA synthetase	-1.28823
				W1DIJ6	Pyrroline-5-carboxylate reductase	1.22598						W1DGI9	Citrate synthase	-1.44707
				W1DIL4	Flavohemoprotein (Hemoglobin-like protein) (Flavohemoglobin) (Nitric oxide dioxygenase)	4.09828						W1DGJ6	DNA topoisomerase I	-3.16405
				W1DIM5	Acetolactate synthase large subunit	4.06193						W1DGK3	Aconitate hydratase	-7.11308
				W1DIN6	Phosphoglucomutase	2.81379						W1DGK4	Phosphoglucomutase	-5.97229
				W1DIR3	4-hydroxy-2-oxoglutarate aldolase @ 2-dehydro-3-deoxyphosphogluconate aldolase	1.10423						W1DGK6	Chorismate synthase	-5.13893
				W1DIS2	Zinc ABC transporter, periplasmic-binding protein ZnuA	1.67076						W1DGL0	Phosphohistidine phosphatase SixA	-2.03966
				W1DIT2	Branched-chain amino acid ABC transporter, amino acid-binding protein (TC 3.A.1.4.1)	1.72588						W1DGL2	Pseudouridine synthase	-5.47741
				W1DIT6	Adenylate kinase	1.38548						W1DGL4	Ferrous iron transport protein B	-1.25769
				W1DIV4	YciL protein	2.14241						W1DGN8	3-to-5 exoribonuclease RNase R	-1.25894
				W1DIW7	Alcohol dehydrogenase Acetaldehyde dehydrogenase	2.38607						W1DGP1	Homoserine O-succinyltransferase	-1.13162
				W1DIX1	UTP--glucose-1-phosphate uridylyltransferase	1.24854						W1DGR8	Pyrrolidone-carboxylate peptidase	-2.92644
				W1DIZ3	Glutamate synthase [NADPH] small chain	4.1553						W1DGS0	Sulfate adenylyltransferase	-2.3474
				W1DJ01	Putative cytochrome d ubiquinol oxidase subunit III (Cytochrome bd-I oxidase subunit III)	3.87793						W1DGS4	Glutamine--tRNA ligase	-4.5302
				W1DJ54	Tryptophan synthase alpha chain	2.87259						W1DGT1	Ferric uptake regulation protein	-2.27032
				W1DJ96	Enolase-phosphatase E1	1.01169						W1DGT2	Ribose ABC transport system, periplasmic ribose-binding protein RbsB (TC 3.A.1.2.1)	-1.02681
				W1DJB3	3-to-5 exoribonuclease RNase R	1.15599						W1DGV9	Transcriptional repressor of the lac operon	-1.66591
				W1DJH6	Transcriptional regulator SlyA	1.79733						W1DGW6	tRNA sulfurtransferase	-3.76151
				W1DJJ9	4-hydroxy-tetrahydrodipicolinate reductase	1.0852						W1DGW9	Periplasmic Murein Peptide-Binding Protein MppA	-2.32551
				W1DJK6	Outer membrane protein X	2.294						W1DGY1	Peptide transport periplasmic protein SapA	-2.39487
				W1DJN6	30S ribosomal protein S11	3.3576						W1DGY8	Cob(I)alamin adenosyltransferase	-1.0415
				W1DJU8	Fe/S biogenesis protein NfuA	2.54401						W1DGY9	RNA polymerase sigma factor RpoD	-1.70789
				W1DJW4	Anthranilate synthase, amidotransferase component / Anthranilate phosphoribosyltransferase	1.02357						W1DGZ2	Cyclic di-GMP-binding protein	-1.57691
				W1DJW6	Glucokinase	1.6736						W1DH07	Universal stress protein	-7.23961
				W1DJX9	Efflux pump membrane transporter	2.74928						W1DH13	Mannose-1-phosphate guanylyltransferase (GDP)	-1.21451
				W1DK16	Uncharacterized protein	4.00802						W1DH45	ABC transporter, periplasmic spermidine putrescine-binding protein PotD (TC 3.A.1.11.1)	-3.04844
				W1DK40	Molybdopterin biosynthesis Mog protein,molybdochelatase	3.2337						W1DH46	Ornithine carbamoyltransferase	-3.42625
				W1DK66	Threonine synthase	1.29943						W1DH48	Probable tonB-dependent receptor yncD	-2.80734
				W1DK89	Argininosuccinate lyase	3.63755						W1DH61	NAD-dependent glyceraldehyde-3-phosphate dehydrogenase	-3.29337
				W1DKA4	Translation elongation factor Tu	1.87998						W1DH94	Oxidoreductase	-4.32957
				W1DKB3	Dihydroxy-acid dehydratase	4.21484						W1DH96	Phosphate acetyltransferase	-2.24594
				W1DKB7	Ketol-acid reductoisomerase	3.58342						W1DHA1	Glutamate dehydrogenase	-5.51772
				W1DKI8	Serine hydroxymethyltransferase	1.18632						W1DHA2	Dihydroneopterin triphosphate epimerase	-3.28744
				W1DKR1	Translational regulator CsrA	5.11241						W1DHA6	Fructose-1,6-bisphosphatase, type I	-5.30029
				W1DKS9	Transcriptional regulator, PadR family	1.02682						W1DHB2	Phosphate ABC transporter, periplasmic phosphate-binding protein PstS (TC 3.A.1.7.1)	-3.71389
				W1DKU9	Putative oxidoreductase	1.59894						W1DHB5	HD-GYP domain	-1.75171
				W1DL10	Tartrate dehydrogenase / Tartrate decarboxylase / D-malic enzyme	4.3823						W1DHB7	N-acetylglucosamine-1-phosphate uridyltransferase / Glucosamine-1-phosphate N-acetyltransferase	-2.73343
				W1DL25	Uncharacterized protein	4.84682						W1DHF2	Glycerol dehydrogenase	-1.25753
				W1DL78	Alcohol dehydrogenase Acetaldehyde dehydrogenase	3.0495						W1DHG6	Fructose repressor FruR, LacI family	-3.14209
				W1DLE5	Uncharacterized protein	1.76224						W1DHG9	Tyrosine--tRNA ligase	-5.8611
				W1DLP5	50S ribosomal protein L7/L12	1.45848						W1DHK7	50S ribosomal protein L31	-2.05628
				W1DLQ0	DNA-directed RNA polymerase beta subunit	1.07986						W1DHL5	Chaperone protein DnaJ	-1.2056
				W1DLR0	Outer membrane protein A	1.10778						W1DHL7	N-acetylglucosamine-1-phosphate uridyltransferase / Glucosamine-1-phosphate N-acetyltransferase	-3.73446
				W1DLU3	Peptidyl-prolyl cis-trans isomerase	3.73128						W1DHM8	3-isopropylmalate dehydrogenase	-1.05872
				W1DLU6	Phosphoglycolate phosphatase	1.30168						W1DHN4	tRNA uridine 5-carboxymethylaminomethyl modification enzyme GidA	-1.35948
				W1DLX0	Glutamate 5-kinase / RNA-binding C-terminal domain PUA	3.14606						W1DHN6	DNA ligase	-2.82025
				W1DLY3	GMP synthase [glutamine-hydrolyzing],amidotransferase subunit / GMP synthase [glutamine-hydrolyzing], ATP pyrophosphatase subunit	1.47669						W1DHP5	RNase adapter protein RapZ	-3.37359
				W1DLY8	50S ribosomal protein L18	4.14623						W1DHP8	Protein GrpE	-6.42435
				W1DLZ3	50S ribosomal protein L14	2.6062						W1DHQ0	Pyruvate oxidase [ubiquinone, cytochrome]	-3.85969
				W1DM00	Chaperone protein ClpB	1.23609						W1DHQ3	Dihydrolipoamide acetyltransferase component of pyruvate dehydrogenase complex	-2.46294
				W1DM05	Ribosome hibernation protein YfiA	3.39656						W1DHQ8	Glutathione S-transferase	-1.08797
				W1DM17	Thiol:disulfide interchange protein	4.28978						W1DHR6	UDP-4-amino-4-deoxy-L-arabinose--oxoglutarate aminotransferase	-4.58695
				W1DM32	Rare lipoprotein A	1.53439						W1DHT4	Endopeptidase La	-3.27003
				W1DM44	Outer membrane protein assembly factor BamA	1.28252						W1DHT9	Putative ATPase component of ABC transporter with duplicated ATPase domain	-4.48518
				W1DM86	S-adenosylmethionine synthetase	3.89124						W1DHV3	Probable phosphatase	-3.21844
				W1DMB9	Bifunctional purine biosynthesis protein PurH	3.39712						W1DHX2	Succinate dehydrogenase iron-sulfur subunit	-4.45985
				W1DMD1	Protein involved in stability of MscS mechanosensitive channel	1.42225						W1DHY1	Uncharacterized protein	-3.07132
				W1DMD2	Phosphoenolpyruvate carboxylase	3.48283						W1DHZ2	Alpha-dextrin endo-1,6-alpha-glucosidase (Pullulanase)	-5.23642
				W1DME6	Acetolactate synthase, catabolic	3.76074						W1DHZ8	Sigma cross-reacting protein 27A	-4.1797
				W1DMG4	YcfF/hinT protein: a purine nucleoside phosphoramidase	2.55927						W1DI34	ATP-dependent protease La Type I	-3.85275
				W1DMM4	UDP-N-acetylmuramate:L-alanyl-gamma-D-glutamyl-meso-diaminopimelate ligase	1.18818						W1DI66	Protein translocase subunit SecD	-6.25108
				W1DMQ6	Glycerol kinase	1.07427						W1DI68	Elongation factor P	-3.16743
				W1DMV8	Dipeptide-binding ABC transporter, periplasmic substrate-binding component (TC 3.A.1.5.2)	1.45338						W1DI75	Galactokinase	-6.55617
				W1DMY3	Methionine ABC transporter substrate-binding protein	1.90352						W1DI98	Outer membrane protein assembly factor BamD	-7.07143
				W1DN30	3-phosphoshikimate 1-carboxyvinyltransferase	2.51796						W1DIB2	Protein RecA	-6.89424
				W1DN47	Aminotransferase	1.33764						W1DIB5	DNA topoisomerase I	-2.57487
				W1DN54	Elongation factor P-like protein	3.64341						W1DIC2	Biosynthetic Aromatic amino acid aminotransferase alpha	-2.1748
				W1DN82	LSU ribosomal protein L28p	1.32787						W1DIC3	Aconitate hydratase	-1.90381
				W1DN93	Glutamate synthase [NADPH] large chain	4.85538						W1DIC5	Type 1 fimbriae anchoring protein FimD	-3.66516
				W1DNC9	Lipoprotein NlpD	1.45949						W1DIE5	Aspartate-semialdehyde dehydrogenase	-1.19525
				W1DNH0	30S ribosomal protein S12	2.79459						W1DIH3	Glucose-6-phosphate 1-dehydrogenase	-3.02264
				W1DNH5	YheO-like PAS domain	3.03821						W1DIH6	Acetate kinase	-1.92291
				W1DNK8	Septum site-determining protein MinD	2.18209						W1DII2	Glycerol-3-phosphate dehydrogenase [NAD(P)+]	-1.01681
				W1DNM5	PTS system, diacetylchitobiose-specific IIA component	2.68437						W1DII4	Succinate dehydrogenase hydrophobic membrane anchor subunit	-1.87348
				W1DNN4	Formate dehydrogenase H @ selenocysteine-containing	2.19538						W1DIJ1	Phospho-2-dehydro-3-deoxyheptonate aldolase	-2.15168
				W1DNP3	Isochorismatase [enterobactin] siderophore / Apo-aryl carrier domain of EntB	2.29695						W1DIJ9	Uncharacterized protein	-4.05341
				W1DNQ6	Aspartate-semialdehyde dehydrogenase	1.30097						W1DIK7	Hydrogen peroxide-inducible genes activator	-3.31676
				W1DNS7	Arginine ABC transporter, periplasmic arginine-binding protein ArtJ	4.57938						W1DIL9	Protein translocase subunit SecE	-3.78412
				W1DNW1	ATP-dependent 6-phosphofructokinase	1.84586						W1DIM3	Probable cytosol aminopeptidase	-3.41446
				W1DNW8	S-adenosylmethionine synthetase	2.72535						W1DIM6	LPS-assembly protein LptD	-2.77042
				W1DNY2	Triosephosphate isomerase	2.72885						W1DIM9	Autoinducer 2 (AI-2) aldolase LsrF	-2.78555
				W1DNY9	50S ribosomal protein L15	1.94199						W1DIN0	Deoxyribose-phosphate aldolase	-1.12178
				W1DNZ4	30S ribosomal protein S8	1.22997						W1DIN3	Proline--tRNA ligase	-1.10244
				W1DP04	Argininosuccinate synthase	4.83136						W1DIN8	Methionine import ATP-binding protein MetN	-1.58971
				W1DP28	Putative sugar ABC transporter	3.64591						W1DIN9	Putative membrane protein	-2.90209
				W1DP39	Argininosuccinate synthase	3.43214						W1DIQ2	Regulator of length of O-antigen component of lipopolysaccharide chains	-1.69792
				W1DP44	PTS system, glucose-specific IIB component / PTS system, glucose-specific IIC component	2.70501						W1DIQ6	UDP-glucose dehydrogenase	-1.19785
				W1DP59	Shikimate kinase 1	4.11936						W1DIR4	Succinate--CoA ligase [ADP-forming] subunit beta	-3.30346
				W1DPA3	Phosphoglycerate kinase	1.72203						W1DIR6	NADH-quinone oxidoreductase subunit F	-2.33535
				W1DPF4	Pyrimidine/purine nucleoside phosphorylase	5.11449						W1DIR9	Cytochrome d ubiquinol oxidase subunit II	-4.57827
				W1DPG1	Phosphoenolpyruvate-protein phosphotransferase of PTS system	3.18432						W1DIT4	PTS system, trehalose-specific IIB component / PTS system, trehalose-specific IIC component	-5.4303
				W1DPG5	Homoserine dehydrogenase	4.18266						W1DIW8	Negative modulator of initiation of replication	-3.0557
				W1DPH9	NAD(P) transhydrogenase subunit alpha	3.9366						W1DIY7	Alpha-1,4 glucan phosphorylase	-1.34802
				W1DPI4	Cold shock protein CspC	5.10049						W1DIZ7	Stringent starvation protein A	-7.32584
				W1DPM3	Phenylalanine--tRNA ligase alpha subunit	2.94651						W1DJ05	Malate dehydrogenase	-4.70856
				W1DPP2	Soluble lytic murein transglycosylase	2.46216						W1DJ17	Fumarate hydratase class I	-6.67496
				W1DPP6	6-phosphogluconate dehydrogenase, decarboxylating	1.8924						W1DJ25	PTS system, N-acetylglucosamine-specific IIA component / PTS system,N-acetylglucosamine-specific IIB component / PTS system, N-acetylglucosamine-specific IIC component	-4.4398
				W1DPQ3	Probable transcriptional regulatory protein	3.25407						W1DJ52	2-Keto-3-deoxy-D-manno-octulosonate-8-phosphate synthase	-4.59078
				W1DPS4	Transketolase, C-terminal section	3.28255						W1DJ65	Uncharacterized acetyltransferase YjgM	-3.50369
				W1DQ14	TonB-dependent receptor Outer membrane receptor for ferric enterobactin and colicins B, D	3.39108						W1DJ81	Glutamine--fructose-6-phosphate aminotransferase [isomerizing]	-5.66831
				W1DQB4	Lipoate-protein ligase A	3.77656						W1DJ87	ATP synthase subunit delta	-3.38329
				W1DQB9	Leucine-responsive regulatory protein, regulator for leucine (Or lrp) regulon and high-affinity branched-chain amino acid transport system	1.83416						W1DJA4	Glycoprotein-polysaccharide metabolism	-6.39443
				W1DQC7	50S ribosomal protein L11	2.4666						W1DJE3	Oligopeptide ABC transporter, periplasmic oligopeptide-binding protein OppA (TC 3.A.1.5.1)	-4.68407
				W1DQH1	Arginine ABC transporter, periplasmic arginine-binding protein ArtI	1.62745						W1DJE4	Ribonucleotide reductase of class III (Anaerobic), large subunit	-1.295
				W1DQJ4	Decarboxylase family protein	1.45412						W1DJF2	GMP synthase (glutamine-hydrolyzing)	-4.13764
				W1DQJ5	ATP-dependent hsl protease ATP-binding subunit HslU	1.11821						W1DJF8	Formyltetrahydrofolate deformylase	-3.58587
				W1DQJ6	Acetylornithine aminotransferase / N-succinyl-L,L-diaminopimelate aminotransferase	3.59522						W1DJI1	Glycine cleavage system transcriptional antiactivator GcvR	-1.47429
				W1DQL0	NAD-dependent glyceraldehyde-3-phosphate dehydrogenase	2.83489						W1DJI6	Glutamate synthase [NADPH] small chain	-1.20695
				W1DQM1	Phage shock protein A	2.49165						W1DJI7	Probable exported protein YPO4070	-1.25157
				W1DQN6	Uroporphyrinogen decarboxylase	2.57053						W1DJJ0	Ribulosamine/erythrulosamine 3-kinase potentially involved in protein deglycation	-1.5559
				W1DQR5	Copper-sensing two-component system response regulator CpxR	1.72814						W1DJJ1	50S ribosomal protein L13	-1.48195
				W1DQS7	DNA gyrase subunit B	2.68741						W1DJJ5	Homolog of E. coli HemX protein	-3.69159
				W1DQW8	D-lactate dehydrogenase	1.67138						W1DJJ6	DNA-directed RNA polymerase subunit omega	-4.03741
				W1DR07	Fructose-bisphosphate aldolase class II	1.0916						W1DJJ8	Periplasmic serine endoprotease DegP-like	-2.35385
				W1DR11	Putative metalloprotease yggG	2.16474						W1DJL7	Isoleucine--tRNA ligase	-3.89859
				W1DR17	Phosphoglucosamine mutase	4.50233						W1DJL8	Transcription-repair coupling factor	-3.88197
				W1DR26	N-acetyl-gamma-glutamyl-phosphate reductase	4.35085						W1DJL9	Translation elongation factor P Lys34:lysine transferase	-4.04587
				W1DR30	Alpha-acetolactate decarboxylase	4.42548						W1DJN2	Lipoprotein	-4.26437
				W1DR34	FIG004454: RNA binding protein	1.17459						W1DJN9	FIG021952: putative membrane protein	-3.29228
				W1DR59	Enolase	2.43915						W1DJP3	NAD(P)H-flavin reductase	-2.86178
				W1DR61	Glycerol dehydrogenase	2.54385						W1DJQ1	30S ribosomal protein S3	-2.19267
				W1DR90	Phosphoenolpyruvate-protein phosphotransferase of PTS system	2.67573						W1DJQ3	Alcohol dehydrogenase	-1.77825
				W1DRA7	TldE protein, part of TldE/TldD proteolytic complex	1.10408						W1DJQ8	Bacterioferritin	-5.90789
				W1DRB1	Phenylalanine--tRNA ligase beta subunit	1.42647						W1DJQ9	Fructose-1,6-bisphosphatase, type I	-2.90537
				W1DRD3	Quinolinate phosphoribosyltransferase [decarboxylating]	1.54552						W1DJR9	6-phosphofructokinase class II	-2.39423
				W1DRD9	Methylenetetrahydrofolate reductase	2.34318						W1DJS1	Cytochrome O ubiquinol oxidase subunit I	-7.14145
				W1DRG2	Phosphotransferase system, phosphocarrier protein HPr	4.97594						W1DJS7	Glutathione S-transferase, omega	-3.26796
				W1DRH0	6-phosphogluconate dehydrogenase, decarboxylating	1.32338						W1DJT0	ATP-dependent Clp protease ATP-binding subunit ClpX	-4.26585
				W1DRL2	PTS system, mannose-specific IIC component	1.62893						W1DJT4	Peptidylprolyl isomerase	-2.56232
				W1DRQ1	Peptidyl-prolyl cis-trans isomerase	2.43848						W1DJT5	2-hydroxy-3-oxopropionate reductase	-5.73206
				W1DRX9	Sulfite reductase [NADPH] hemoprotein beta-component	2.80004						W1DJT7	1,4-dihydroxy-2-naphthoyl-CoA synthase	-3.7469
				W1DRZ3	Pantothenate synthetase	3.29481						W1DJV9	Universal stress protein F	-5.1459
				W1DSD8	Thiol:disulfide interchange protein	2.52338						W1DJW9	Putative phosphosugar isomerase	-6.30552
				W1DSK2	NAD-dependent glyceraldehyde-3-phosphate dehydrogenase	1.52151						W1DK12	Periplasmic protein related to spheroblast formation	-2.34325
				W1DSK3	S-methylmethionine permease	3.80447						W1DK31	Exodeoxyribonuclease III	-2.01277
				W1DSK6	Polysaccharide export lipoprotein Wza	1.1939						W1DK45	Elongation factor G	-1.84992
				W1DSN9	Trehalose-6-phosphate synthase	3.11911						W1DK62	Hypothetical oxidoreductase YqhD	-4.12108
				W1DSQ8	Glucose-6-phosphate isomerase	1.07658						W1DK99	Protein translocase subunit SecY	-1.10578
				W1DSS2	Uncharacterized protein	1.91606						W1DKA1	Aspartate ammonia-lyase	-7.52663
				W1DSU9	Enolase	2.923						W1DKB5	30S ribosomal protein S10	-2.22776
				W1DSV3	SAM-dependent methyltransferase YafE (UbiE paralog)	2.793						W1DKB8	Universal stress protein G	-6.73034
				W1DSW8	LysR family transcriptional regulator YafC	1.6446						W1DKC0	Uncharacterized protein	-2.00778
				W1DT78	Protein ydgH	1.78003						W1DKC9	ATP-dependent RNA helicase SrmB	-1.09431
				W1DTF5	Histidinol-phosphate aminotransferase	3.13643						W1DKG4	Chorismate mutase I / Prephenate dehydratase	-2.40759
				W1DTJ6	30S ribosomal protein S6	2.36536						W1DKH1	3-dehydroquinate synthase	-3.88733
				W1DTR4	Small heat shock protein IbpA	4.24342						W1DKI0	Outer membrane lipoprotein Blc	-2.0726
				W1DU04	Cell division protein FtsZ	1.95397						W1DKK2	Na(+)-translocating NADH-quinone reductase subunit A	-4.75529
				W1DU13	GMP reductase	2.06602						W1DKL7	Xanthine phosphoribosyltransferase	-4.79075
				W1DU16	21 kDa hemolysin	1.12						W1DKM1	Inhibitor of vertebrate lysozyme	-1.84003
				W1DUB3	Peptidase B	1.68197						W1DKM3	Phosphatase NudJ	-4.06165
				W1DUC4	UDP-glucose 6-dehydrogenase	1.6175						W1DKP2	Alanine transaminase ## AlaA	-1.946
				W1DUD5	Signal peptidase I	1.67297						W1DKQ7	Glutamate--cysteine ligase	-4.2496
				W1DUE2	Aldose 1-epimerase family protein YeaD	3.80545						W1DKR8	Arylsulfatase	-5.54252
				W1DUL1	Elongation factor Ts	2.64713						W1DKS8	4-alpha-glucanotransferase (Amylomaltase)	-2.5224
				W1DUL8	Peptide deformylase	1.78158						W1DKV0	Nucleoside-specific channel-forming protein Tsx	-5.89625
				W1DUP3	Ferric hydroxamate outer membrane receptor FhuA	2.13518						W1DKV8	NADH-quinone oxidoreductase subunit C/D	-5.14509
				W1DUQ9	Maltose/maltodextrin ABC transporter, permease protein MalF	3.7248						W1DKX0	3-to-5 exoribonuclease RNase R	-2.95614
				W1DVK4	Putative cation-transporting P-type ATPase	2.38826						W1DKZ6	L-threonine 3-dehydrogenase	-3.49098
				W1DVU8	Putative acetyltransferase	1.44873						W1DL15	Glycogen synthase, ADP-glucose transglucosylase	-2.74469
				W1DVX4	Glucans biosynthesis protein G	2.44437						W1DL27	Peroxidase	-4.23854
				W1DXE3	Uncharacterized protein	2.00287						W1DL35	Succinate--CoA ligase [ADP-forming] subunit alpha	-3.12503
				W1DY12	Phosphomannomutase	2.81487						W1DL55	Fructose-1,6-bisphosphatase, GlpX type	-1.08541
												W1DL66	AMP nucleosidase	-2.61273
												W1DL74	Oligopeptide ABC transporter, periplasmic oligopeptide-binding protein OppA (TC 3.A.1.5.1)	-1.42092
												W1DL75	Uncharacterized protein	-2.60043
												W1DL83	4-hydroxy-3-methylbut-2-en-1-yl diphosphate synthase (flavodoxin)	-5.47926
												W1DL87	Methionine ABC transporter permease protein	-4.31735
												W1DL89	Xaa-Pro dipeptidase	-4.94306
												W1DL95	Respiratory nitrate reductase alpha chain	-2.70214
												W1DLA0	Dihydroorotate dehydrogenase (quinone)	-4.37745
												W1DLA2	Glutamate synthase [NADPH] small chain	-2.79149
												W1DLA5	Dihydrolipoamide succinyltransferase component (E2) of 2-oxoglutarate dehydrogenase complex	-4.18622
												W1DLB3	Tol-Pal system protein TolQ	-4.06782
												W1DLB4	ADP-heptose synthase / D-glycero-beta-D-manno-heptose 7-phosphate kinase	-4.68228
												W1DLB6	Carbamoyl-phosphate synthase small chain	-2.56146
												W1DLB7	Diaminobutyrate--2-oxoglutarate aminotransferase	-3.40934
												W1DLB8	UDP-N-acetylmuramoyl-tripeptide--D-alanyl-D-alanine ligase	-2.52192
												W1DLC1	Trehalose-6-phosphate hydrolase	-3.9911
												W1DLD2	Ribonuclease PH	-2.70356
												W1DLE1	Enoyl-[acyl-carrier-protein] reductase [NADH]	-4.29176
												W1DLE2	Protein YicC	-1.27483
												W1DLE3	30S ribosomal protein S16	-6.07389
												W1DLF3	Phospho-N-acetylmuramoyl-pentapeptide-transferase	-2.48439
												W1DLJ0	ClpXP protease specificity-enhancing factor / Stringent starvation protein B	-1.08837
												W1DLJ4	Phosphoenolpyruvate synthase	-1.96387
												W1DLL3	LSU ribosomal protein L1p (L10Ae)	-4.93594
												W1DLL8	Similarity with glutathionylspermidine synthase, group 1	-2.7063
												W1DLM3	PTS system, cellobiose-specific IIB component	-1.27858
												W1DLM5	Purine-nucleoside phosphorylase	-6.7479
												W1DLM9	Acetyl-coenzyme A synthetase	-1.59815
												W1DLN7	Succinate-semialdehyde dehydrogenase [NAD] Succinate-semialdehyde dehydrogenase [NADP+]	-5.94749
												W1DLP1	Carbon starvation protein A paralog	-4.8496
												W1DLP8	Delta-aminolevulinic acid dehydratase	-2.17628
												W1DLR2	30S ribosomal protein S7	-3.63703
												W1DLR8	COG0523: Putative GTPases (G3E family)	-2.89792
												W1DLT9	Blue copper oxidase CueO	-1.8061
												W1DLU1	Nitrite reductase [NAD(P)H] large subunit	-1.63411
												W1DLV0	Alkyl hydroperoxide reductase protein F	-2.63508
												W1DLV8	OsmC/Ohr family protein	-2.00936
												W1DLW1	L,D-transpeptidase YbiS	-1.77695
												W1DLW9	UDP-3-O-(3-hydroxymyristoyl)glucosamine N-acyltransferase	-1.66935
												W1DLX7	Alcohol dehydrogenase	-5.14281
												W1DLZ8	50S ribosomal protein L22	-1.9628
												W1DM31	Class B acid phosphatase	-1.0693
												W1DM35	Formiminoglutamase	-3.47844
												W1DM48	Homolog of E. coli HemY protein	-2.22715
												W1DM51	Acetyl-coenzyme A carboxyl transferase alpha chain	-1.26374
												W1DM54	Putative stomatin/prohibitin-family membrane protease subunit YbbK	-4.17343
												W1DM58	Phosphoribosylformylglycinamidine synthase,synthetase subunit / Phosphoribosylformylglycinamidine synthase, glutamine amidotransferase subunit	-2.06335
												W1DM64	Aminoacyl-histidine dipeptidase (Peptidase D)	-5.97538
												W1DM70	50S ribosomal protein L16	-5.02303
												W1DM79	Bacterioferritin	-2.04774
												W1DM87	Phosphate acetyltransferase	-1.52831
												W1DM92	Periplasmic protein YqjC	-1.29023
												W1DM95	Xaa-Pro aminopeptidase	-2.44607
												W1DMA1	2,3-bisphosphoglycerate-dependent phosphoglycerate mutase	-4.98189
												W1DMC5	Ribose-5-phosphate isomerase A	-3.96602
												W1DMD7	Autoinducer 2 (AI-2) ABC transport system,periplasmic AI-2 binding protein LsrB	-2.08467
												W1DME7	Peptide methionine sulfoxide reductase MsrA	-1.71686
												W1DMF9	Nicotinamidase family protein YcaC	-5.51386
												W1DMH3	Recombination-associated protein RdgC	-2.40253
												W1DMJ5	NAD synthetase	-2.48023
												W1DMJ6	Ferrochelatase	-3.11009
												W1DMJ8	Dihydrolipoyl dehydrogenase	-1.33611
												W1DMK8	Alanine--tRNA ligase	-7.45495
												W1DMN7	Hypothetical oxidoreductase YqhD	-1.46746
												W1DMP0	TonB-dependent hemin, ferrichrome receptor	-4.0435
												W1DMQ4	GTPase Der	-3.74995
												W1DMQ5	Shikimate kinase 1	-1.72661
												W1DMS8	ATP-dependent Clp protease ATP-binding subunit ClpA	-3.40755
												W1DMU8	Sigma factor RpoE negative regulatory protein RseB	-2.12901
												W1DMW8	Valine--tRNA ligase	-5.89222
												W1DMX1	FMN-dependent NADH-azoreductase	-5.00781
												W1DMY1	Phosphopantetheine adenylyltransferase	-3.16356
												W1DN03	Acylphosphatase	-1.75861
												W1DN04	ATP-dependent helicase HrpA	-2.55004
												W1DN07	Orotate phosphoribosyltransferase	-2.62788
												W1DN10	DNA repair protein RadA	-1.51438
												W1DN20	Diaminobutyrate--2-oxoglutarate aminotransferase	-4.09665
												W1DN36	Glycine dehydrogenase (aminomethyl-transferring)	-4.0088
												W1DN39	Peptidyl-prolyl cis-trans isomerase	-3.41901
												W1DN41	L-Proline/Glycine betaine transporter ProP	-1.9598
												W1DN59	Uncharacterized protein	-1.76795
												W1DN65	3-deoxy-D-manno-octulosonic-acid transferase	-3.73794
												W1DN88	Oxidoreductase	-2.61384
												W1DN89	Sulfite reductase [NADPH] flavoprotein alpha-component	-1.90418
												W1DNA2	Aspartate 1-decarboxylase	-4.70486
												W1DNA3	Phosphopentomutase	-1.74802
												W1DNC4	DNA-directed RNA polymerase subunit	-1.28733
												W1DND2	UDP-N-acetylmuramoylalanyl-D-glutamate--2,6-diaminopimelate ligase	-2.18584
												W1DNE4	Putative exported protein	-1.04145
												W1DNF1	6,7-dimethyl-8-ribityllumazine synthase	-6.27914
												W1DNI0	Putative phosphoenolpyruvate synthase regulatory protein	-3.51674
												W1DNI1	Aldehyde dehydrogenase	-5.3009
												W1DNI7	Serine transporter	-3.18502
												W1DNJ1	Thiamine-monophosphate kinase	-2.45566
												W1DNJ8	Peptidyl-prolyl cis-trans isomerase	-2.81785
												W1DNK1	Deoxyribose-phosphate aldolase	-5.18104
												W1DNK6	Ribulose-phosphate 3-epimerase	-5.10562
												W1DNP7	Uncharacterized protein	-2.00686
												W1DNQ2	GMP synthase [glutamine-hydrolyzing],amidotransferase subunit / GMP synthase [glutamine-hydrolyzing], ATP pyrophosphatase subunit	-4.41765
												W1DNQ9	3-oxoacyl-[acyl-carrier-protein] synthase, KASI	-2.67639
												W1DNR6	Translation elongation factor G	-1.33171
												W1DNR8	Putative oxidoreductase YncB	-6.20384
												W1DNS4	Peptidyl-prolyl cis-trans isomerase	-4.5633
												W1DNS6	Transcriptional regulator, TetR family	-1.43326
												W1DNV4	Tryptophanyl-tRNA synthetase	-3.03443
												W1DNV6	D-alanyl-D-alanine carboxypeptidase	-7.27076
												W1DNW6	ATP-dependent protease subunit HslV	-5.16097
												W1DNX3	(3R)-hydroxymyristoyl-[acyl carrier protein] dehydratase	-4.88787
												W1DNX9	Predicted outer membrane lipoprotein YfeY	-1.76624
												W1DNY7	Acyl-CoA dehydrogenases	-1.43551
												W1DNZ2	Polyribonucleotide nucleotidyltransferase	-2.47095
												W1DNZ3	Endonuclease V	-2.05415
												W1DP13	Chromosome (Plasmid) partitioning protein ParA	-1.32269
												W1DP34	Transcription termination/antitermination protein NusA	-2.51677
												W1DP51	Uncharacterized PLP-dependent aminotransferase YfdZ	-3.27995
												W1DP52	Biosynthetic arginine decarboxylase	-2.04424
												W1DP55	YrbA protein	-1.75735
												W1DP71	Lysine--tRNA ligase	-4.82183
												W1DP73	NH(3)-dependent NAD(+) synthetase	-4.54121
												W1DP79	GTPase Obg	-3.69648
												W1DP87	NADH-ubiquinone oxidoreductase chain G	-2.68139
												W1DP89	Uncharacterized ABC transporter, auxiliary component YrbC	-7.36839
												W1DPA9	UDP-sugar hydrolase 5-nucleotidase	-1.86718
												W1DPB8	NAD(P)H-flavin oxidoreductase	-1.18395
												W1DPC6	Acetylglutamate kinase	-2.84806
												W1DPE9	Methylglyoxal reductase, acetol producing / 2,5-diketo-D-gluconate reductase A	-1.3957
												W1DPF2	Aminomethyltransferase	-6.51864
												W1DPF7	Outer membrane protein YfgL, lipoprotein component of the protein assembly complex (Forms a complex with YaeT, YfiO, and NlpB)	-6.98668
												W1DPF9	Uncharacterized protein	-2.00854
												W1DPG6	Ethanolamine utilization polyhedral-body-like protein EutL	-3.32351
												W1DPH8	Dihydrolipoamide acetyltransferase component of pyruvate dehydrogenase complex	-1.08733
												W1DPI1	Phenylalanyl-tRNA synthetase beta chain	-5.83581
												W1DPI2	Succinate-semialdehyde dehydrogenase [NAD] Succinate-semialdehyde dehydrogenase [NADP+]	-1.63398
												W1DPI3	Universal stress protein E	-5.32895
												W1DPI9	Transcriptional regulator KdgR, KDG operon repressor	-5.87206
												W1DPJ4	ATP-dependent Clp protease ATP-binding subunit ClpA	-3.97348
												W1DPK2	TldE protein, part of TldE/TldD proteolytic complex	-3.20979
												W1DPL7	Protein ydjA	-3.85978
												W1DPM0	Aspartyl-tRNA synthetase	-6.72678
												W1DPM4	Iron-sulfur cluster assembly protein SufD	-2.23336
												W1DPM6	Uracil-DNA glycosylase	-1.02973
												W1DPM7	Threonine--tRNA ligase	-1.72726
												W1DPP5	Right origin-binding protein	-2.31735
												W1DPS7	D-alanyl-D-alanine carboxypeptidase	-6.33617
												W1DPU0	Glycerol-3-phosphate dehydrogenase	-3.3299
												W1DPU4	PTS system, mannose-specific IID component	-2.37572
												W1DPX5	Mannonate dehydratase	-1.34952
												W1DPY5	ABC transporter, ATP-binding protein	-3.65057
												W1DPY9	Probable phosphoglycerate mutase GpmB	-2.63906
												W1DPZ8	Glycine--tRNA ligase alpha subunit	-6.65596
												W1DQ07	Phosphopantothenoylcysteine decarboxylase / Phosphopantothenoylcysteine synthetase	-2.61958
												W1DQ10	1,3-propanediol dehydrogenase	-2.37416
												W1DQ33	UDP-N-acetylmuramoylalanyl-D-glutamate--2,6-diaminopimelate ligase	-4.64634
												W1DQ51	C4-dicarboxylate transport protein	-1.98806
												W1DQ52	Outer membrane protein F	-3.95819
												W1DQ53	Lipoprotein NlpD	-2.5665
												W1DQ61	Transcriptional repressor protein TyrR	-1.50002
												W1DQ75	Transcription antitermination protein NusB	-4.66611
												W1DQ82	Epi-inositol hydrolase	-7.48057
												W1DQ89	Glyceraldehyde-3-phosphate ketol-isomerase	-3.72088
												W1DQ92	Lysine-arginine-ornithine-binding periplasmic protein (TC 3.A.1.3.1)	-2.25126
												W1DQA5	Putative aldo/keto reductase	-3.08894
												W1DQD2	DNA-directed RNA polymerase beta subunit	-5.33158
												W1DQD7	Uncharacterized protein	-1.77493
												W1DQE2	RNA polymerase sigma factor RpoS	-4.76996
												W1DQE3	3-hydroxydecanoyl-[acyl-carrier-protein] dehydratase	-5.16307
												W1DQF5	Putative metal chaperone, involved in Zn homeostasis, GTPase of COG0523 family	-4.73556
												W1DQH0	Fatty acid metabolism regulator protein	-4.32697
												W1DQH4	Translation elongation factor G	-3.33527
												W1DQH9	Septum site-determining protein MinC	-2.11232
												W1DQK4	Sulfate and thiosulfate binding protein CysP	-2.32064
												W1DQK5	Serine protein kinase (PrkA protein), P-loop containing	-4.34506
												W1DQK9	Predicted dye-decolorizing peroxidase (DyP),YfeX-like subgroup	-2.2247
												W1DQN8	MltA-interacting protein MipA	-3.03353
												W1DQQ6	Polyribonucleotide nucleotidyltransferase	-5.61258
												W1DQR2	Translation initiation factor IF-2	-6.87521
												W1DQS2	Periplasmic serine endoprotease DegP-like	-1.18692
												W1DQS5	Methionine aminopeptidase	-2.20144
												W1DQS9	Uridylate kinase	-6.26091
												W1DQU2	5-methylthioadenosine/S-adenosylhomocysteine nucleosidase	-1.21918
												W1DQU9	Protein YigP (COG3165) clustered with ubiquinone biosynthetic genes	-3.63456
												W1DQV1	ATP-dependent zinc metalloprotease FtsH	-4.80002
												W1DQV6	Arginine decarboxylase	-1.34995
												W1DQW1	Arabinose-proton symporter	-5.28935
												W1DQX2	Uridine phosphorylase	-6.03179
												W1DQX3	Arginine--tRNA ligase	-1.33019
												W1DQY7	Polyribonucleotide nucleotidyltransferase	-3.52005
												W1DQZ4	Putative ACR protein	-1.85126
												W1DR02	Chromosome initiation inhibitor	-4.87341
												W1DR16	Ferritin-like protein 2	-4.20787
												W1DR25	N-3-oxohexanoyl-L-homoserine lactone quorum-sensing transcriptional activator @ N-3-oxooctanoyl-L-homoserine lactone quorum-sensing transcriptional activator	-3.24163
												W1DR29	D-cysteine desulfhydrase	-3.96652
												W1DR40	GTP pyrophosphokinase, (P)ppGpp synthetase I / Guanosine-3,5-bis(Diphosphate) 3-pyrophosphohydrolase	-3.46473
												W1DR46	Putative inner membrane protein	-2.45508
												W1DR50	UDP-N-acetylglucosamine 1-carboxyvinyltransferase	-2.57672
												W1DR83	Catalase	-3.28876
												W1DRB3	Two-component system response regulator OmpR	-2.78346
												W1DRB5	Translation initiation factor IF-3	-7.02333
												W1DRB8	PTS system, mannitol-specific IIC component / PTS system, mannitol-specific IIB component / PTS system, mannitol-specific IIA component	-2.46693
												W1DRC7	DcrB protein	-3.26802
												W1DRD8	Aromatic amino acid transport protein AroP	-3.06649
												W1DRE6	Aspartyl-tRNA synthetase	-4.15953
												W1DRF5	AmpE protein	-2.53455
												W1DRH7	Phenylalanyl-tRNA synthetase beta chain	-1.97036
												W1DRI4	PTS system, mannose-specific IIB component	-1.74241
												W1DRI7	Lysyl-tRNA synthetase (Class II)	-6.90536
												W1DRI9	Glucosamine--fructose-6-phosphate aminotransferase [isomerizing]	-2.41056
												W1DRL3	Ribonucleoside-diphosphate reductase subunit beta	-2.80191
												W1DRL4	Aconitate hydratase B	-1.1913
												W1DRL8	Aspartyl-tRNA synthetase	-5.2339
												W1DRT6	5-keto-2-deoxygluconokinase / uncharacterized domain	-5.93066
												W1DRY3	Pyridoxine 5-phosphate synthase	-3.0772
												W1DRY4	Glutamate--tRNA ligase	-1.61956
												W1DRZ1	Methylmalonate-semialdehyde dehydrogenase [inositol]	-5.15499
												W1DRZ2	Putative aldo/keto reductase	-4.11295
												W1DRZ9	Myo-inositol 2-dehydrogenase 1	-4.88279
												W1DS03	Inosose dehydratase	-7.27518
												W1DS25	Thioredoxin reductase	-1.36717
												W1DS27	Uncharacterized protein	-3.63124
												W1DS38	Diguanylate cyclase/phosphodiesterase domain 2 (EAL)	-4.58341
												W1DS39	Iron-sulfur cluster regulator IscR	-3.45261
												W1DSA1	Peptidoglycan-associated protein	-4.24848
												W1DSA7	Osmotically inducible protein C	-1.13469
												W1DSB4	Dipeptidyl carboxypeptidase Dcp	-1.37773
												W1DSB7	SsrA-binding protein	-2.83572
												W1DSB8	ABC transport system, permease component YbhS	-3.82706
												W1DSC3	Serine protein kinase (PrkA protein), P-loop containing	-4.60821
												W1DSE2	Probable GTP-binding protein EngB	-4.6879
												W1DSF5	Possible oxidoreductase	-2.04086
												W1DSG2	Promiscuous sugar phosphatase YidA, haloacid dehalogenase-like phosphatase family	-2.4451
												W1DSH6	5-methylthioadenosine/S-adenosylhomocysteine nucleosidase	-1.58405
												W1DSI1	Formate dehydrogenase O alpha subunit @ selenocysteine-containing	-6.57998
												W1DSI4	30S ribosomal protein S2	-1.21124
												W1DSJ4	Regulator of ribonuclease activity A	-4.26
												W1DSJ5	Succinyl-CoA synthetase, alpha subunit-related enzymes	-2.69391
												W1DSM5	Uncharacterized protein	-3.12836
												W1DSM7	Cation efflux system protein CusC	-4.55531
												W1DSN0	UTP--glucose-1-phosphate uridylyltransferase	-5.20059
												W1DSN1	Ferrichrome-iron receptor	-3.46784
												W1DSN5	Methionine synthase	-2.8907
												W1DSP7	Multimodular transpeptidase-transglycosylase	-3.76879
												W1DSQ1	Maltodextrin-binding protein	-7.29268
												W1DSQ2	Ferritin	-4.35592
												W1DSS1	Maltose/maltodextrin import ATP-binding protein MalK	-6.62832
												W1DSS9	Glucose-1-phosphate adenylyltransferase	-3.58521
												W1DST0	FIG000325: clustered with transcription termination protein NusA	-4.86287
												W1DST5	Uncharacterized protein	-2.46714
												W1DSU3	Ubiquinone/menaquinone biosynthesis C-methyltransferase UbiE	-1.43046
												W1DSV0	Glucose-1-phosphate adenylyltransferase	-2.16208
												W1DSW9	Nucleoside diphosphate kinase	-3.93403
												W1DSY1	UDP-N-acetylglucosamine 1-carboxyvinyltransferase	-4.33782
												W1DSY5	6-phospho-beta-glucosidase	-1.22738
												W1DSZ4	Arsenate reductase	-1.65243
												W1DT03	Uncharacterized protein	-2.02264
												W1DT07	Exopolyphosphatase	-4.66123
												W1DT56	Osmoprotectant ABC transporter binding protein YehZ	-2.40307
												W1DT72	Multimodular transpeptidase-transglycosylase	-2.5038
												W1DT79	Lysyl-tRNA synthetase (Class II)	-5.64947
												W1DT82	Phosphoenolpyruvate carboxykinase (ATP)	-6.44303
												W1DT87	Fumarate and nitrate reduction regulatory protein	-1.74609
												W1DT92	Glycine dehydrogenase [decarboxylating] (Glycine cleavage system P protein)	-7.41958
												W1DTA0	Pyruvate kinase	-1.61523
												W1DTA2	PTS system, N-acetylglucosamine-specific IIA component / PTS system,N-acetylglucosamine-specific IIB component / PTS system, N-acetylglucosamine-specific IIC component	-3.11595
												W1DTB3	N-acetylglucosamine-6-phosphate deacetylase	-3.15156
												W1DTB8	Integration host factor subunit alpha	-4.08614
												W1DTC7	Threonine--tRNA ligase	-3.63658
												W1DTD3	Dihydrolipoamide acetyltransferase component of pyruvate dehydrogenase complex	-3.89542
												W1DTE0	Methylenetetrahydrofolate dehydrogenase (NADP+) / Methenyltetrahydrofolate cyclohydrolase	-1.92096
												W1DTI0	Glucosamine--fructose-6-phosphate aminotransferase [isomerizing]	-1.10766
												W1DTJ5	Carbonic anhydrase	-5.43581
												W1DTL1	Uncharacterized membrane lipoprotein clustered with tellurite resistance proteins TehA/TehB	-3.583
												W1DTL4	Spermidine synthase	-4.42944
												W1DTM0	Protein HflK	-3.95044
												W1DTR6	Riboflavin synthase eubacterial/eukaryotic	-1.73581
												W1DTT0	Oxidoreductase	-4.06252
												W1DTV4	tRNA-modifying protein YgfZ	-1.30715
												W1DTY7	Outer membrane protein NlpB, lipoprotein component of the protein assembly complex (Forms a complex with YaeT, YfiO, and YfgL) Lipoprotein-34	-2.25026
												W1DTZ9	Glycerol-3-phosphate acyltransferase	-1.24285
												W1DU22	Glucans biosynthesis protein G	-3.1299
												W1DU29	Signal recognition particle receptor FtsY	-3.8882
												W1DU33	COG1399 protein, clustered with ribosomal protein L32p	-1.70491
												W1DUA5	Outer membrane protein A	-4.89021
												W1DUB1	Ribonucleotide reductase of class Ia (Aerobic),alpha subunit	-5.2661
												W1DUC0	Tyrosine-protein kinase Wzc	-3.93286
												W1DUC5	Uncharacterized protein	-4.38315
												W1DUC7	UTP--glucose-1-phosphate uridylyltransferase	-4.63592
												W1DUE4	Multimodular transpeptidase-transglycosylase	-2.31079
												W1DUG1	Probable haloacid dehalogenase-like hydrolase STY3852	-1.99964
												W1DUH1	Phosphoribosylformylglycinamidine synthase,synthetase subunit / Phosphoribosylformylglycinamidine synthase, glutamine amidotransferase subunit	-1.9606
												W1DUH4	Glutamate transport ATP-binding protein	-2.31469
												W1DUH6	Formate dehydrogenase O alpha subunit @ selenocysteine-containing	-1.0963
												W1DUJ7	Glucose-1-phosphate adenylyltransferase	-4.04263
												W1DUJ8	Iron-sulfur cluster insertion protein ErpA	-1.26898
												W1DUK0	Curved DNA-binding protein	-1.15269
												W1DUN4	Glutamine ABC transporter, periplasmic glutamine-binding protein (TC 3.A.1.3.2)	-3.57421
												W1DUQ2	Cytoplasmic copper homeostasis protein CutC	-2.8522
												W1DUR3	Maltoporin (Maltose/maltodextrin high-affinity receptor, phage lambda receptor protein)	-6.64311
												W1DUS3	UvrABC system protein C	-1.1389
												W1DUV2	Alkanesulfonate utilization operon LysR-family regulator CbI	-1.37587
												W1DUX7	Iron-sulfur cluster carrier protein	-3.88229
												W1DV09	Polyphosphate kinase	-4.63164
												W1DV12	Phosphoenolpyruvate carboxykinase [ATP]	-2.2765
												W1DV39	Uronate isomerase	-3.65967
												W1DV95	Asparagine synthetase [glutamine-hydrolyzing]	-2.46867
												W1DVC7	Putative formate dehydrogenase oxidoreductase protein	-1.55964
												W1DVG6	Ribosomal RNA large subunit methyltransferase M	-1.99874
												W1DVJ7	Amidophosphoribosyltransferase	-2.41369
												W1DVJ8	DNA-binding protein	-3.46538
												W1DVN8	Phosphoribosylaminoimidazole-succinocarboxamide synthase	-1.59825
												W1DVV0	Acid phosphatase	-6.31517
												W1DVY3	Thioredoxin/glutathione peroxidase BtuE	-1.88313
												W1DW17	FIG002208: Acetyltransferase	-2.03083
												W1DW23	Glycosyltransferase	-2.84192
												W1DW28	dTDP-glucose 4,6-dehydratase	-5.30758
												W1DW82	Protein FdhE homolog	-2.4517
												W1DW86	Formate dehydrogenase O alpha subunit @ selenocysteine-containing	-4.67037
												W1DWB5	Ribonuclease 3	-3.50634
												W1DWC3	Low molecular weight protein-tyrosine-phosphatase Wzb	-4.90509
												W1DWC4	LPS-assembly lipoprotein LptE	-2.98221
												W1DX06	Glucosamine-6-phosphate deaminase	-6.68109
												W1DXA8	Uncharacterized protein	-4.01473
												W1DXF4	FolM Alternative dihydrofolate reductase 1	-3.5612
												W1DXM9	5-keto-2-deoxygluconokinase / uncharacterized domain	-5.52465
												W1DXT9	Protein translocase subunit SecA	-7.23812
												W1DY24	Elongation factor 4	-3.77595
												W1DY37	Leucyl-tRNA synthetase	-5.52973
												W1DYC5	Methionyl-tRNA formyltransferase	-3.11924

## Sheet: A1B1
Protein	Protein.name	log2(A1/B1)		Protein	Protein.name	log2(A1/B1)		Protein	Protein.name	log2(A1/B1)		Protein	Protein.name	log2(A1/B1)
W1DDM1	D-alanine--D-alanine ligase	8.17363		W1DCH6	Isocitrate lyase	3.92484		W1DFN9	2-isopropylmalate synthase	-4.28685		W1DCW5	Serine--tRNA ligase	-1.48873
W1DDW9	Outer-membrane lipoprotein carrier protein	6.19553		W1DCK7	Anaerobic dimethyl sulfoxide reductase chain A	1.55215		W1DFP3	Transcriptional regulator MraZ	-4.54756		W1DE29	DNA topoisomerase I	-1.83553
W1DE99	Succinate dehydrogenase flavoprotein subunit	6.37462		W1DCM4	Putative cold-shock protein	1.88225		W1DFV4	Hypothetical lipoprotein YajG	-4.07369		W1DEZ6	Malate synthase	-3.75038
W1DF57	Putrescine ABC transporter putrescine-binding protein PotF (TC 3.A.1.11.2)	7.0627		W1DCZ9	Two-component system response regulator OmpR	3.65761		W1DH01	GTP cyclohydrolase 1	-4.08762		W1DF42	tRNA uridine 5-carboxymethylaminomethyl modification enzyme MnmG	-1.22686
W1DFC2	Acetolactate synthase	7.47322		W1DD01	Lactoylglutathione lyase	1.44055		W1DIC0	Cys regulon transcriptional activator CysB	-3.98505		W1DF95	ThiJ/PfpI family protein	-1.53278
W1DGL4	Ferrous iron transport protein B	6.29758		W1DD55	Uncharacterized protein	1.10263		W1DIL4	Flavohemoprotein (Hemoglobin-like protein) (Flavohemoglobin) (Nitric oxide dioxygenase)	-5.48917		W1DF96	Outer membrane lipoprotein pcp	-1.19466
W1DH46	Ornithine carbamoyltransferase	6.61764		W1DDC3	3-dehydroquinate dehydratase	1.28505		W1DIN2	Ribosomal RNA large subunit methyltransferase J	-4.86947		W1DFB6	RNA chaperone ProQ	-2.47136
W1DHG9	Tyrosine--tRNA ligase	7.9529		W1DDF2	GTPase HflX	2.43197		W1DJG7	Glutathione S-transferase	-4.54214		W1DFE6	ATP synthase subunit alpha	-1.06221
W1DHK7	50S ribosomal protein L31	6.02368		W1DDF7	Glutathionylspermidine synthase / Glutathionylspermidine amidohydrolase	1.24749		W1DJH6	Transcriptional regulator SlyA	-5.12688		W1DFR5	Glutamine ABC transporter, periplasmic glutamine-binding protein (TC 3.A.1.3.2)	-1.11746
W1DHU5	Thiol peroxidase, Bcp-type	6.60071		W1DDQ9	Putative sugar ABC transport system, periplasmic binding protein YtfQ	1.14535		W1DKA8	30S ribosomal protein S17	-6.17386		W1DFX9	60 kDa chaperonin	-1.13452
W1DIZ7	Stringent starvation protein A	7.37687		W1DDU4	Phosphate starvation-inducible ATPase PhoH with RNA binding motif	5.5923		W1DKR1	Translational regulator CsrA	-6.02846		W1DG42	Thioredoxin	-1.92423
W1DJ25	PTS system, N-acetylglucosamine-specific IIA component / PTS system,N-acetylglucosamine-specific IIB component / PTS system, N-acetylglucosamine-specific IIC component	6.49047		W1DDU8	Lysine-specific permease	2.66512		W1DL10	Tartrate dehydrogenase / Tartrate decarboxylase / D-malic enzyme	-4.36063		W1DG48	1-phosphofructokinase	-1.89559
W1DJ96	Enolase-phosphatase E1	7.41965		W1DE38	GTP cyclohydrolase II	2.64016		W1DL25	Uncharacterized protein	-6.38955		W1DG49	Ethanolamine utilization protein EutQ	-1.206
W1DJE2	Efflux pump membrane transporter	6.53947		W1DEE8	DNA topoisomerase 4 subunit A	4.26659		W1DLG0	DNA-binding protein H-NS	-4.98643		W1DGB0	Protein yifE	-1.74953
W1DJJ8	Periplasmic serine endoprotease DegP-like	5.89748		W1DEH2	Aconitate hydratase	1.36031		W1DLU3	Peptidyl-prolyl cis-trans isomerase	-4.8669		W1DGB5	Branched-chain-amino-acid aminotransferase	-1.25715
W1DJP6	50S ribosomal protein L24	9.12113		W1DEJ4	Ribosome-binding ATPase YchF	1.38798		W1DLU6	Phosphoglycolate phosphatase	-4.26777		W1DGC2	Ketol-acid reductoisomerase	-1.05425
W1DLJ0	ClpXP protease specificity-enhancing factor / Stringent starvation protein B	5.87071		W1DEK0	Pseudouridine synthase	4.87476		W1DLY3	GMP synthase [glutamine-hydrolyzing],amidotransferase subunit / GMP synthase [glutamine-hydrolyzing], ATP pyrophosphatase subunit	-5.12133		W1DGE1	Phosphoenolpyruvate carboxykinase (ATP)	-2.19697
W1DMP0	TonB-dependent hemin, ferrichrome receptor	5.65703		W1DEN3	2-oxoglutarate dehydrogenase E1 component	1.22291		W1DM82	Chromosome (Plasmid) partitioning protein ParB	-4.23298		W1DGH4	Glutaminyl-tRNA synthetase	-1.96968
W1DN03	Acylphosphatase	6.21538		W1DEQ9	Formate efflux transporter (TC 2.A.44 family)	1.9237		W1DN82	LSU ribosomal protein L28p	-4.85494		W1DGT4	Pyruvate formate-lyase	-1.22384
W1DN89	Sulfite reductase [NADPH] flavoprotein alpha-component	5.98323		W1DEU9	Iron(III) dicitrate transport protein FecA	1.74516		W1DNM5	PTS system, diacetylchitobiose-specific IIA component	-4.67034		W1DGY8	Cob(I)alamin adenosyltransferase	-1.24559
W1DNF1	6,7-dimethyl-8-ribityllumazine synthase	7.53641		W1DEX1	Ribose ABC transport system, periplasmic ribose-binding protein RbsB (TC 3.A.1.2.1)	4.82943		W1DNX5	Sulfate and thiosulfate binding protein CysP	-6.03529		W1DGY9	RNA polymerase sigma factor RpoD	-1.62099
W1DNP7	Uncharacterized protein	11.5059		W1DF25	Anaerobic dimethyl sulfoxide reductase chain A	3.04924		W1DNZ9	Ribosome-binding factor A	-4.84806		W1DHG4	Histidine--tRNA ligase	-1.15396
W1DP73	NH(3)-dependent NAD(+) synthetase	5.63242		W1DF36	ATP synthase subunit c	1.11752		W1DP59	Shikimate kinase 1	-4.19733		W1DHH6	Enoyl-CoA hydratase / Delta(3)-cis-delta(2)-trans-enoyl-CoA isomerase / 3-hydroxyacyl-CoA dehydrogenase / 3-hydroxybutyryl-CoA epimerase	-1.83272
W1DPE3	NAD(P) transhydrogenase subunit beta	6.14406		W1DF59	Endoribonuclease L-PSP	1.51433		W1DPW4	Phosphoadenosine phosphosulfate reductase	-7.32639		W1DHQ6	Maltoporin (Maltose/maltodextrin high-affinity receptor, phage lambda receptor protein)	-1.18977
W1DPI9	Transcriptional regulator KdgR, KDG operon repressor	7.1848		W1DF62	FIG004016: Uncharacterized protein YggN	1.09186		W1DQB4	Lipoate-protein ligase A	-4.11926		W1DHT2	Phospho-2-dehydro-3-deoxyheptonate aldolase	-1.51695
W1DPS7	D-alanyl-D-alanine carboxypeptidase	6.83265		W1DFB5	tRNA modification GTPase MnmE	1.25134		W1DR17	Phosphoglucosamine mutase	-5.27994		W1DHV4	Heat shock protein 60 family chaperone GroEL	-1.95846
W1DQ52	Outer membrane protein F	5.69573		W1DFG4	PTS IIA-like nitrogen-regulatory protein PtsN	1.30981		W1DR61	Glycerol dehydrogenase	-4.17592		W1DI41	Alkyl hydroperoxide reductase protein C	-1.16101
W1DQC3	UPF0482 protein	6.81698		W1DFG7	N-ethylmaleimide reductase	1.01288		W1DRD9	Methylenetetrahydrofolate reductase	-3.92181		W1DI91	Oxygen-insensitive NAD(P)H nitroreductase / Dihydropteridine reductase	-1.25856
W1DQE3	3-hydroxydecanoyl-[acyl-carrier-protein] dehydratase	5.90541		W1DFJ8	Pyridoxine/pyridoxamine 5-phosphate oxidase	3.73312		W1DSD8	Thiol:disulfide interchange protein	-4.64222		W1DIA3	Oligopeptidase A	-1.15843
W1DQH9	Septum site-determining protein MinC	5.70739		W1DFK8	Inorganic pyrophosphatase	1.06287		W1DSK6	Polysaccharide export lipoprotein Wza	-5.48134		W1DIA8	Uncharacterized protein	-1.50984
W1DQR2	Translation initiation factor IF-2	6.77213		W1DFQ9	Alkaline phosphatase	1.91746		W1DSW3	Phosphoheptose isomerase	-6.09071		W1DID5	2-hydroxy-3-oxopropionate reductase	-3.22478
W1DRD8	Aromatic amino acid transport protein AroP	6.0444		W1DFR9	Lipopolysaccharide ABC transporter, ATP-binding protein LptB	2.65627		W1DTR4	Small heat shock protein IbpA	-4.85643		W1DID6	Glycerol-3-phosphate dehydrogenase	-1.45909
W1DSH6	5-methylthioadenosine/S-adenosylhomocysteine nucleosidase	6.62071		W1DFW8	Exoribonuclease 2	5.51232		W1DUB3	Peptidase B	-7.09437		W1DIF0	Glycerophosphoryl diester phosphodiesterase,periplasmic	-1.20902
W1DSJ4	Regulator of ribonuclease activity A	8.17245		W1DG18	Transcription termination/antitermination protein NusG	1.6234		W1DUP3	Ferric hydroxamate outer membrane receptor FhuA	-4.89948		W1DIF1	Aminoacyl-histidine dipeptidase (Peptidase D)	-1.26776
W1DSM7	Cation efflux system protein CusC	6.3039		W1DG25	L-threonine dehydratase	1.14753		W1DVG5	Oxidoreductase, aldo/keto reductase family	-3.98626		W1DIF3	Transcription termination factor Rho	-1.57397
W1DSN0	UTP--glucose-1-phosphate uridylyltransferase	5.8766		W1DG54	Transaldolase	5.07209		W1DWH1	Maltoporin (Maltose/maltodextrin high-affinity receptor, phage lambda receptor protein)	-6.20656		W1DII4	Succinate dehydrogenase hydrophobic membrane anchor subunit	-1.68236
W1DSN5	Methionine synthase	5.88877		W1DG60	FIG136845: Rhodanese-related sulfurtransferase	2.41922						W1DIM5	Acetolactate synthase large subunit	-3.87964
W1DSY1	UDP-N-acetylglucosamine 1-carboxyvinyltransferase	5.93014		W1DG72	Aerobic respiration control protein arcA	2.00706						W1DIN6	Phosphoglucomutase	-1.7621
W1DTC7	Threonine--tRNA ligase	5.75984		W1DG75	Homoserine kinase	3.38456						W1DIR9	Cytochrome d ubiquinol oxidase subunit II	-1.40903
W1DUW3	CTP synthase	6.5423		W1DG85	Polymyxin resistance protein ArnA_DH,UDP-glucuronic acid decarboxylase / Polymyxin resistance protein ArnA_FT, UDP-4-amino-4-deoxy-L-arabinose formylase	2.20972						W1DIT2	Branched-chain amino acid ABC transporter, amino acid-binding protein (TC 3.A.1.4.1)	-1.72002
W1DV09	Polyphosphate kinase	7.02064		W1DG97	Outer membrane protein Imp, required for envelope biogenesis / Organic solvent tolerance protein	1.49326						W1DIV1	Alanyl-tRNA synthetase	-1.31089
W1DVC7	Putative formate dehydrogenase oxidoreductase protein	5.77694		W1DGB9	DNA topoisomerase I	1.32929						W1DIV4	YciL protein	-1.01879
W1DVN8	Phosphoribosylaminoimidazole-succinocarboxamide synthase	5.89241		W1DGC0	PTS system, fructose-specific IIB component / PTS system, fructose-specific IIC component	3.61227						W1DIW8	Negative modulator of initiation of replication	-1.30497
W1DVN9	Dipeptide-binding ABC transporter, periplasmic substrate-binding component (TC 3.A.1.5.2)	5.89471		W1DGD0	50S ribosomal protein L3 glutamine methyltransferase	1.77532						W1DIZ3	Glutamate synthase [NADPH] small chain	-1.58102
W1DW60	Glucans biosynthesis protein G	7.55381		W1DGD3	Protein-export protein SecB	1.35232						W1DJ52	2-Keto-3-deoxy-D-manno-octulosonate-8-phosphate synthase	-1.04986
				W1DGD8	Transcription termination factor Rho	1.5012						W1DJ62	Biotin carboxyl carrier protein of acetyl-CoA carboxylase	-1.3641
				W1DGF7	Gamma-aminobutyrate:alpha-ketoglutarate aminotransferase	2.9906						W1DJB3	3-to-5 exoribonuclease RNase R	-1.3508
				W1DGJ1	Ribosomal RNA small subunit methyltransferase A	2.05629						W1DJE8	Thymidine kinase	-1.04478
				W1DGJ4	Succinate dehydrogenase iron-sulfur subunit	1.72293						W1DJG2	Ion-translocating oxidoreductase complex subunit G	-2.57698
				W1DGJ6	DNA topoisomerase I	3.44507						W1DJJ9	4-hydroxy-tetrahydrodipicolinate reductase	-1.90237
				W1DGK3	Aconitate hydratase	1.15133						W1DJU8	Fe/S biogenesis protein NfuA	-1.16287
				W1DGK4	Phosphoglucomutase	1.12111						W1DJW6	Glucokinase	-1.10979
				W1DGK6	Chorismate synthase	1.65946						W1DK11	Chaperone FimC	-1.6305
				W1DGL2	Pseudouridine synthase	2.28827						W1DK40	Molybdopterin biosynthesis Mog protein,molybdochelatase	-3.23111
				W1DGR1	Paraquat-inducible protein B	2.68571						W1DKS9	Transcriptional regulator, PadR family	-1.65491
				W1DGR8	Pyrrolidone-carboxylate peptidase	4.53793						W1DKZ0	Pyruvate formate-lyase	-1.69143
				W1DGS0	Sulfate adenylyltransferase	5.07364						W1DL89	Xaa-Pro dipeptidase	-2.65586
				W1DGS4	Glutamine--tRNA ligase	3.47519						W1DLA7	30S ribosomal protein S9	-1.13721
				W1DGS7	Outer Membrane Siderophore Receptor IroN	1.64777						W1DLA9	Cytochrome d ubiquinol oxidase subunit I	-2.05413
				W1DGT1	Ferric uptake regulation protein	1.47129						W1DLB7	Diaminobutyrate--2-oxoglutarate aminotransferase	-1.84725
				W1DGT2	Ribose ABC transport system, periplasmic ribose-binding protein RbsB (TC 3.A.1.2.1)	4.26098						W1DLP1	Carbon starvation protein A paralog	-1.52592
				W1DGU6	1,2-dihydroxy-3-keto-5-methylthiopentene dioxygenase	2.81909						W1DLR0	Outer membrane protein A	-1.1101
				W1DGW6	tRNA sulfurtransferase	2.79489						W1DLZ3	50S ribosomal protein L14	-1.21033
				W1DGY1	Peptide transport periplasmic protein SapA	3.46692						W1DM11	Putative cytoplasmic protein	-1.14231
				W1DH29	Biotin carboxylase	1.09442						W1DM17	Thiol:disulfide interchange protein	-1.14461
				W1DH45	ABC transporter, periplasmic spermidine putrescine-binding protein PotD (TC 3.A.1.11.1)	5.03896						W1DM47	Acyl-[acyl-carrier-protein]--UDP-N-acetylglucosamine O-acyltransferase	-2.38382
				W1DH48	Probable tonB-dependent receptor yncD	4.70804						W1DM60	50S ribosomal protein L30	-1.04034
				W1DH61	NAD-dependent glyceraldehyde-3-phosphate dehydrogenase	1.34486						W1DM65	50S ribosomal protein L5	-1.27157
				W1DH94	Oxidoreductase	1.613						W1DM70	50S ribosomal protein L16	-1.99589
				W1DHA1	Glutamate dehydrogenase	1.42933						W1DM79	Bacterioferritin	-3.33574
				W1DHA2	Dihydroneopterin triphosphate epimerase	1.34524						W1DMA2	D-3-phosphoglycerate dehydrogenase	-1.13625
				W1DHB2	Phosphate ABC transporter, periplasmic phosphate-binding protein PstS (TC 3.A.1.7.1)	4.35627						W1DMB0	CDP-diacylglycerol--serine O-phosphatidyltransferase	-1.4196
				W1DHB7	N-acetylglucosamine-1-phosphate uridyltransferase / Glucosamine-1-phosphate N-acetyltransferase	1.57148						W1DMM3	Pyruvate formate-lyase	-2.34458
				W1DHF2	Glycerol dehydrogenase	3.22882						W1DMM4	UDP-N-acetylmuramate:L-alanyl-gamma-D-glutamyl-meso-diaminopimelate ligase	-1.01874
				W1DHG6	Fructose repressor FruR, LacI family	1.77871						W1DMV8	Dipeptide-binding ABC transporter, periplasmic substrate-binding component (TC 3.A.1.5.2)	-1.29468
				W1DHH1	3-polyprenyl-4-hydroxybenzoate carboxy-lyase	4.90022						W1DN07	Orotate phosphoribosyltransferase	-3.13032
				W1DHL5	Chaperone protein DnaJ	1.02631						W1DN14	Trp operon repressor	-1.137
				W1DHL7	N-acetylglucosamine-1-phosphate uridyltransferase / Glucosamine-1-phosphate N-acetyltransferase	1.8557						W1DN20	Diaminobutyrate--2-oxoglutarate aminotransferase	-1.32625
				W1DHM8	3-isopropylmalate dehydrogenase	1.66306						W1DN54	Elongation factor P-like protein	-1.17457
				W1DHN4	tRNA uridine 5-carboxymethylaminomethyl modification enzyme GidA	1.40367						W1DNC9	Lipoprotein NlpD	-2.36057
				W1DHN6	DNA ligase	5.12938						W1DNN4	Formate dehydrogenase H @ selenocysteine-containing	-1.13316
				W1DHP8	Protein GrpE	1.70055						W1DNS7	Arginine ABC transporter, periplasmic arginine-binding protein ArtJ	-1.56763
				W1DHR6	UDP-4-amino-4-deoxy-L-arabinose--oxoglutarate aminotransferase	2.56531						W1DNW7	IncW plasmid conjugative relaxase protein TrwC (TraI homolog)	-1.88295
				W1DHT9	Putative ATPase component of ABC transporter with duplicated ATPase domain	3.20422						W1DP98	Uncharacterized protein	-1.13049
				W1DHV3	Probable phosphatase	3.38451						W1DPA3	Phosphoglycerate kinase	-1.02737
				W1DHX2	Succinate dehydrogenase iron-sulfur subunit	1.09061						W1DPG1	Phosphoenolpyruvate-protein phosphotransferase of PTS system	-1.09143
				W1DHZ2	Alpha-dextrin endo-1,6-alpha-glucosidase (Pullulanase)	1.40137						W1DPG5	Homoserine dehydrogenase	-3.61559
				W1DHZ8	Sigma cross-reacting protein 27A	5.06771						W1DPH2	Short chain dehydrogenase	-1.01017
				W1DI31	Acetyl-coenzyme A carboxylase carboxyl transferase subunit beta	1.77415						W1DPH9	NAD(P) transhydrogenase subunit alpha	-1.40238
				W1DI34	ATP-dependent protease La Type I	1.68219						W1DPM3	Phenylalanine--tRNA ligase alpha subunit	-1.08459
				W1DI50	NADP-dependent malic enzyme	1.51369						W1DPP2	Soluble lytic murein transglycosylase	-2.31181
				W1DI66	Protein translocase subunit SecD	5.62389						W1DPQ3	Probable transcriptional regulatory protein	-2.57253
				W1DI68	Elongation factor P	4.32913						W1DQH1	Arginine ABC transporter, periplasmic arginine-binding protein ArtI	-2.75547
				W1DI75	Galactokinase	1.20768						W1DQN6	Uroporphyrinogen decarboxylase	-3.52305
				W1DI98	Outer membrane protein assembly factor BamD	2.25489						W1DQS7	DNA gyrase subunit B	-1.09008
				W1DIA2	S-ribosylhomocysteine lyase	1.40548						W1DQU5	Putative carboxymethylenebutenolidase	-2.33187
				W1DIA6	Outer-membrane lipoprotein LolB	1.58182						W1DQU6	Chromosome segregation ATPase	-1.327
				W1DIB2	Protein RecA	5.62391						W1DQW7	Cof protein, HD superfamily hydrolase	-2.17819
				W1DIC2	Biosynthetic Aromatic amino acid aminotransferase alpha	3.85668						W1DR07	Fructose-bisphosphate aldolase class II	-1.31403
				W1DIC3	Aconitate hydratase	1.69965						W1DR11	Putative metalloprotease yggG	-2.13057
				W1DIH3	Glucose-6-phosphate 1-dehydrogenase	1.87338						W1DR26	N-acetyl-gamma-glutamyl-phosphate reductase	-1.71468
				W1DII2	Glycerol-3-phosphate dehydrogenase [NAD(P)+]	1.26489						W1DR72	Osmotically inducible lipoprotein E	-1.36897
				W1DIJ1	Phospho-2-dehydro-3-deoxyheptonate aldolase	2.45506						W1DR90	Phosphoenolpyruvate-protein phosphotransferase of PTS system	-2.09365
				W1DIJ9	Uncharacterized protein	1.68766						W1DRI9	Glucosamine--fructose-6-phosphate aminotransferase [isomerizing]	-3.40284
				W1DIL9	Protein translocase subunit SecE	1.44999						W1DRQ1	Peptidyl-prolyl cis-trans isomerase	-2.27272
				W1DIM3	Probable cytosol aminopeptidase	2.09942						W1DRT0	Mlc, transcriptional repressor of MalT (The transcriptional activator of maltose regulon) and manXYZ operon	-1.71061
				W1DIM6	LPS-assembly protein LptD	3.06839						W1DS27	Uncharacterized protein	-2.32711
				W1DIN8	Methionine import ATP-binding protein MetN	4.6978						W1DSI4	30S ribosomal protein S2	-1.10484
				W1DIN9	Putative membrane protein	1.91154						W1DSK3	S-methylmethionine permease	-3.55973
				W1DIT4	PTS system, trehalose-specific IIB component / PTS system, trehalose-specific IIC component	2.92993						W1DSM5	Uncharacterized protein	-1.38015
				W1DIX8	Alpha-1,4 glucan phosphorylase	3.32321						W1DSN9	Trehalose-6-phosphate synthase	-1.16353
				W1DIY7	Alpha-1,4 glucan phosphorylase	5.01466						W1DSS2	Uncharacterized protein	-1.09767
				W1DJ43	Galactose operon repressor, GalR-LacI family of transcriptional regulators	1.27804						W1DST8	Outer membrane protein F	-1.1893
				W1DJ47	Protein HflC	2.7577						W1DSV0	Glucose-1-phosphate adenylyltransferase	-1.18537
				W1DJ61	2-amino-3-ketobutyrate coenzyme A ligase	1.61157						W1DSV3	SAM-dependent methyltransferase YafE (UbiE paralog)	-1.24585
				W1DJ87	ATP synthase subunit delta	4.48752						W1DSW8	LysR family transcriptional regulator YafC	-1.36684
				W1DJF2	GMP synthase (glutamine-hydrolyzing)	4.71779						W1DTA0	Pyruvate kinase	-1.03208
				W1DJF8	Formyltetrahydrofolate deformylase	1.84088						W1DTD3	Dihydrolipoamide acetyltransferase component of pyruvate dehydrogenase complex	-1.1989
				W1DJI6	Glutamate synthase [NADPH] small chain	4.98551						W1DTE0	Methylenetetrahydrofolate dehydrogenase (NADP+) / Methenyltetrahydrofolate cyclohydrolase	-1.27482
				W1DJJ5	Homolog of E. coli HemX protein	5.32977						W1DTM5	Cysteine--tRNA ligase	-1.65225
				W1DJJ6	DNA-directed RNA polymerase subunit omega	4.72294						W1DU62	Cell division protein ZapD	-1.55984
				W1DJL9	Translation elongation factor P Lys34:lysine transferase	1.83286						W1DU80	Formate dehydrogenase O beta subunit	-1.28284
				W1DJN2	Lipoprotein	2.14064						W1DUG5	Ribonucleotide reductase of class Ia (Aerobic),beta subunit	-1.4502
				W1DJN9	FIG021952: putative membrane protein	1.6287						W1DUK6	2,3,4,5-tetrahydropyridine-2,6-dicarboxylate N-succinyltransferase	-1.32171
				W1DJP3	NAD(P)H-flavin reductase	2.93119						W1DUL1	Elongation factor Ts	-1.22337
				W1DJQ9	Fructose-1,6-bisphosphatase, type I	2.94902						W1DUL8	Peptide deformylase	-1.28602
				W1DJR9	6-phosphofructokinase class II	4.08685						W1DUM9	DNA-directed RNA polymerase subunit alpha	-1.10202
				W1DJS1	Cytochrome O ubiquinol oxidase subunit I	5.52923						W1DUT3	Cystine ABC transporter, periplasmic cystine-binding protein FliY	-1.71816
				W1DJS2	Uncharacterized membrane protein YqjD	5.49604						W1DUX7	Iron-sulfur cluster carrier protein	-1.02637
				W1DJT0	ATP-dependent Clp protease ATP-binding subunit ClpX	5.34741						W1DV39	Uronate isomerase	-2.80073
				W1DJT4	Peptidylprolyl isomerase	3.12029						W1DVK4	Putative cation-transporting P-type ATPase	-2.85743
				W1DJT5	2-hydroxy-3-oxopropionate reductase	4.22711						W1DVU8	Putative acetyltransferase	-1.85636
				W1DJT7	1,4-dihydroxy-2-naphthoyl-CoA synthase	1.22686						W1DVX4	Glucans biosynthesis protein G	-2.31282
				W1DJV2	50S ribosomal protein L19	1.99954						W1DWC0	50S ribosomal protein L17	-1.60476
				W1DJV9	Universal stress protein F	1.79508						W1DWJ1	Outer membrane protein W	-1.16317
				W1DJW4	Anthranilate synthase, amidotransferase component / Anthranilate phosphoribosyltransferase	3.52624						W1DWJ3	Membrane alanine aminopeptidase N	-2.25315
				W1DK12	Periplasmic protein related to spheroblast formation	4.22087						W1DXE3	Uncharacterized protein	-3.05728
				W1DK31	Exodeoxyribonuclease III	3.26279						W1DY12	Phosphomannomutase	-3.27249
				W1DK62	Hypothetical oxidoreductase YqhD	3.2079						W1DY17	GTPase Era	-2.07192
				W1DK65	Galactokinase	2.92868
				W1DK89	Argininosuccinate lyase	1.18317
				W1DKA1	Aspartate ammonia-lyase	1.52124
				W1DKB8	Universal stress protein G	2.99115
				W1DKC0	Uncharacterized protein	1.51243
				W1DKE2	Formate-dependent phosphoribosylglycinamide formyltransferase	4.50498
				W1DKH1	3-dehydroquinate synthase	3.31429
				W1DKI0	Outer membrane lipoprotein Blc	1.07935
				W1DKK2	Na(+)-translocating NADH-quinone reductase subunit A	1.06296
				W1DKL7	Xanthine phosphoribosyltransferase	1.37045
				W1DKM1	Inhibitor of vertebrate lysozyme	1.18785
				W1DKM3	Phosphatase NudJ	2.73675
				W1DKN3	NADH-ubiquinone oxidoreductase chain G	3.87927
				W1DKN7	NADH-quinone oxidoreductase subunit A	1.39464
				W1DKQ1	Aldose 1-epimerase	2.37729
				W1DKQ7	Glutamate--cysteine ligase	1.56062
				W1DKR8	Arylsulfatase	1.51784
				W1DKS8	4-alpha-glucanotransferase (Amylomaltase)	4.73847
				W1DKV0	Nucleoside-specific channel-forming protein Tsx	2.16394
				W1DKW1	ATP-dependent Clp protease adapter protein ClpS	1.42082
				W1DKX0	3-to-5 exoribonuclease RNase R	1.43258
				W1DL15	Glycogen synthase, ADP-glucose transglucosylase	2.33027
				W1DL35	Succinate--CoA ligase [ADP-forming] subunit alpha	1.37496
				W1DL53	Probable malate:quinone oxidoreductase	2.41322
				W1DL66	AMP nucleosidase	3.41452
				W1DL74	Oligopeptide ABC transporter, periplasmic oligopeptide-binding protein OppA (TC 3.A.1.5.1)	1.5975
				W1DL83	4-hydroxy-3-methylbut-2-en-1-yl diphosphate synthase (flavodoxin)	4.93946
				W1DL87	Methionine ABC transporter permease protein	1.58079
				W1DL93	Candidate zinc-binding lipoprotein ZinT	1.57202
				W1DL95	Respiratory nitrate reductase alpha chain	1.98913
				W1DLA2	Glutamate synthase [NADPH] small chain	5.45382
				W1DLB4	ADP-heptose synthase / D-glycero-beta-D-manno-heptose 7-phosphate kinase	2.6378
				W1DLB5	Malate dehydrogenase	5.10659
				W1DLB6	Carbamoyl-phosphate synthase small chain	5.18761
				W1DLC1	Trehalose-6-phosphate hydrolase	1.23915
				W1DLE1	Enoyl-[acyl-carrier-protein] reductase [NADH]	3.89119
				W1DLE2	Protein YicC	3.32825
				W1DLF3	Phospho-N-acetylmuramoyl-pentapeptide-transferase	1.66227
				W1DLJ4	Phosphoenolpyruvate synthase	1.09254
				W1DLL3	LSU ribosomal protein L1p (L10Ae)	5.60186
				W1DLL8	Similarity with glutathionylspermidine synthase, group 1	2.30119
				W1DLM5	Purine-nucleoside phosphorylase	2.57408
				W1DLM9	Acetyl-coenzyme A synthetase	2.37889
				W1DLN7	Succinate-semialdehyde dehydrogenase [NAD] Succinate-semialdehyde dehydrogenase [NADP+]	5.59464
				W1DLQ6	Inosine-5-monophosphate dehydrogenase	3.7997
				W1DLR2	30S ribosomal protein S7	1.26765
				W1DLR8	COG0523: Putative GTPases (G3E family)	1.9365
				W1DLT9	Blue copper oxidase CueO	4.13337
				W1DLU1	Nitrite reductase [NAD(P)H] large subunit	3.46657
				W1DLV0	Alkyl hydroperoxide reductase protein F	4.49038
				W1DLV8	OsmC/Ohr family protein	1.80308
				W1DLW1	L,D-transpeptidase YbiS	2.91612
				W1DLW9	UDP-3-O-(3-hydroxymyristoyl)glucosamine N-acyltransferase	5.25127
				W1DLY1	Galactose-1-phosphate uridylyltransferase	1.58251
				W1DLY4	30S ribosomal protein S13	4.28687
				W1DM35	Formiminoglutamase	1.84879
				W1DM51	Acetyl-coenzyme A carboxyl transferase alpha chain	1.19045
				W1DM64	Aminoacyl-histidine dipeptidase (Peptidase D)	1.73536
				W1DM92	Periplasmic protein YqjC	4.30668
				W1DMA1	2,3-bisphosphoglycerate-dependent phosphoglycerate mutase	4.35607
				W1DMC5	Ribose-5-phosphate isomerase A	1.54379
				W1DME6	Acetolactate synthase, catabolic	1.62593
				W1DMF6	Alkyl hydroperoxide reductase subunit C-like protein	1.24227
				W1DMJ5	NAD synthetase	1.48149
				W1DMJ6	Ferrochelatase	2.0123
				W1DMK8	Alanine--tRNA ligase	2.87698
				W1DMQ4	GTPase Der	2.37951
				W1DMQ5	Shikimate kinase 1	4.52347
				W1DMS8	ATP-dependent Clp protease ATP-binding subunit ClpA	4.32441
				W1DMU8	Sigma factor RpoE negative regulatory protein RseB	1.56221
				W1DMV9	Hypothetical tRNA/rRNA methyltransferase yfiF	1.48129
				W1DMW8	Valine--tRNA ligase	5.36403
				W1DMY1	Phosphopantetheine adenylyltransferase	1.8548
				W1DN04	ATP-dependent helicase HrpA	2.33144
				W1DN10	DNA repair protein RadA	1.22362
				W1DN11	Cytochrome d ubiquinol oxidase subunit I	4.11295
				W1DN35	30S ribosomal protein S21	1.22394
				W1DN36	Glycine dehydrogenase (aminomethyl-transferring)	4.87906
				W1DN65	3-deoxy-D-manno-octulosonic-acid transferase	2.15413
				W1DN78	Formyltetrahydrofolate deformylase	2.24935
				W1DN90	Zinc ABC transporter, periplasmic-binding protein ZnuA	1.31666
				W1DNA3	Phosphopentomutase	1.23057
				W1DNE4	Putative exported protein	1.07437
				W1DNI1	Aldehyde dehydrogenase	1.28022
				W1DNI7	Serine transporter	1.23469
				W1DNJ1	Thiamine-monophosphate kinase	2.36687
				W1DNK1	Deoxyribose-phosphate aldolase	4.31992
				W1DNK3	FIG094199: Fumarylacetoacetate hydrolase	2.63311
				W1DNK6	Ribulose-phosphate 3-epimerase	1.22892
				W1DNN1	Endopeptidase La	1.14851
				W1DNN3	Diaminopimelate decarboxylase	4.49262
				W1DNQ2	GMP synthase [glutamine-hydrolyzing],amidotransferase subunit / GMP synthase [glutamine-hydrolyzing], ATP pyrophosphatase subunit	4.00689
				W1DNQ9	3-oxoacyl-[acyl-carrier-protein] synthase, KASI	1.45058
				W1DNR8	Putative oxidoreductase YncB	2.34607
				W1DNS8	ATP-dependent hsl protease ATP-binding subunit HslU	1.05974
				W1DNV6	D-alanyl-D-alanine carboxypeptidase	1.55277
				W1DNX3	(3R)-hydroxymyristoyl-[acyl carrier protein] dehydratase	4.75311
				W1DNX9	Predicted outer membrane lipoprotein YfeY	4.37242
				W1DNZ2	Polyribonucleotide nucleotidyltransferase	2.02394
				W1DNZ3	Endonuclease V	2.52645
				W1DP13	Chromosome (Plasmid) partitioning protein ParA	1.20829
				W1DP28	Putative sugar ABC transporter	1.22464
				W1DP52	Biosynthetic arginine decarboxylase	1.94074
				W1DP55	YrbA protein	4.9698
				W1DP71	Lysine--tRNA ligase	4.93813
				W1DP87	NADH-ubiquinone oxidoreductase chain G	3.28227
				W1DP89	Uncharacterized ABC transporter, auxiliary component YrbC	3.96336
				W1DPC6	Acetylglutamate kinase	5.44002
				W1DPE9	Methylglyoxal reductase, acetol producing / 2,5-diketo-D-gluconate reductase A	1.5192
				W1DPF2	Aminomethyltransferase	5.27498
				W1DPF7	Outer membrane protein YfgL, lipoprotein component of the protein assembly complex (Forms a complex with YaeT, YfiO, and NlpB)	5.33445
				W1DPF9	Uncharacterized protein	5.54767
				W1DPI1	Phenylalanyl-tRNA synthetase beta chain	1.57758
				W1DPI3	Universal stress protein E	4.91182
				W1DPJ4	ATP-dependent Clp protease ATP-binding subunit ClpA	3.06392
				W1DPK2	TldE protein, part of TldE/TldD proteolytic complex	4.26758
				W1DPL7	Protein ydjA	3.31311
				W1DPM0	Aspartyl-tRNA synthetase	2.60427
				W1DPM4	Iron-sulfur cluster assembly protein SufD	4.8255
				W1DPM7	Threonine--tRNA ligase	1.02178
				W1DPP5	Right origin-binding protein	1.15585
				W1DPR6	Uncharacterized protein YfaZ	3.79597
				W1DPS4	Transketolase, C-terminal section	1.3424
				W1DPU0	Glycerol-3-phosphate dehydrogenase	2.27395
				W1DPX5	Mannonate dehydratase	1.47212
				W1DPY5	ABC transporter, ATP-binding protein	1.25859
				W1DPY9	Probable phosphoglycerate mutase GpmB	1.37466
				W1DPZ8	Glycine--tRNA ligase alpha subunit	2.21122
				W1DQ07	Phosphopantothenoylcysteine decarboxylase / Phosphopantothenoylcysteine synthetase	1.90085
				W1DQ10	1,3-propanediol dehydrogenase	1.11314
				W1DQ33	UDP-N-acetylmuramoylalanyl-D-glutamate--2,6-diaminopimelate ligase	3.16018
				W1DQ53	Lipoprotein NlpD	3.33506
				W1DQ81	Histidine ammonia-lyase	1.97612
				W1DQ82	Epi-inositol hydrolase	2.08953
				W1DQ92	Lysine-arginine-ornithine-binding periplasmic protein (TC 3.A.1.3.1)	1.81547
				W1DQA5	Putative aldo/keto reductase	5.25721
				W1DQB5	Myo-inositol 2-dehydrogenase 1	2.44686
				W1DQD2	DNA-directed RNA polymerase beta subunit	3.51647
				W1DQD7	Uncharacterized protein	5.14618
				W1DQE2	RNA polymerase sigma factor RpoS	3.74525
				W1DQF5	Putative metal chaperone, involved in Zn homeostasis, GTPase of COG0523 family	1.62824
				W1DQH0	Fatty acid metabolism regulator protein	1.17598
				W1DQH4	Translation elongation factor G	1.78869
				W1DQK4	Sulfate and thiosulfate binding protein CysP	3.84152
				W1DQK5	Serine protein kinase (PrkA protein), P-loop containing	1.97286
				W1DQM1	Phage shock protein A	1.32543
				W1DQR7	Argininosuccinate synthase	5.29932
				W1DQS2	Periplasmic serine endoprotease DegP-like	1.39885
				W1DQU2	5-methylthioadenosine/S-adenosylhomocysteine nucleosidase	1.19648
				W1DQV1	ATP-dependent zinc metalloprotease FtsH	5.62082
				W1DQV6	Arginine decarboxylase	1.8655
				W1DQX3	Arginine--tRNA ligase	1.48544
				W1DR02	Chromosome initiation inhibitor	1.28065
				W1DR04	Trehalose 6-phosphate phosphatase	3.50027
				W1DR16	Ferritin-like protein 2	1.76216
				W1DR25	N-3-oxohexanoyl-L-homoserine lactone quorum-sensing transcriptional activator @ N-3-oxooctanoyl-L-homoserine lactone quorum-sensing transcriptional activator	1.74697
				W1DR30	Alpha-acetolactate decarboxylase	2.13919
				W1DR40	GTP pyrophosphokinase, (P)ppGpp synthetase I / Guanosine-3,5-bis(Diphosphate) 3-pyrophosphohydrolase	2.03292
				W1DR46	Putative inner membrane protein	1.66778
				W1DR50	UDP-N-acetylglucosamine 1-carboxyvinyltransferase	3.26234
				W1DR89	Phosphoenolpyruvate carboxykinase [ATP]	1.23482
				W1DRB3	Two-component system response regulator OmpR	1.26644
				W1DRB5	Translation initiation factor IF-3	2.81376
				W1DRC7	DcrB protein	3.57771
				W1DRD3	Quinolinate phosphoribosyltransferase [decarboxylating]	2.01307
				W1DRE1	Protein ydgH	3.30895
				W1DRE5	NAD(P) transhydrogenase subunit beta	4.33642
				W1DRF0	Iron-sulfur cluster assembly ATPase protein SufC	3.60719
				W1DRH7	Phenylalanyl-tRNA synthetase beta chain	4.04084
				W1DRI7	Lysyl-tRNA synthetase (Class II)	2.6888
				W1DRJ3	Lipid A 1-diphosphate synthase	1.86814
				W1DRL3	Ribonucleoside-diphosphate reductase subunit beta	5.43354
				W1DRL8	Aspartyl-tRNA synthetase	5.45756
				W1DRS4	Amidophosphoribosyltransferase	3.45122
				W1DRU0	Putative stability/partitioning protein encoded within prophage CP-933T	3.4881
				W1DRY5	Solute-binding periplasmic protein of iron/siderophore ABC transporter	2.1517
				W1DS39	Iron-sulfur cluster regulator IscR	1.03866
				W1DSA4	NADPH-dependent 7-cyano-7-deazaguanine reductase	2.27479
				W1DSA7	Osmotically inducible protein C	5.50029
				W1DSB4	Dipeptidyl carboxypeptidase Dcp	2.43379
				W1DSC1	Oxidoreductase	3.74702
				W1DSC3	Serine protein kinase (PrkA protein), P-loop containing	5.00201
				W1DSE2	Probable GTP-binding protein EngB	4.27928
				W1DSG2	Promiscuous sugar phosphatase YidA, haloacid dehalogenase-like phosphatase family	4.0061
				W1DSI1	Formate dehydrogenase O alpha subunit @ selenocysteine-containing	1.42715
				W1DSP7	Multimodular transpeptidase-transglycosylase	2.48165
				W1DSS1	Maltose/maltodextrin import ATP-binding protein MalK	1.80888
				W1DST0	FIG000325: clustered with transcription termination protein NusA	2.10104
				W1DST5	Uncharacterized protein	1.64898
				W1DSU3	Ubiquinone/menaquinone biosynthesis C-methyltransferase UbiE	2.83788
				W1DT03	Uncharacterized protein	3.90571
				W1DT07	Exopolyphosphatase	1.5904
				W1DT56	Osmoprotectant ABC transporter binding protein YehZ	5.06472
				W1DT72	Multimodular transpeptidase-transglycosylase	1.92305
				W1DT79	Lysyl-tRNA synthetase (Class II)	1.67936
				W1DT92	Glycine dehydrogenase [decarboxylating] (Glycine cleavage system P protein)	1.88854
				W1DTA2	PTS system, N-acetylglucosamine-specific IIA component / PTS system,N-acetylglucosamine-specific IIB component / PTS system, N-acetylglucosamine-specific IIC component	1.57955
				W1DTB3	N-acetylglucosamine-6-phosphate deacetylase	5.11062
				W1DTJ5	Carbonic anhydrase	1.93825
				W1DTL1	Uncharacterized membrane lipoprotein clustered with tellurite resistance proteins TehA/TehB	5.12825
				W1DTL4	Spermidine synthase	4.00077
				W1DTN1	5-hydroxyisourate hydrolase	3.48075
				W1DTQ0	UPF0301 protein	1.38479
				W1DTR6	Riboflavin synthase eubacterial/eukaryotic	5.01701
				W1DTT0	Oxidoreductase	1.41341
				W1DTU1	Lead, cadmium, zinc and mercury transporting ATPase Copper-translocating P-type ATPase	1.36581
				W1DTU5	Lipoprotein	2.99209
				W1DU29	Signal recognition particle receptor FtsY	3.30697
				W1DU54	3-hydroxypropionate dehydrogenase	2.54831
				W1DU59	Imidazole glycerol phosphate synthase subunit HisF	2.04897
				W1DU66	Glutamine synthetase	1.40756
				W1DUA5	Outer membrane protein A	1.18235
				W1DUB1	Ribonucleotide reductase of class Ia (Aerobic),alpha subunit	1.77886
				W1DUC5	Uncharacterized protein	3.52867
				W1DUC7	UTP--glucose-1-phosphate uridylyltransferase	5.47999
				W1DUH1	Phosphoribosylformylglycinamidine synthase,synthetase subunit / Phosphoribosylformylglycinamidine synthase, glutamine amidotransferase subunit	1.46301
				W1DUH4	Glutamate transport ATP-binding protein	1.2453
				W1DUJ8	Iron-sulfur cluster insertion protein ErpA	1.68206
				W1DUK0	Curved DNA-binding protein	4.60668
				W1DUN4	Glutamine ABC transporter, periplasmic glutamine-binding protein (TC 3.A.1.3.2)	3.1785
				W1DUR3	Maltoporin (Maltose/maltodextrin high-affinity receptor, phage lambda receptor protein)	1.01167
				W1DUS3	UvrABC system protein C	1.38412
				W1DUV2	Alkanesulfonate utilization operon LysR-family regulator CbI	5.0084
				W1DV94	Histidine biosynthesis bifunctional protein HisB	1.59912
				W1DV95	Asparagine synthetase [glutamine-hydrolyzing]	2.50463
				W1DVG6	Ribosomal RNA large subunit methyltransferase M	1.14822
				W1DVJ7	Amidophosphoribosyltransferase	4.6492
				W1DVS3	General stress protein 18	4.70067
				W1DVV0	Acid phosphatase	1.11498
				W1DVY3	Thioredoxin/glutathione peroxidase BtuE	4.44084
				W1DW17	FIG002208: Acetyltransferase	4.06775
				W1DW23	Glycosyltransferase	1.54173
				W1DW50	Predicted membrane fusion protein (MFP) component of efflux pump, membrane anchor protein YbhG	2.1727
				W1DW69	DNA-binding transcriptional regulator NtrC	1.63556
				W1DW86	Formate dehydrogenase O alpha subunit @ selenocysteine-containing	2.84497
				W1DWC3	Low molecular weight protein-tyrosine-phosphatase Wzb	2.66491
				W1DWC4	LPS-assembly lipoprotein LptE	4.63184
				W1DWD0	Uncharacterized protein	1.55954
				W1DX06	Glucosamine-6-phosphate deaminase	1.25667
				W1DXA8	Uncharacterized protein	2.59416
				W1DXM9	5-keto-2-deoxygluconokinase / uncharacterized domain	2.06549
				W1DXT9	Protein translocase subunit SecA	1.12057
				W1DY24	Elongation factor 4	1.83534
				W1DY37	Leucyl-tRNA synthetase	4.55778

## Sheet: A2B2
Protein	Protein.name	log2(A2/B2)		Protein	Protein.name	log2(A2/B2)		Protein	Protein.name	log2(A2/B2)		Protein	Protein.name	log2(A2/B2)
W1DCK7	Anaerobic dimethyl sulfoxide reductase chain A	6.21065		W1DCM4	Putative cold-shock protein	1.97077		W1DD01	Lactoylglutathione lyase	-5.16306		W1DCH6	Isocitrate lyase	-2.24881
W1DD55	Uncharacterized protein	5.02297		W1DCS9	Putative acetyltransferase	1.53687		W1DFJ2	Ubiquinol oxidase subunit 2	-5.0866		W1DCN3	NADH dehydrogenase	-1.23342
W1DDW9	Outer-membrane lipoprotein carrier protein	4.38379		W1DD42	Galactose/methyl galactoside ABC transport system, D-galactose-binding periplasmic protein MglB (TC 3.A.1.2.3)	2.24829		W1DFL9	4-hydroxybenzoate transporter	-7.14882		W1DD89	Phosphoribosylamine--glycine ligase	-1.00565
W1DEA9	2,3-bisphosphoglycerate-independent phosphoglycerate mutase	5.65674		W1DDH7	Acetolactate synthase small subunit	1.04631		W1DFQ9	Alkaline phosphatase	-4.91992		W1DDC3	3-dehydroquinate dehydratase	-2.70159
W1DEH2	Aconitate hydratase	5.79271		W1DDM1	D-alanine--D-alanine ligase	3.6455		W1DG02	PTS system, mannose-specific IIB component	-4.27806		W1DDW4	Glutaredoxin	-1.03903
W1DF25	Anaerobic dimethyl sulfoxide reductase chain A	7.73588		W1DE29	DNA topoisomerase I	2.28533		W1DGF7	Gamma-aminobutyrate:alpha-ketoglutarate aminotransferase	-5.40079		W1DE99	Succinate dehydrogenase flavoprotein subunit	-1.92398
W1DFL6	10 kDa chaperonin	4.73717		W1DE38	GTP cyclohydrolase II	3.15976		W1DGK4	Phosphoglucomutase	-4.25656		W1DEQ9	Formate efflux transporter (TC 2.A.44 family)	-3.53182
W1DFW9	RNA polymerase-associated protein RapA	4.54863		W1DEA5	NAD-dependent malic enzyme	1.59753		W1DIX8	Alpha-1,4 glucan phosphorylase	-5.69639		W1DEU9	Iron(III) dicitrate transport protein FecA	-3.61234
W1DG75	Homoserine kinase	5.519		W1DEE8	DNA topoisomerase 4 subunit A	1.79965		W1DK11	Chaperone FimC	-6.28123		W1DF32	Pyruvate formate-lyase	-1.56772
W1DGC1	Lysine decarboxylase, inducible	7.22695		W1DEH0	UPF0227 protein	3.35454		W1DK65	Galactokinase	-6.25418		W1DF57	Putrescine ABC transporter putrescine-binding protein PotF (TC 3.A.1.11.2)	-1.31603
W1DHU5	Thiol peroxidase, Bcp-type	4.72737		W1DEJ4	Ribosome-binding ATPase YchF	3.51074		W1DLP1	Carbon starvation protein A paralog	-4.27262		W1DF59	Endoribonuclease L-PSP	-1.01001
W1DI82	NADH-quinone oxidoreductase subunit B	6.47743		W1DEK0	Pseudouridine synthase	1.41144		W1DLP5	50S ribosomal protein L7/L12	-5.28523		W1DF91	Tyrosyl-tRNA synthetase	-1.51537
W1DIC3	Aconitate hydratase	4.37021		W1DF42	tRNA uridine 5-carboxymethylaminomethyl modification enzyme MnmG	2.04112		W1DLY1	Galactose-1-phosphate uridylyltransferase	-5.38418		W1DFB0	Manganese superoxide dismutase	-2.6727
W1DIM9	Autoinducer 2 (AI-2) aldolase LsrF	4.7111		W1DF95	ThiJ/PfpI family protein	1.416		W1DMX1	FMN-dependent NADH-azoreductase	-4.26415		W1DFB5	tRNA modification GTPase MnmE	-1.13182
W1DJ43	Galactose operon repressor, GalR-LacI family of transcriptional regulators	4.41034		W1DF96	Outer membrane lipoprotein pcp	1.70327		W1DN80	2,3-butanediol dehydrogenase, S-alcohol forming,(R)-acetoin-specific / Acetoin (Diacetyl) reductase	-4.06126		W1DFC2	Acetolactate synthase	-1.31374
W1DJ47	Protein HflC	5.58493		W1DF98	Topoisomerase IV subunit B	1.12643		W1DNI1	Aldehyde dehydrogenase	-4.71663		W1DFG4	PTS IIA-like nitrogen-regulatory protein PtsN	-2.45277
W1DJS2	Uncharacterized membrane protein YqjD	4.98253		W1DFB6	RNA chaperone ProQ	1.68349		W1DPM0	Aspartyl-tRNA synthetase	-5.35594		W1DFG7	N-ethylmaleimide reductase	-2.88561
W1DKN3	NADH-ubiquinone oxidoreductase chain G	5.63687		W1DFD6	Phosphate ABC transporter, periplasmic phosphate-binding protein PstS (TC 3.A.1.7.1)	1.39921		W1DPZ8	Glycine--tRNA ligase alpha subunit	-5.37989		W1DFJ8	Pyridoxine/pyridoxamine 5-phosphate oxidase	-1.54341
W1DKR1	Translational regulator CsrA	4.44515		W1DFK8	Inorganic pyrophosphatase	1.5118		W1DQ82	Epi-inositol hydrolase	-4.24873		W1DFQ2	Non-specific ribonucleoside hydrolase RihC	-2.82723
W1DLG0	DNA-binding protein H-NS	6.50669		W1DFN3	Tail-specific protease	2.61456		W1DQB5	Myo-inositol 2-dehydrogenase 1	-6.29711		W1DFR5	Glutamine ABC transporter, periplasmic glutamine-binding protein (TC 3.A.1.3.2)	-2.45545
W1DLU3	Peptidyl-prolyl cis-trans isomerase	4.46		W1DFP3	Transcriptional regulator MraZ	1.1998		W1DQW1	Arabinose-proton symporter	-5.41183		W1DFR9	Lipopolysaccharide ABC transporter, ATP-binding protein LptB	-1.23003
W1DM51	Acetyl-coenzyme A carboxyl transferase alpha chain	4.86844		W1DFR6	Acyl carrier protein	3.26581		W1DRB5	Translation initiation factor IF-3	-5.30724		W1DFT0	Type 1 fimbrae adaptor subunit FimF	-3.99631
W1DNA3	Phosphopentomutase	5.20237		W1DFS7	Pyruvate oxidase [ubiquinone, cytochrome]	2.80125		W1DRZ1	Methylmalonate-semialdehyde dehydrogenase [inositol]	-4.1204		W1DFZ7	Cytokinin riboside 5-monophosphate phosphoribohydrolase	-2.04419
W1DNE4	Putative exported protein	4.77822		W1DFU2	Erythronate-4-phosphate dehydrogenase	2.10136		W1DRZ2	Putative aldo/keto reductase	-4.23712		W1DG48	1-phosphofructokinase	-1.4463
W1DP34	Transcription termination/antitermination protein NusA	5.93695		W1DFV4	Hypothetical lipoprotein YajG	1.35229		W1DS03	Inosose dehydratase	-5.75893		W1DG60	FIG136845: Rhodanese-related sulfurtransferase	-1.90892
W1DPE9	Methylglyoxal reductase, acetol producing / 2,5-diketo-D-gluconate reductase A	4.91522		W1DFV9	ATP-dependent Clp protease proteolytic subunit	2.01812		W1DSS1	Maltose/maltodextrin import ATP-binding protein MalK	-5.49178		W1DG72	Aerobic respiration control protein arcA	-3.51589
W1DPI4	Cold shock protein CspC	4.47269		W1DFW8	Exoribonuclease 2	1.47703		W1DSW9	Nucleoside diphosphate kinase	-4.27696		W1DG79	Manganese ABC transporter, ATP-binding protein SitB	-3.06838
W1DR88	Quinone-dependent D-lactate dehydrogenase	5.85659		W1DFX7	Aspartokinase / Homoserine dehydrogenase	3.07607		W1DUA5	Outer membrane protein A	-4.97487		W1DG97	Outer membrane protein Imp, required for envelope biogenesis / Organic solvent tolerance protein	-1.3801
W1DS27	Uncharacterized protein	4.51687		W1DG35	Glutamate Aspartate periplasmic binding protein GltI (TC 3.A.1.3.4)	1.33964						W1DGB0	Protein yifE	-1.04063
W1DSA7	Osmotically inducible protein C	4.88686		W1DG49	Ethanolamine utilization protein EutQ	1.3377						W1DGB9	DNA topoisomerase I	-1.78836
W1DSH6	5-methylthioadenosine/S-adenosylhomocysteine nucleosidase	4.39957		W1DG54	Transaldolase	1.37422						W1DGD8	Transcription termination factor Rho	-1.11331
W1DSN0	UTP--glucose-1-phosphate uridylyltransferase	4.9047		W1DG85	Polymyxin resistance protein ArnA_DH,UDP-glucuronic acid decarboxylase / Polymyxin resistance protein ArnA_FT, UDP-4-amino-4-deoxy-L-arabinose formylase	1.01303						W1DGE1	Phosphoenolpyruvate carboxykinase (ATP)	-2.61457
W1DTT3	Lipid A export ATP-binding/permease protein MsbA	4.46141		W1DGB5	Branched-chain-amino-acid aminotransferase	1.55175						W1DGI9	Citrate synthase	-1.23605
W1DVN0	Uncharacterized protein	5.12764		W1DGC0	PTS system, fructose-specific IIB component / PTS system, fructose-specific IIC component	4.04855						W1DGK6	Chorismate synthase	-2.62087
W1DW65	DNA polymerase I	4.77579		W1DGC3	Aconitate hydratase	3.64904						W1DGP1	Homoserine O-succinyltransferase	-2.47309
W1DY12	Phosphomannomutase	4.5149		W1DGD0	50S ribosomal protein L3 glutamine methyltransferase	1.88216						W1DGS0	Sulfate adenylyltransferase	-1.23063
				W1DGF2	Glucose-6-phosphate 1-dehydrogenase	3.30627						W1DH01	GTP cyclohydrolase 1	-2.81611
				W1DGG5	6-phosphogluconolactonase	2.00717						W1DH07	Universal stress protein	-2.35478
				W1DGH4	Glutaminyl-tRNA synthetase	2.57291						W1DH45	ABC transporter, periplasmic spermidine putrescine-binding protein PotD (TC 3.A.1.11.1)	-1.04274
				W1DGJ1	Ribosomal RNA small subunit methyltransferase A	1.51446						W1DH46	Ornithine carbamoyltransferase	-2.11071
				W1DGJ6	DNA topoisomerase I	2.31588						W1DH48	Probable tonB-dependent receptor yncD	-1.11098
				W1DGL0	Phosphohistidine phosphatase SixA	1.3099						W1DH61	NAD-dependent glyceraldehyde-3-phosphate dehydrogenase	-2.04303
				W1DGP3	Rod shape-determining protein MreB	3.56295						W1DH94	Oxidoreductase	-2.62796
				W1DGP4	High-affinity leucine-specific transport system,periplasmic binding protein LivK (TC 3.A.1.4.1)	3.94079						W1DHA1	Glutamate dehydrogenase	-1.3602
				W1DGT1	Ferric uptake regulation protein	2.63289						W1DHA2	Dihydroneopterin triphosphate epimerase	-2.88954
				W1DGW9	Periplasmic Murein Peptide-Binding Protein MppA	1.77315						W1DHB2	Phosphate ABC transporter, periplasmic phosphate-binding protein PstS (TC 3.A.1.7.1)	-2.7426
				W1DGZ2	Cyclic di-GMP-binding protein	4.30933						W1DHB7	N-acetylglucosamine-1-phosphate uridyltransferase / Glucosamine-1-phosphate N-acetyltransferase	-1.45341
				W1DHB5	HD-GYP domain	2.65861						W1DHC3	ATP synthase gamma chain	-2.77272
				W1DHD9	Aspartate carbamoyltransferase	2.97799						W1DHG2	Dipeptide-binding ABC transporter, periplasmic substrate-binding component (TC 3.A.1.5.2) Putative hemin-binding lipoprotein	-1.37024
				W1DHG4	Histidine--tRNA ligase	3.81911						W1DHI3	Dihydrodipicolinate synthase	-1.48371
				W1DHG6	Fructose repressor FruR, LacI family	1.20368						W1DHM0	SSU ribosomal protein S20p	-2.27899
				W1DHH6	Enoyl-CoA hydratase / Delta(3)-cis-delta(2)-trans-enoyl-CoA isomerase / 3-hydroxyacyl-CoA dehydrogenase / 3-hydroxybutyryl-CoA epimerase	1.04026						W1DHM8	3-isopropylmalate dehydrogenase	-3.62385
				W1DHL5	Chaperone protein DnaJ	1.39628						W1DHM9	ATP synthase subunit b	-1.44799
				W1DHM1	Glucose dehydrogenase, PQQ-dependent	1.85763						W1DHP2	Dipeptide-binding ABC transporter, periplasmic substrate-binding component (TC 3.A.1.5.2) Putative hemin-binding lipoprotein	-1.10802
				W1DHN6	DNA ligase	2.76528						W1DHP5	RNase adapter protein RapZ	-1.61108
				W1DHP6	NADPH:quinone oxidoreductase 2	2.06564						W1DHQ0	Pyruvate oxidase [ubiquinone, cytochrome]	-3.28815
				W1DHT4	Endopeptidase La	1.5139						W1DHQ6	Maltoporin (Maltose/maltodextrin high-affinity receptor, phage lambda receptor protein)	-2.33542
				W1DHW4	Ferrous iron transport periplasmic protein EfeO,contains peptidase-M75 domain and (Frequently) cupredoxin-like domain	1.43827						W1DHQ8	Glutathione S-transferase	-1.64314
				W1DHX2	Succinate dehydrogenase iron-sulfur subunit	2.53761						W1DHR6	UDP-4-amino-4-deoxy-L-arabinose--oxoglutarate aminotransferase	-1.91655
				W1DHZ6	Chromosome partition protein MukB	2.3083						W1DHT9	Putative ATPase component of ABC transporter with duplicated ATPase domain	-1.90075
				W1DI41	Alkyl hydroperoxide reductase protein C	1.81447						W1DHY1	Uncharacterized protein	-2.77281
				W1DI68	Elongation factor P	2.32342						W1DHZ2	Alpha-dextrin endo-1,6-alpha-glucosidase (Pullulanase)	-2.99079
				W1DIA3	Oligopeptidase A	1.06679						W1DI75	Galactokinase	-3.80302
				W1DIA6	Outer-membrane lipoprotein LolB	1.33585						W1DI85	Glucosamine--fructose-6-phosphate aminotransferase [isomerizing]	-2.43796
				W1DIA8	Uncharacterized protein	2.73875						W1DI98	Outer membrane protein assembly factor BamD	-1.47542
				W1DIC2	Biosynthetic Aromatic amino acid aminotransferase alpha	1.54352						W1DIB2	Protein RecA	-1.98628
				W1DIE5	Aspartate-semialdehyde dehydrogenase	3.65679						W1DIB5	DNA topoisomerase I	-2.8383
				W1DIF0	Glycerophosphoryl diester phosphodiesterase,periplasmic	3.202						W1DIC5	Type 1 fimbriae anchoring protein FimD	-3.15102
				W1DIH3	Glucose-6-phosphate 1-dehydrogenase	1.02822						W1DIJ9	Uncharacterized protein	-2.04576
				W1DII4	Succinate dehydrogenase hydrophobic membrane anchor subunit	1.25491						W1DIK7	Hydrogen peroxide-inducible genes activator	-3.10909
				W1DIM3	Probable cytosol aminopeptidase	1.34635						W1DIM5	Acetolactate synthase large subunit	-1.83772
				W1DIM6	LPS-assembly protein LptD	1.5691						W1DIR3	4-hydroxy-2-oxoglutarate aldolase @ 2-dehydro-3-deoxyphosphogluconate aldolase	-2.00465
				W1DIN6	Phosphoglucomutase	1.94978						W1DIR4	Succinate--CoA ligase [ADP-forming] subunit beta	-1.19226
				W1DIP6	ATP-dependent RNA helicase RhlB	3.0952						W1DIR7	Aspartokinase	-1.37428
				W1DIQ6	UDP-glucose dehydrogenase	2.88641						W1DIS2	Zinc ABC transporter, periplasmic-binding protein ZnuA	-1.52183
				W1DIR6	NADH-quinone oxidoreductase subunit F	4.08734						W1DIT2	Branched-chain amino acid ABC transporter, amino acid-binding protein (TC 3.A.1.4.1)	-1.67099
				W1DIR9	Cytochrome d ubiquinol oxidase subunit II	1.2957						W1DIU3	Pectinesterase	-1.35616
				W1DIT4	PTS system, trehalose-specific IIB component / PTS system, trehalose-specific IIC component	1.8069						W1DIV4	YciL protein	-1.88422
				W1DIV3	Glutaminyl-tRNA synthetase	3.75042						W1DIY2	Lysine decarboxylase, inducible	-2.46345
				W1DIX0	Outer membrane protein C	1.23948						W1DJ52	2-Keto-3-deoxy-D-manno-octulosonate-8-phosphate synthase	-1.74038
				W1DIX1	UTP--glucose-1-phosphate uridylyltransferase	1.32128						W1DJ61	2-amino-3-ketobutyrate coenzyme A ligase	-2.87768
				W1DIY7	Alpha-1,4 glucan phosphorylase	3.06374						W1DJ96	Enolase-phosphatase E1	-1.50149
				W1DJ01	Putative cytochrome d ubiquinol oxidase subunit III (Cytochrome bd-I oxidase subunit III)	1.66787						W1DJF2	GMP synthase (glutamine-hydrolyzing)	-2.61334
				W1DJ29	PTS system, maltose and glucose-specific IIC component / PTS system, maltose and glucose-specific IIB component	4.15522						W1DJF8	Formyltetrahydrofolate deformylase	-2.75386
				W1DJ53	23S rRNA (guanosine-2-O-)-methyltransferase RlmB	1.96346						W1DJI1	Glycine cleavage system transcriptional antiactivator GcvR	-1.07336
				W1DJ62	Biotin carboxyl carrier protein of acetyl-CoA carboxylase	3.91752						W1DJI6	Glutamate synthase [NADPH] small chain	-1.82792
				W1DJB3	3-to-5 exoribonuclease RNase R	3.66525						W1DJI7	Probable exported protein YPO4070	-2.63446
				W1DJE4	Ribonucleotide reductase of class III (Anaerobic), large subunit	1.72786						W1DJJ5	Homolog of E. coli HemX protein	-1.74886
				W1DJE8	Thymidine kinase	1.83654						W1DJK3	Ferrous iron transport periplasmic protein EfeO,contains peptidase-M75 domain and (Frequently) cupredoxin-like domain	-1.21564
				W1DJJ0	Ribulosamine/erythrulosamine 3-kinase potentially involved in protein deglycation	1.99453						W1DJL8	Transcription-repair coupling factor	-2.0628
				W1DJJ6	DNA-directed RNA polymerase subunit omega	3.08277						W1DJN2	Lipoprotein	-2.00864
				W1DJJ8	Periplasmic serine endoprotease DegP-like	1.63862						W1DJP3	NAD(P)H-flavin reductase	-2.19043
				W1DJN6	30S ribosomal protein S11	1.98865						W1DJQ9	Fructose-1,6-bisphosphatase, type I	-1.17633
				W1DJP6	50S ribosomal protein L24	1.19179						W1DJS1	Cytochrome O ubiquinol oxidase subunit I	-1.44165
				W1DJQ5	50S ribosomal protein L4	1.3576						W1DJT2	Carbamoyl-phosphate synthase large chain	-2.24988
				W1DJQ8	Bacterioferritin	1.99677						W1DJT4	Peptidylprolyl isomerase	-1.11033
				W1DJR9	6-phosphofructokinase class II	1.40816						W1DJT5	2-hydroxy-3-oxopropionate reductase	-1.46266
				W1DJT0	ATP-dependent Clp protease ATP-binding subunit ClpX	1.46635						W1DJT7	1,4-dihydroxy-2-naphthoyl-CoA synthase	-1.29797
				W1DJU8	Fe/S biogenesis protein NfuA	1.69098						W1DK40	Molybdopterin biosynthesis Mog protein,molybdochelatase	-1.7845
				W1DJV6	Signal recognition particle protein	1.21955						W1DK62	Hypothetical oxidoreductase YqhD	-3.14181
				W1DJV9	Universal stress protein F	4.00741						W1DK66	Threonine synthase	-1.55591
				W1DJX9	Efflux pump membrane transporter	1.20234						W1DK89	Argininosuccinate lyase	-1.28368
				W1DJY3	Acetyl-coenzyme A synthetase	2.9989						W1DKB3	Dihydroxy-acid dehydratase	-1.59099
				W1DJZ9	High frequency lysogenization protein HflD homolog	2.27198						W1DKB5	30S ribosomal protein S10	-1.65393
				W1DK84	(3R)-hydroxymyristoyl-[acyl carrier protein] dehydratase	3.55902						W1DKG4	Chorismate mutase I / Prephenate dehydratase	-1.20039
				W1DK92	Chorismate mutase I / Prephenate dehydratase	1.48147						W1DKH1	3-dehydroquinate synthase	-2.61264
				W1DK99	Protein translocase subunit SecY	2.7436						W1DKM5	Protein-export membrane protein SecF	-1.04142
				W1DKA4	Translation elongation factor Tu	1.20685						W1DKQ1	Aldose 1-epimerase	-3.84583
				W1DKA8	30S ribosomal protein S17	1.70217						W1DKR8	Arylsulfatase	-1.09547
				W1DKB8	Universal stress protein G	1.59489						W1DKV0	Nucleoside-specific channel-forming protein Tsx	-1.72525
				W1DKC0	Uncharacterized protein	2.86927						W1DKW4	Phosphatidylserine decarboxylase proenzyme	-2.55045
				W1DKI0	Outer membrane lipoprotein Blc	2.30103						W1DL10	Tartrate dehydrogenase / Tartrate decarboxylase / D-malic enzyme	-1.84714
				W1DKM1	Inhibitor of vertebrate lysozyme	2.00382						W1DL74	Oligopeptide ABC transporter, periplasmic oligopeptide-binding protein OppA (TC 3.A.1.5.1)	-1.01431
				W1DKN7	NADH-quinone oxidoreductase subunit A	1.7907						W1DL75	Uncharacterized protein	-1.36013
				W1DKX0	3-to-5 exoribonuclease RNase R	3.53543						W1DL87	Methionine ABC transporter permease protein	-2.35372
				W1DKZ0	Pyruvate formate-lyase	2.5803						W1DLA0	Dihydroorotate dehydrogenase (quinone)	-3.72288
				W1DKZ6	L-threonine 3-dehydrogenase	1.82746						W1DLB3	Tol-Pal system protein TolQ	-3.19852
				W1DL15	Glycogen synthase, ADP-glucose transglucosylase	1.46255						W1DLB4	ADP-heptose synthase / D-glycero-beta-D-manno-heptose 7-phosphate kinase	-3.89321
				W1DL27	Peroxidase	1.07145						W1DLE1	Enoyl-[acyl-carrier-protein] reductase [NADH]	-1.70881
				W1DL53	Probable malate:quinone oxidoreductase	4.1263						W1DLE2	Protein YicC	-1.44679
				W1DL66	AMP nucleosidase	1.54954						W1DLQ6	Inosine-5-monophosphate dehydrogenase	-1.05093
				W1DL95	Respiratory nitrate reductase alpha chain	4.21651						W1DLR2	30S ribosomal protein S7	-1.88227
				W1DLA5	Dihydrolipoamide succinyltransferase component (E2) of 2-oxoglutarate dehydrogenase complex	2.38075						W1DLR8	COG0523: Putative GTPases (G3E family)	-1.59164
				W1DLC1	Trehalose-6-phosphate hydrolase	1.78681						W1DLV8	OsmC/Ohr family protein	-1.462
				W1DLD2	Ribonuclease PH	1.66764						W1DLW9	UDP-3-O-(3-hydroxymyristoyl)glucosamine N-acyltransferase	-1.12121
				W1DLF3	Phospho-N-acetylmuramoyl-pentapeptide-transferase	1.23388						W1DLY3	GMP synthase [glutamine-hydrolyzing],amidotransferase subunit / GMP synthase [glutamine-hydrolyzing], ATP pyrophosphatase subunit	-1.12096
				W1DLJ0	ClpXP protease specificity-enhancing factor / Stringent starvation protein B	1.47057						W1DLY4	30S ribosomal protein S13	-1.51275
				W1DLJ4	Phosphoenolpyruvate synthase	1.32302						W1DM35	Formiminoglutamase	-3.32708
				W1DLL8	Similarity with glutathionylspermidine synthase, group 1	3.13151						W1DM47	Acyl-[acyl-carrier-protein]--UDP-N-acetylglucosamine O-acyltransferase	-3.20652
				W1DLM3	PTS system, cellobiose-specific IIB component	3.89843						W1DM58	Phosphoribosylformylglycinamidine synthase,synthetase subunit / Phosphoribosylformylglycinamidine synthase, glutamine amidotransferase subunit	-1.35692
				W1DLN7	Succinate-semialdehyde dehydrogenase [NAD] Succinate-semialdehyde dehydrogenase [NADP+]	2.10991						W1DM64	Aminoacyl-histidine dipeptidase (Peptidase D)	-3.88058
				W1DLQ0	DNA-directed RNA polymerase beta subunit	1.05412						W1DM82	Chromosome (Plasmid) partitioning protein ParB	-2.93248
				W1DLT4	Molybdenum cofactor biosynthesis protein B	1.92375						W1DM95	Xaa-Pro aminopeptidase	-1.43231
				W1DLV0	Alkyl hydroperoxide reductase protein F	2.25706						W1DMA1	2,3-bisphosphoglycerate-dependent phosphoglycerate mutase	-1.27145
				W1DLW1	L,D-transpeptidase YbiS	3.55839						W1DMD7	Autoinducer 2 (AI-2) ABC transport system,periplasmic AI-2 binding protein LsrB	-2.82325
				W1DLX0	Glutamate 5-kinase / RNA-binding C-terminal domain PUA	2.24621						W1DME6	Acetolactate synthase, catabolic	-1.39066
				W1DLX7	Alcohol dehydrogenase	2.69838						W1DMF9	Nicotinamidase family protein YcaC	-3.63699
				W1DLY8	50S ribosomal protein L18	1.56759						W1DMH3	Recombination-associated protein RdgC	-2.71624
				W1DM05	Ribosome hibernation protein YfiA	1.91222						W1DMJ6	Ferrochelatase	-1.15753
				W1DM17	Thiol:disulfide interchange protein	2.97473						W1DMJ8	Dihydrolipoyl dehydrogenase	-1.72258
				W1DM18	Inner membrane protein YqjE	2.37316						W1DMK8	Alanine--tRNA ligase	-1.02826
				W1DM31	Class B acid phosphatase	1.62089						W1DMM4	UDP-N-acetylmuramate:L-alanyl-gamma-D-glutamyl-meso-diaminopimelate ligase	-2.18638
				W1DM32	Rare lipoprotein A	1.00957						W1DMP0	TonB-dependent hemin, ferrichrome receptor	-2.59182
				W1DM44	Outer membrane protein assembly factor BamA	1.29612						W1DMW8	Valine--tRNA ligase	-2.21539
				W1DM48	Homolog of E. coli HemY protein	1.74762						W1DMY3	Methionine ABC transporter substrate-binding protein	-1.28505
				W1DM54	Putative stomatin/prohibitin-family membrane protease subunit YbbK	1.64595						W1DN07	Orotate phosphoribosyltransferase	-1.09086
				W1DM75	50S ribosomal protein L23	2.07369						W1DN10	DNA repair protein RadA	-1.10359
				W1DMA2	D-3-phosphoglycerate dehydrogenase	1.82584						W1DN14	Trp operon repressor	-2.05971
				W1DMB0	CDP-diacylglycerol--serine O-phosphatidyltransferase	2.59621						W1DN20	Diaminobutyrate--2-oxoglutarate aminotransferase	-3.23433
				W1DMD2	Phosphoenolpyruvate carboxylase	2.54719						W1DN54	Elongation factor P-like protein	-1.0677
				W1DMF6	Alkyl hydroperoxide reductase subunit C-like protein	1.17499						W1DN65	3-deoxy-D-manno-octulosonic-acid transferase	-2.35263
				W1DMG4	YcfF/hinT protein: a purine nucleoside phosphoramidase	3.93923						W1DN78	Formyltetrahydrofolate deformylase	-1.41965
				W1DMI6	5-deoxynucleotidase	1.06596						W1DN88	Oxidoreductase	-3.01692
				W1DMM3	Pyruvate formate-lyase	3.57152						W1DNA2	Aspartate 1-decarboxylase	-1.73462
				W1DMM9	Transcriptional regulatory protein RcsB	1.83717						W1DNB9	50S ribosomal protein L10	-1.7432
				W1DMN7	Hypothetical oxidoreductase YqhD	1.92704						W1DND2	UDP-N-acetylmuramoylalanyl-D-glutamate--2,6-diaminopimelate ligase	-3.76866
				W1DMQ5	Shikimate kinase 1	2.55558						W1DNF6	Cysteine desulfurase IscS	-1.49324
				W1DMQ6	Glycerol kinase	1.9707						W1DNI7	Serine transporter	-1.53235
				W1DMU8	Sigma factor RpoE negative regulatory protein RseB	3.52875						W1DNM5	PTS system, diacetylchitobiose-specific IIA component	-2.22679
				W1DMV9	Hypothetical tRNA/rRNA methyltransferase yfiF	2.69746						W1DNP3	Isochorismatase [enterobactin] siderophore / Apo-aryl carrier domain of EntB	-2.39136
				W1DN03	Acylphosphatase	1.1771						W1DNQ6	Aspartate-semialdehyde dehydrogenase	-1.26275
				W1DN04	ATP-dependent helicase HrpA	2.55744						W1DNR8	Putative oxidoreductase YncB	-1.29302
				W1DN35	30S ribosomal protein S21	2.36682						W1DNS4	Peptidyl-prolyl cis-trans isomerase	-2.38632
				W1DN39	Peptidyl-prolyl cis-trans isomerase	1.16274						W1DNS8	ATP-dependent hsl protease ATP-binding subunit HslU	-1.0547
				W1DN42	Chromosome partition protein MukB	2.45273						W1DNV6	D-alanyl-D-alanine carboxypeptidase	-1.42602
				W1DN92	D-mannonate oxidoreductase	1.84592						W1DNW7	IncW plasmid conjugative relaxase protein TrwC (TraI homolog)	-1.15621
				W1DN93	Glutamate synthase [NADPH] large chain	2.49899						W1DNX9	Predicted outer membrane lipoprotein YfeY	-1.86083
				W1DNC4	DNA-directed RNA polymerase subunit	1.0268						W1DNY7	Acyl-CoA dehydrogenases	-1.12656
				W1DNC9	Lipoprotein NlpD	2.23473						W1DNZ2	Polyribonucleotide nucleotidyltransferase	-1.32447
				W1DNH0	30S ribosomal protein S12	2.06359						W1DNZ8	50S ribosomal protein L29	-2.06149
				W1DNJ1	Thiamine-monophosphate kinase	2.54767						W1DP04	Argininosuccinate synthase	-1.06679
				W1DNK1	Deoxyribose-phosphate aldolase	2.07475						W1DP28	Putative sugar ABC transporter	-1.31535
				W1DNK8	Septum site-determining protein MinD	2.27359						W1DP44	PTS system, glucose-specific IIB component / PTS system, glucose-specific IIC component	-2.33191
				W1DNN1	Endopeptidase La	1.31398						W1DP59	Shikimate kinase 1	-1.13832
				W1DNN3	Diaminopimelate decarboxylase	1.5478						W1DP79	GTPase Obg	-3.66687
				W1DNS7	Arginine ABC transporter, periplasmic arginine-binding protein ArtJ	2.14812						W1DP89	Uncharacterized ABC transporter, auxiliary component YrbC	-2.50409
				W1DNV4	Tryptophanyl-tRNA synthetase	1.78743						W1DPF9	Uncharacterized protein	-2.36185
				W1DNW1	ATP-dependent 6-phosphofructokinase	1.50148						W1DPK2	TldE protein, part of TldE/TldD proteolytic complex	-1.96594
				W1DNW8	S-adenosylmethionine synthetase	1.8922						W1DPS7	D-alanyl-D-alanine carboxypeptidase	-1.60242
				W1DNY2	Triosephosphate isomerase	1.23374						W1DPY5	ABC transporter, ATP-binding protein	-1.69803
				W1DP13	Chromosome (Plasmid) partitioning protein ParA	2.94186						W1DQ07	Phosphopantothenoylcysteine decarboxylase / Phosphopantothenoylcysteine synthetase	-1.88188
				W1DP47	Transcription elongation factor GreA	1.3192						W1DQ14	TonB-dependent receptor Outer membrane receptor for ferric enterobactin and colicins B, D	-1.08717
				W1DP51	Uncharacterized PLP-dependent aminotransferase YfdZ	1.59348						W1DQ89	Glyceraldehyde-3-phosphate ketol-isomerase	-3.54765
				W1DP52	Biosynthetic arginine decarboxylase	3.60875						W1DQF5	Putative metal chaperone, involved in Zn homeostasis, GTPase of COG0523 family	-3.34661
				W1DP55	YrbA protein	1.79868						W1DQH0	Fatty acid metabolism regulator protein	-2.1096
				W1DP87	NADH-ubiquinone oxidoreductase chain G	2.74769						W1DQH4	Translation elongation factor G	-1.51301
				W1DPA9	UDP-sugar hydrolase 5-nucleotidase	2.73133						W1DQK4	Sulfate and thiosulfate binding protein CysP	-1.87082
				W1DPB8	NAD(P)H-flavin oxidoreductase	2.53222						W1DQS9	Uridylate kinase	-1.12392
				W1DPE3	NAD(P) transhydrogenase subunit beta	3.21591						W1DQU6	Chromosome segregation ATPase	-2.39879
				W1DPF4	Pyrimidine/purine nucleoside phosphorylase	3.87036						W1DQU9	Protein YigP (COG3165) clustered with ubiquinone biosynthetic genes	-3.02932
				W1DPH2	Short chain dehydrogenase	1.17364						W1DQW7	Cof protein, HD superfamily hydrolase	-1.15564
				W1DPI2	Succinate-semialdehyde dehydrogenase [NAD] Succinate-semialdehyde dehydrogenase [NADP+]	1.0272						W1DQZ4	Putative ACR protein	-1.88658
				W1DPI9	Transcriptional regulator KdgR, KDG operon repressor	1.03374						W1DQZ6	Cell division protein ZapA	-1.43304
				W1DPJ4	ATP-dependent Clp protease ATP-binding subunit ClpA	2.56358						W1DR02	Chromosome initiation inhibitor	-2.9858
				W1DPM3	Phenylalanine--tRNA ligase alpha subunit	2.1588						W1DR26	N-acetyl-gamma-glutamyl-phosphate reductase	-1.86649
				W1DPM7	Threonine--tRNA ligase	1.16686						W1DR29	D-cysteine desulfhydrase	-1.35341
				W1DPP2	Soluble lytic murein transglycosylase	1.47643						W1DR34	FIG004454: RNA binding protein	-1.70205
				W1DPP5	Right origin-binding protein	1.47581						W1DR61	Glycerol dehydrogenase	-1.31039
				W1DPV2	Maf-like protein	3.50844						W1DR83	Catalase	-1.59422
				W1DPX5	Mannonate dehydratase	2.11336						W1DRB1	Phenylalanine--tRNA ligase beta subunit	-2.50323
				W1DQ09	Oxidoreductase	1.93337						W1DRD8	Aromatic amino acid transport protein AroP	-1.4981
				W1DQ10	1,3-propanediol dehydrogenase	2.08116						W1DRD9	Methylenetetrahydrofolate reductase	-2.38835
				W1DQ51	C4-dicarboxylate transport protein	1.80945						W1DRE6	Aspartyl-tRNA synthetase	-1.77126
				W1DQA8	Nucleoside permease	1.25848						W1DRH7	Phenylalanyl-tRNA synthetase beta chain	-3.21579
				W1DQB4	Lipoate-protein ligase A	3.2906						W1DRL3	Ribonucleoside-diphosphate reductase subunit beta	-2.1266
				W1DQC3	UPF0482 protein	1.68121						W1DRT6	5-keto-2-deoxygluconokinase / uncharacterized domain	-3.27728
				W1DQE2	RNA polymerase sigma factor RpoS	1.72187						W1DRX3	Glucose-1-phosphatase	-1.51595
				W1DQE3	3-hydroxydecanoyl-[acyl-carrier-protein] dehydratase	1.061						W1DRY3	Pyridoxine 5-phosphate synthase	-2.33206
				W1DQG6	Putative oxidoreductase	3.84225						W1DRZ3	Pantothenate synthetase	-1.69588
				W1DQH1	Arginine ABC transporter, periplasmic arginine-binding protein ArtI	2.67381						W1DS38	Diguanylate cyclase/phosphodiesterase domain 2 (EAL)	-2.80346
				W1DQH9	Septum site-determining protein MinC	1.6256						W1DSA4	NADPH-dependent 7-cyano-7-deazaguanine reductase	-1.77028
				W1DQJ4	Decarboxylase family protein	2.33848						W1DSB7	SsrA-binding protein	-2.64979
				W1DQJ5	ATP-dependent hsl protease ATP-binding subunit HslU	2.27463						W1DSG2	Promiscuous sugar phosphatase YidA, haloacid dehalogenase-like phosphatase family	-3.13697
				W1DQK5	Serine protein kinase (PrkA protein), P-loop containing	3.33954						W1DSJ5	Succinyl-CoA synthetase, alpha subunit-related enzymes	-1.91328
				W1DQK9	Predicted dye-decolorizing peroxidase (DyP),YfeX-like subgroup	2.1898						W1DSK6	Polysaccharide export lipoprotein Wza	-3.87937
				W1DQL0	NAD-dependent glyceraldehyde-3-phosphate dehydrogenase	1.25716						W1DSM5	Uncharacterized protein	-3.43006
				W1DQM1	Phage shock protein A	3.85248						W1DSN1	Ferrichrome-iron receptor	-1.2134
				W1DQN0	Phosphoenolpyruvate-dihydroxyacetone phosphotransferase, dihydroxyacetone binding subunit DhaK	3.50764						W1DSN5	Methionine synthase	-3.78321
				W1DQQ4	DNA polymerase III beta subunit	1.44762						W1DSP7	Multimodular transpeptidase-transglycosylase	-1.20558
				W1DQR0	Inosine-uridine preferring nucleoside hydrolase	2.89157						W1DSQ1	Maltodextrin-binding protein	-3.12053
				W1DQR5	Copper-sensing two-component system response regulator CpxR	3.63189						W1DST0	FIG000325: clustered with transcription termination protein NusA	-2.62622
				W1DQR7	Argininosuccinate synthase	2.84726						W1DST8	Outer membrane protein F	-1.99151
				W1DQS5	Methionine aminopeptidase	2.79831						W1DSW3	Phosphoheptose isomerase	-1.70437
				W1DQS7	DNA gyrase subunit B	3.86245						W1DT03	Uncharacterized protein	-1.29128
				W1DQT2	UvrABC system protein A	1.03908						W1DT07	Exopolyphosphatase	-1.24843
				W1DQU2	5-methylthioadenosine/S-adenosylhomocysteine nucleosidase	2.70546						W1DT72	Multimodular transpeptidase-transglycosylase	-1.11837
				W1DQV6	Arginine decarboxylase	3.52459						W1DT92	Glycine dehydrogenase [decarboxylating] (Glycine cleavage system P protein)	-1.24545
				W1DQX2	Uridine phosphorylase	1.86583						W1DTA1	Cysteine synthase	-1.09654
				W1DQX3	Arginine--tRNA ligase	3.32257						W1DTB3	N-acetylglucosamine-6-phosphate deacetylase	-2.18744
				W1DR11	Putative metalloprotease yggG	1.74799						W1DTB8	Integration host factor subunit alpha	-3.33602
				W1DR59	Enolase	1.12069						W1DTC1	30S ribosomal protein S18	-1.76178
				W1DR72	Osmotically inducible lipoprotein E	3.12719						W1DTE0	Methylenetetrahydrofolate dehydrogenase (NADP+) / Methenyltetrahydrofolate cyclohydrolase	-3.3265
				W1DRB3	Two-component system response regulator OmpR	1.61689						W1DTL1	Uncharacterized membrane lipoprotein clustered with tellurite resistance proteins TehA/TehB	-1.90934
				W1DRC7	DcrB protein	2.13512						W1DTM0	Protein HflK	-1.10131
				W1DRE1	Protein ydgH	1.89512						W1DTM5	Cysteine--tRNA ligase	-1.13977
				W1DRF0	Iron-sulfur cluster assembly ATPase protein SufC	3.10828						W1DTR6	Riboflavin synthase eubacterial/eukaryotic	-2.82222
				W1DRF1	Formate hydrogenlyase subunit 5	2.35366						W1DTS0	Dipeptidyl carboxypeptidase Dcp	-1.19896
				W1DRI4	PTS system, mannose-specific IIB component	2.39637						W1DTT0	Oxidoreductase	-1.27413
				W1DRI7	Lysyl-tRNA synthetase (Class II)	1.40868						W1DTU5	Lipoprotein	-1.33529
				W1DRI9	Glucosamine--fructose-6-phosphate aminotransferase [isomerizing]	1.62699						W1DTY7	Outer membrane protein NlpB, lipoprotein component of the protein assembly complex (Forms a complex with YaeT, YfiO, and YfgL) Lipoprotein-34	-1.28739
				W1DRL2	PTS system, mannose-specific IIC component	1.42107						W1DU22	Glucans biosynthesis protein G	-2.89358
				W1DRQ1	Peptidyl-prolyl cis-trans isomerase	2.65549						W1DU59	Imidazole glycerol phosphate synthase subunit HisF	-2.17093
				W1DS13	Small heat shock protein	1.13286						W1DUB1	Ribonucleotide reductase of class Ia (Aerobic),alpha subunit	-1.30492
				W1DS25	Thioredoxin reductase	2.0008						W1DUB3	Peptidase B	-2.57721
				W1DSC1	Oxidoreductase	4.30776						W1DUC0	Tyrosine-protein kinase Wzc	-3.61362
				W1DSC3	Serine protein kinase (PrkA protein), P-loop containing	2.49415						W1DUE4	Multimodular transpeptidase-transglycosylase	-2.10094
				W1DSD8	Thiol:disulfide interchange protein	1.41742						W1DUG1	Probable haloacid dehalogenase-like hydrolase STY3852	-3.30263
				W1DSF5	Possible oxidoreductase	2.743						W1DUG5	Ribonucleotide reductase of class Ia (Aerobic),beta subunit	-1.46151
				W1DSH0	Thymidylate synthase	2.88507						W1DUH4	Glutamate transport ATP-binding protein	-3.0039
				W1DSJ4	Regulator of ribonuclease activity A	1.45998						W1DUQ2	Cytoplasmic copper homeostasis protein CutC	-1.0648
				W1DSK3	S-methylmethionine permease	1.48875						W1DUR3	Maltoporin (Maltose/maltodextrin high-affinity receptor, phage lambda receptor protein)	-1.89778
				W1DSM7	Cation efflux system protein CusC	2.63534						W1DUS4	Asparagine--tRNA ligase	-1.71951
				W1DST5	Uncharacterized protein	1.18509						W1DUT3	Cystine ABC transporter, periplasmic cystine-binding protein FliY	-1.38172
				W1DSU9	Enolase	1.41431						W1DUV2	Alkanesulfonate utilization operon LysR-family regulator CbI	-1.16501
				W1DSW8	LysR family transcriptional regulator YafC	1.49482						W1DUX7	Iron-sulfur cluster carrier protein	-3.39374
				W1DSY5	6-phospho-beta-glucosidase	2.65034						W1DV09	Polyphosphate kinase	-1.433
				W1DSZ4	Arsenate reductase	2.31145						W1DV95	Asparagine synthetase [glutamine-hydrolyzing]	-3.66476
				W1DT56	Osmoprotectant ABC transporter binding protein YehZ	1.91926						W1DVG5	Oxidoreductase, aldo/keto reductase family	-3.33992
				W1DT73	Methylenetetrahydrofolate reductase	1.75516						W1DVJ8	DNA-binding protein	-1.48731
				W1DT78	Protein ydgH	3.82074						W1DVX9	Ribonuclease E	-2.07731
				W1DT82	Phosphoenolpyruvate carboxykinase (ATP)	3.54437						W1DW23	Glycosyltransferase	-1.12313
				W1DT87	Fumarate and nitrate reduction regulatory protein	1.34956						W1DW28	dTDP-glucose 4,6-dehydratase	-3.14048
				W1DTA0	Pyruvate kinase	1.19038						W1DW60	Glucans biosynthesis protein G	-2.72343
				W1DTC7	Threonine--tRNA ligase	1.82518						W1DW82	Protein FdhE homolog	-1.30282
				W1DTI0	Glucosamine--fructose-6-phosphate aminotransferase [isomerizing]	3.26263						W1DWB5	Ribonuclease 3	-2.30507
				W1DTJ6	30S ribosomal protein S6	2.69244						W1DWC3	Low molecular weight protein-tyrosine-phosphatase Wzb	-2.92921
				W1DTL4	Spermidine synthase	1.73354						W1DWC4	LPS-assembly lipoprotein LptE	-1.52804
				W1DTQ0	UPF0301 protein	1.16376						W1DWZ9	Asparagine synthetase [glutamine-hydrolyzing]	-3.7399
				W1DTV3	NAD(P)H dehydrogenase (quinone)	1.55276						W1DX06	Glucosamine-6-phosphate deaminase	-1.45152
				W1DTZ5	Propanediol dehydratase small subunit	2.65393						W1DXM9	5-keto-2-deoxygluconokinase / uncharacterized domain	-3.18425
				W1DTZ9	Glycerol-3-phosphate acyltransferase	1.88789						W1DXT9	Protein translocase subunit SecA	-2.37207
				W1DU11	Quinone oxidoreductase	1.72881						W1DY17	GTPase Era	-2.03743
				W1DU33	COG1399 protein, clustered with ribosomal protein L32p	2.25647						W1DYC5	Methionyl-tRNA formyltransferase	-2.08624
				W1DU80	Formate dehydrogenase O beta subunit	3.91376
				W1DU93	Leucyl-tRNA synthetase	1.71955
				W1DUC4	UDP-glucose 6-dehydrogenase	2.30246
				W1DUC7	UTP--glucose-1-phosphate uridylyltransferase	2.07019
				W1DUE2	Aldose 1-epimerase family protein YeaD	3.80314
				W1DUH6	Formate dehydrogenase O alpha subunit @ selenocysteine-containing	2.50733
				W1DUJ4	Uncharacterized protein	1.222
				W1DUK0	Curved DNA-binding protein	3.00488
				W1DUL1	Elongation factor Ts	2.4055
				W1DUL8	Peptide deformylase	3.35113
				W1DUP3	Ferric hydroxamate outer membrane receptor FhuA	1.54947
				W1DUS3	UvrABC system protein C	1.94743
				W1DUZ0	Pyruvate kinase	1.75789
				W1DUZ1	D-Lactate dehydrogenase	3.60754
				W1DUZ3	C4-type zinc finger protein, DksA/TraR family	2.75216
				W1DV12	Phosphoenolpyruvate carboxykinase [ATP]	3.25106
				W1DVS3	General stress protein 18	4.27603
				W1DVV0	Acid phosphatase	2.48611
				W1DVW2	Putative fimbrial-like protein	3.43227
				W1DVY3	Thioredoxin/glutathione peroxidase BtuE	2.02514
				W1DW17	FIG002208: Acetyltransferase	2.26037
				W1DWC0	50S ribosomal protein L17	1.28961
				W1DWD0	Uncharacterized protein	3.46535
				W1DY05	Glycosyltransferase	2.82694
